# Supplementary material for: Engineered bacterial outer membrane vesicles encapsulating oncolytic adenoviruses enhance the efficacy of cancer virotherapy by augmenting tumor cell autophagy
Source: PubMed Central journal article supplement (PMC10203215; doi:10.1038/s41467-023-38679-z), 2023-05-22
Supplement: 41467_2023_38679_MOESM1_ESM.pdf [file 41467_2023_38679_MOESM1_ESM.pdf]

1  
2  
3  
4  
5  
6  
7  
8

**Supplementary Information**

**Engineered bacterial outer membrane vesicles encapsulating oncolytic  
adenoviruses enhance the efficacy of cancer virotherapy by augmenting tumor  
cell autophagy**

**Ban et al.**

9 **Supplementary Figures**

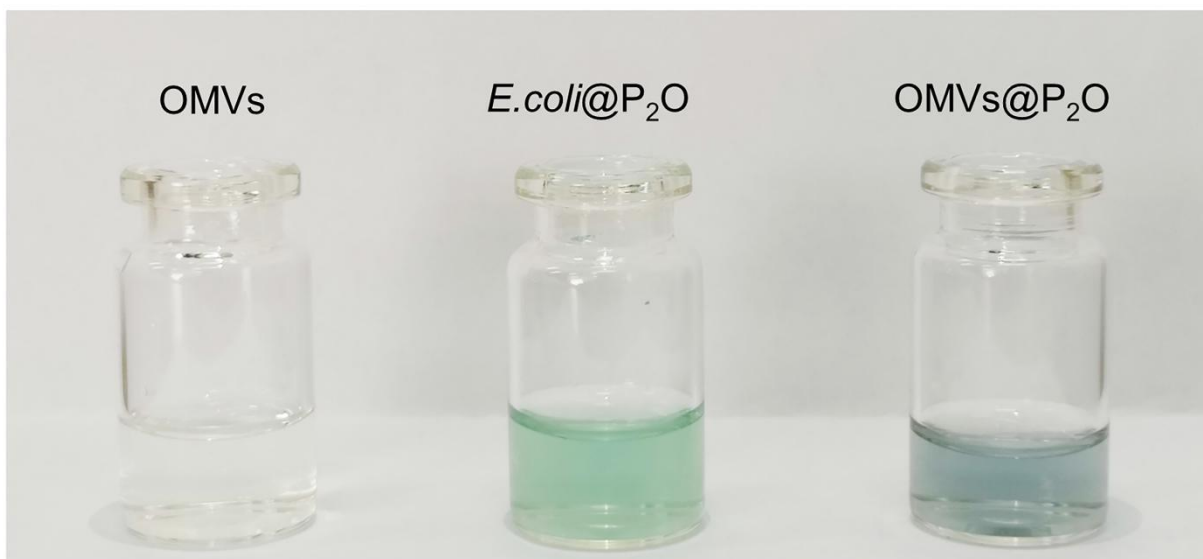

10  
11 **Supplementary Figure 1.** Qualitative analysis of P<sub>2</sub>O expression in OMVs, *E. coli*@P<sub>2</sub>O and  
12 OMVs@P<sub>2</sub>O. This experiment was repeated three times independently with similar results.

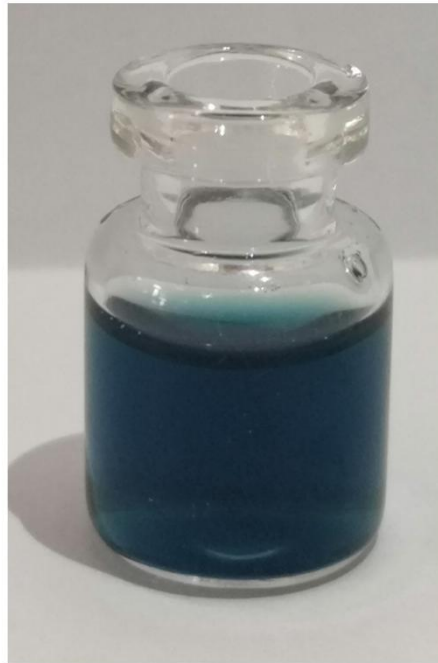

OMVs@P<sub>2</sub>O-Ads

- 13
- 14 **Supplementary Figure 2.** Qualitative analysis of P<sub>2</sub>O expression in OMVs@P<sub>2</sub>O-Ads. This
- 15 experiment was repeated three times independently with similar results.

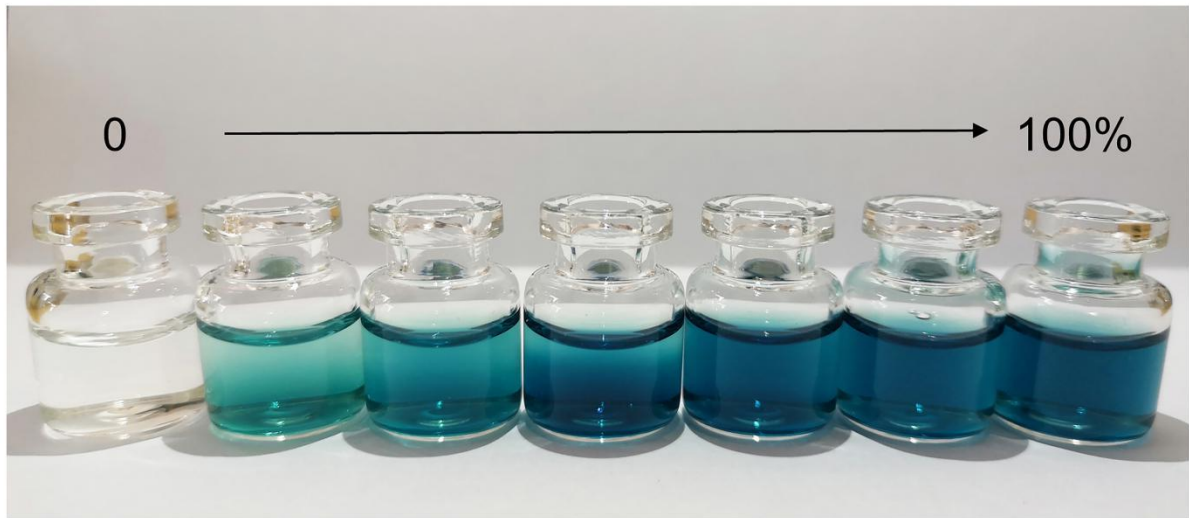

16  
17 **Supplementary Figure 3.** Qualitative analysis of different concentration P<sub>2</sub>O expression in  
18 OMVs@P<sub>2</sub>O. This experiment was repeated three times independently with similar results.

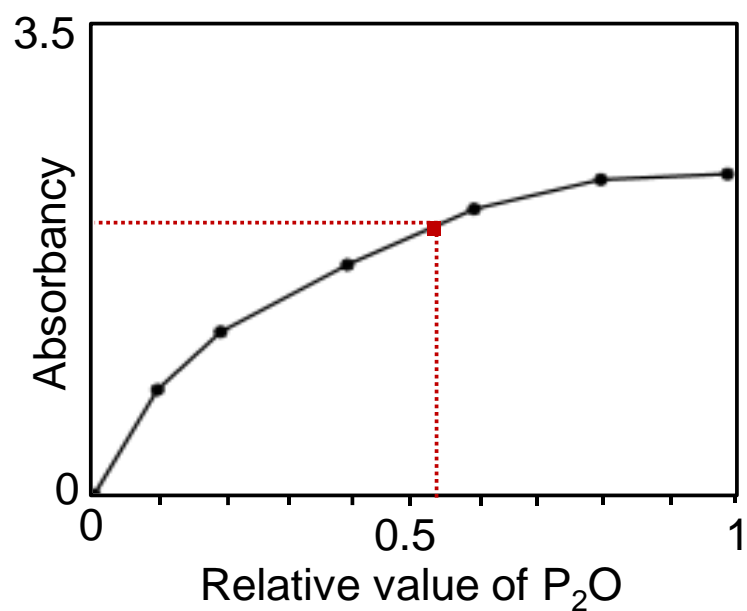

19  
20 **Supplementary Figure 4.** The function curve illustrated the relationship between the absorbance  
21 and P<sub>2</sub>O with different concentrations. The red point revealed the relative P<sub>2</sub>O concentration within  
22 the microbial nanocomposite. Source data are provided as a Source Data file. This experiment was  
23 repeated three times independently with similar results.

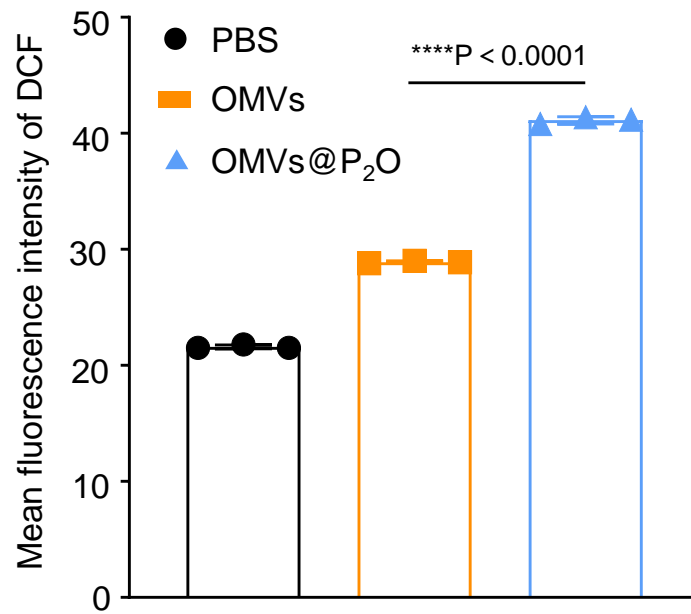

24  
25 **Supplementary Figure 5.** Quantitation of mean fluorescence intensity of DCF in PBS, OMVs and  
26 OMVs@P<sub>2</sub>O for ROS level assessment in cells. Data are presented as mean ± SD (n = 3  
27 independent experiments). \*\*\*\*P < 0.0001 by two-tailed Student's t-test. Source data are provided  
28 as a Source Data file.

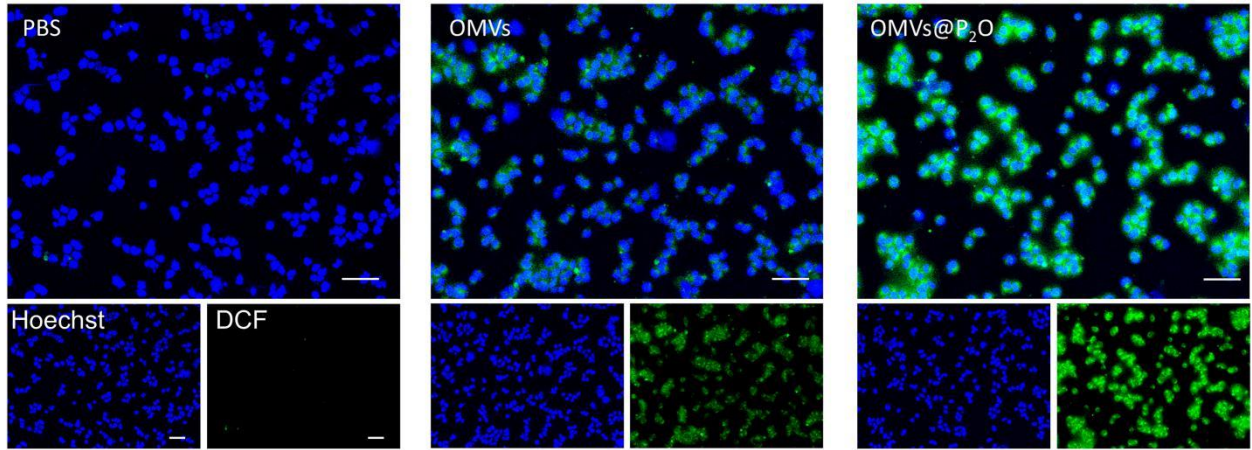

29  
30 **Supplementary Figure 6.** Immunofluorescence images of ROS expression in tumor cells in vitro.  
31 The cells were stained with DAPI (blue), and ROS were stained with DCF (green). Scale bars=100  
32  $\mu\text{m}$ . This experiment was repeated three times independently with similar results.

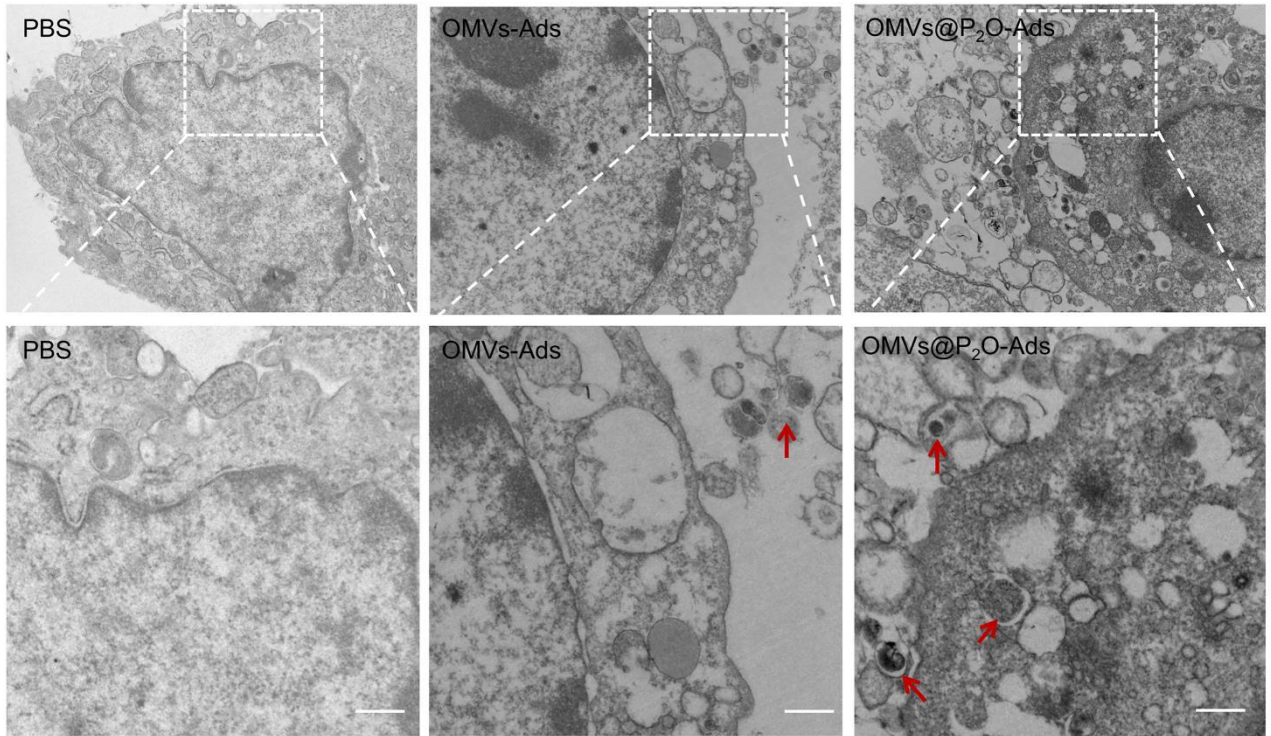

33  
34 **Supplementary Figure 7.** The equal-scaling amplifying TEM images of autophagosomes, scale  
35 bar=500 nm. This experiment was repeated three times independently with similar results.



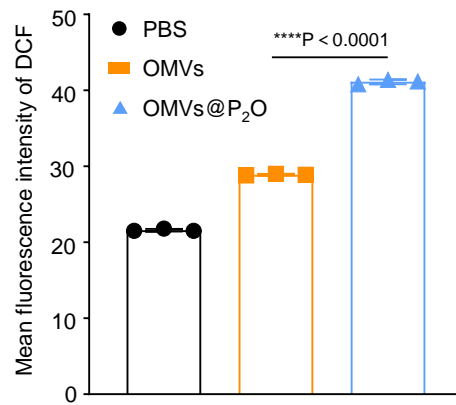

36  
37 **Supplementary Figure 8.** The LC3-II/LC3-I ratio in vitro. Data are presented as mean  $\pm$  SD (n = 3  
38 independent experiments). \*\* $P < 0.01$  by two-tailed Student's t-test. Source data are provided as a  
39 Source Data file.

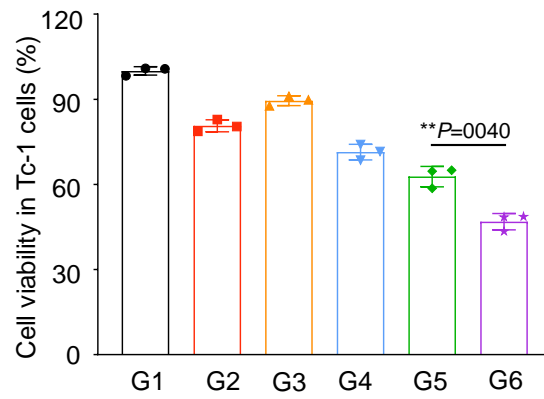

40

41

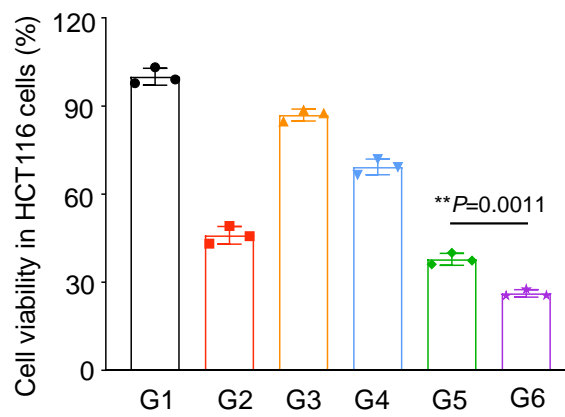

42

43 **Supplementary Figure 9.** Cytotoxicity of different formulations in TC-1 cells and HCT116 cells  
 44 by MTT assay. Data are presented as mean  $\pm$  SD (n = 3 independent experiments).  $**P < 0.01$  by  
 45 two-tailed Student's t-test. Source data are provided as a Source Data file. (G1: PBS, G2: Ads, G3:  
 46 OMVs, G4: OMVs@P<sub>2</sub>O, G5: OMVs-Ads, G6: OMVs@P<sub>2</sub>O-Ads).

47

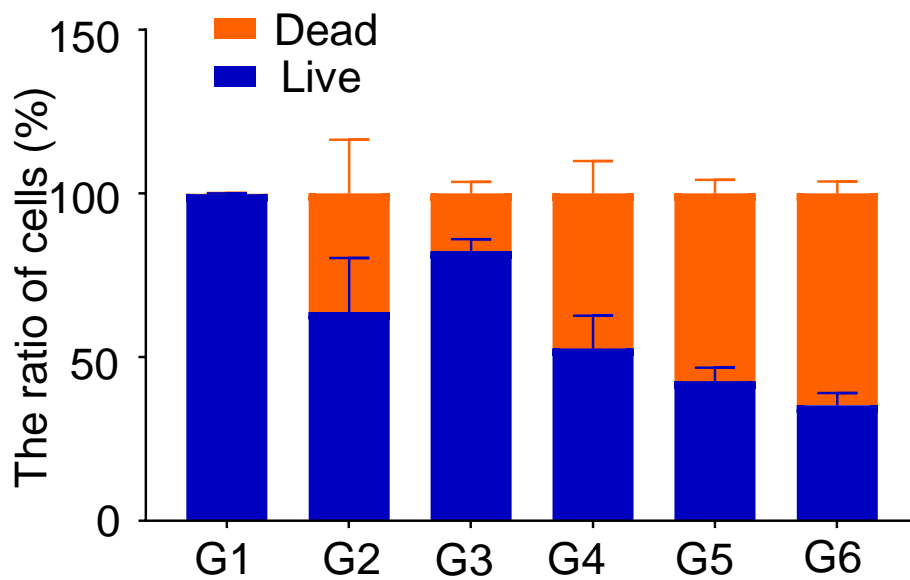

48  
49 **Supplementary Figure 10.** The statistical analysis result of live/dead cellular staining. Data are  
50 presented as mean  $\pm$  SD. Source data are provided as a Source Data file. (G1: PBS, G2: Ads, G3:  
51 OMVs, G4: OMVs@P<sub>2</sub>O, G5: OMVs-Ads, G6: OMVs@P<sub>2</sub>O-Ads). This experiment was repeated  
52 three times independently with similar results.  
53

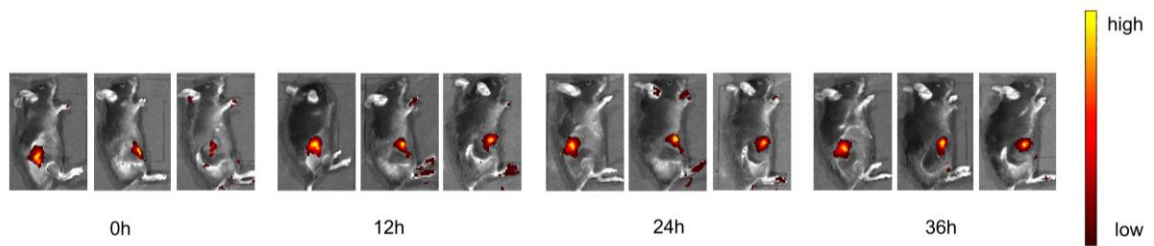

54  
55 **Supplementary Figure 11.** In vivo DIR fluorescent imaging of the nanocomposite in TC-1-hCD46  
56 xenograft tumor-bearing mice by IVIS (n = 4 mice).

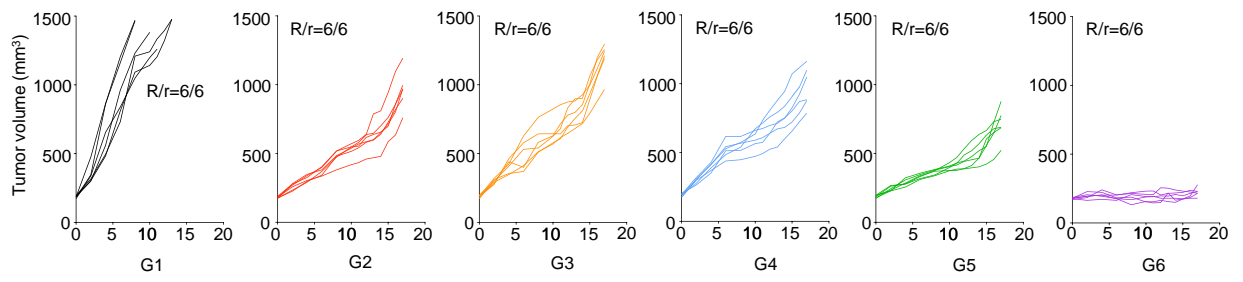

57  
58 **Supplementary Figure 12.** Individual tumor growth kinetics in different groups. (n = 6 mice).  
59 Source data are provided as a Source Data file. (G1: PBS, G2: Ads, G3: OMVs, G4: OMVs@P<sub>2</sub>O,  
60 G5: OMVs-Ads, G6: OMVs@P<sub>2</sub>O-Ads).

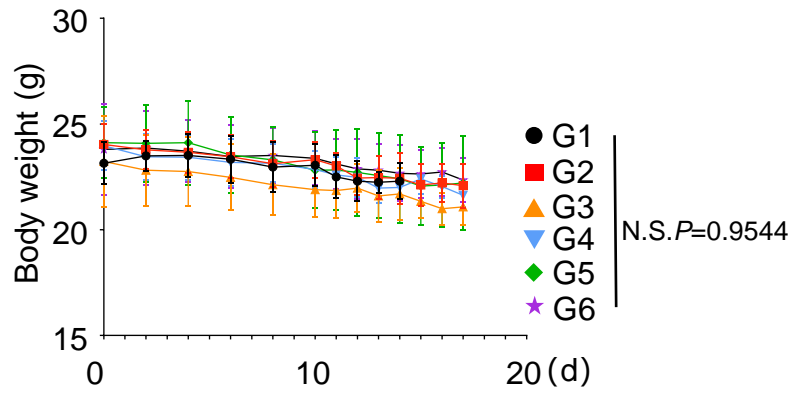

61  
 62 **Supplementary Figure 13.** Body weight changes of TC-1-bearing mice after intratumoral  
 63 administration of different formulations. Data are presented as mean  $\pm$  SD (n = 6 mice). N.S. (No  
 64 Significance)  $P > 0.05$  by two-tailed Student's t-test. Source data are provided as a Source Data file.  
 65 (G1: PBS, G2: Ads, G3: OMVs, G4: OMVs@P<sub>2</sub>O, G5: OMVs-Ads, G6: OMVs@P<sub>2</sub>O-Ads).

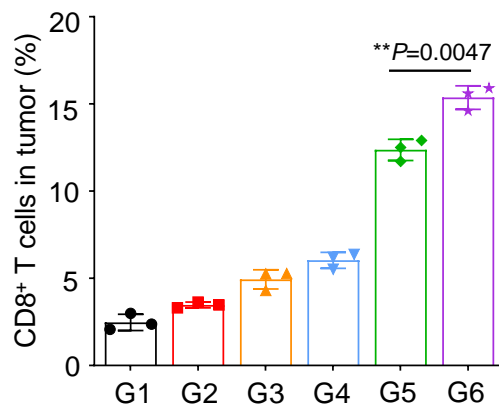

66

67 **Supplementary Figure 14.** The infiltration of CD8<sup>+</sup> T cells in tumor of mice treated with different

68 agents on the 18th day. Data are presented as mean  $\pm$  SD (n = 3 mice). **\*\*P < 0.01** by two-tailed

69 Student's t-test. Source data are provided as a Source Data file. (G1: PBS, G2: Ads, G3: OMVs, G4:

70 OMVs@P<sub>2</sub>O, G5: OMVs-Ads, G6: OMVs@P<sub>2</sub>O-Ads).

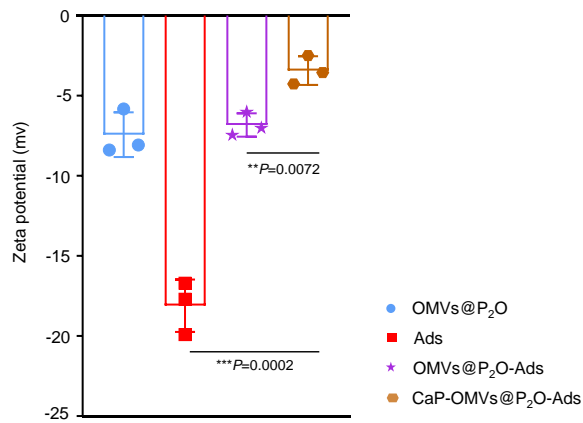

71  
 72 **Supplementary Figure 15.** Zeta-potential of OMVs@P<sub>2</sub>O, Ads, OMVs@P<sub>2</sub>O-Ads and  
 73 CaP-OMVs@P<sub>2</sub>O-Ads. Data are presented as mean ± SD (n = 3 independent experiments). \*\**P* <  
 74 0.01 and \*\*\**P* < 0.001 by two-tailed Student's t-test. Source data are provided as a Source Data file.



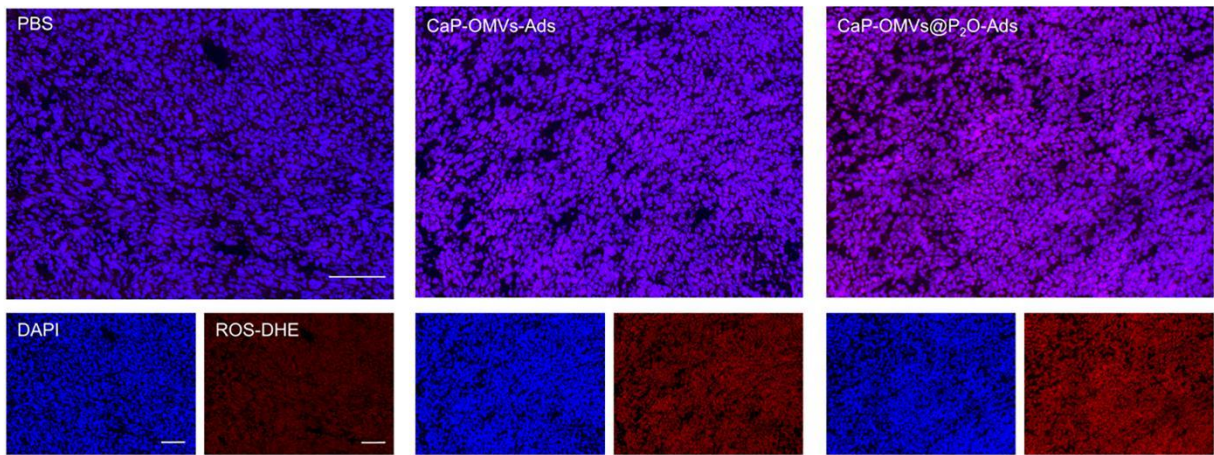

75  
76 **Supplementary Figure 16.** Immunofluorescence images of ROS in tumor tissues. Blue represents  
77 DAPI-stained tumor cells and red represents DHE. Scale bar=100  $\mu$ m. This experiment was  
78 repeated three mice with similar results.  
79

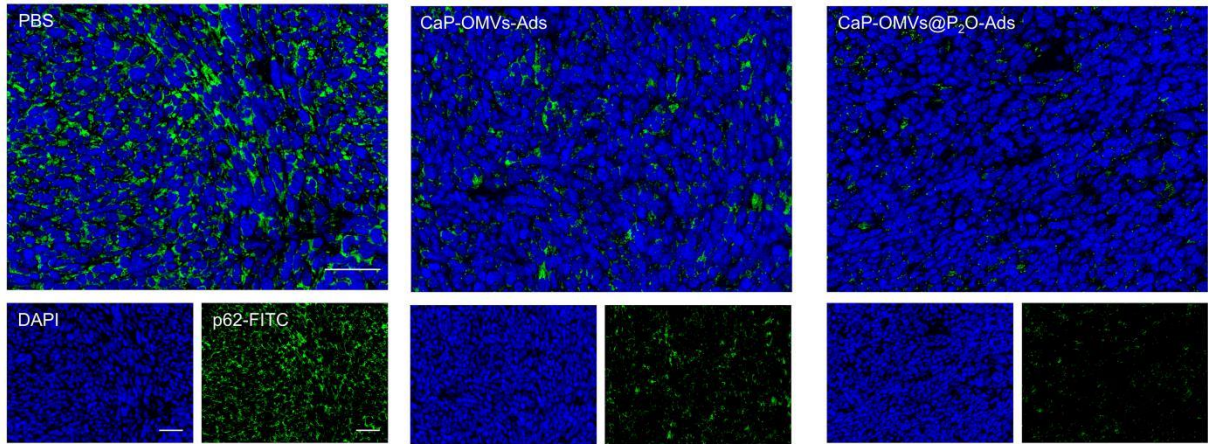

80  
81 **Supplementary Figure 17.** Immunofluorescence images of p62 autophagic proteins in tumor  
82 tissues. Blue represents DAPI-stained tumor cells and the green represents FITC-stained p62  
83 autophagic protein. Scale bar=50  $\mu\text{m}$ . This experiment was repeated three mice with similar results.

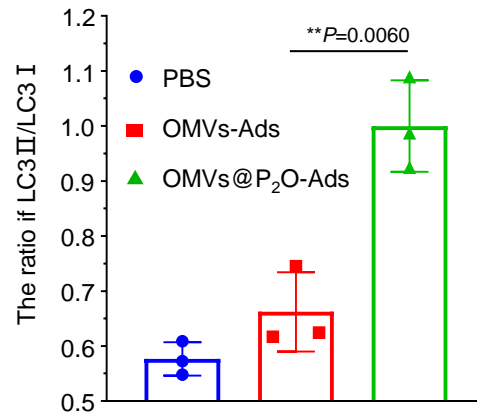

84  
 85 **Supplementary Figure 18.** The LC3-II/LC3-I ratio in vivo. Data are presented as mean  $\pm$  SD (n =  
 86 3 mice). \* $P < 0.01$  by two-tailed Student's t-test. Source data are provided as a Source Data file.

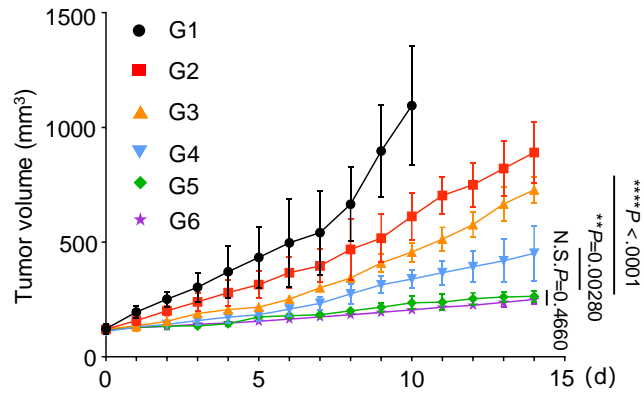

87

88 **Supplementary Figure 19.** The tumor of TC-1-bearing mice model volume change for TC-1

89 xenograft tumor model during different treatments. Data are presented as mean  $\pm$  SD (n = 6 mice).

90 N.S. (No Significance)  $P > 0.05$ ,  $**P < 0.01$  and  $****P < 0.0001$  by two-tailed Student's t-test.

91 Source data are provided as a Source Data file. (G1: PBS, G2: OMVs@P<sub>2</sub>O-Ads, G3:

92 CaP-OMVs-Ads, G4: Intra-Ads, G5: CaP-OMVs@P<sub>2</sub>O-Ads, G6: Intra-Ads high does).

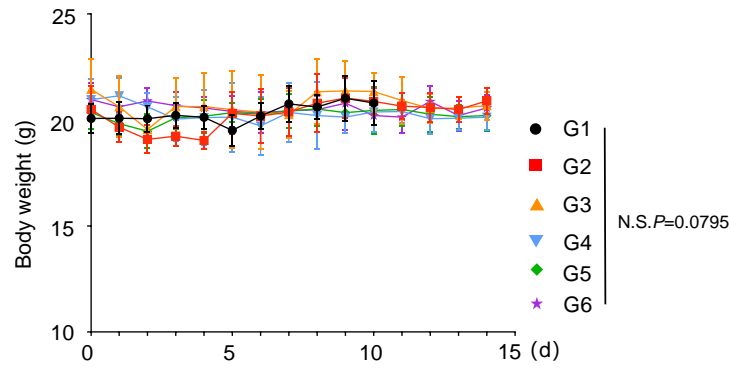

93  
 94 **Supplementary Figure 20.** Body weight changes of TC-1-bearing mice after administration of  
 95 different formulations. Data are presented as mean  $\pm$  SD (n = 6 mice). N.S. (No Significance)  $P >$   
 96 0.05 by two-tailed Student's t-test. Source data are provided as a Source Data file. (G1: PBS, G2:  
 97 OMVs@P<sub>2</sub>O-Ads, G3: CaP-OMVs-Ads, G4: Intra-Ads, G5: CaP-OMVs@P<sub>2</sub>O-Ads, G6: Intra-Ads  
 98 high does).

99

100

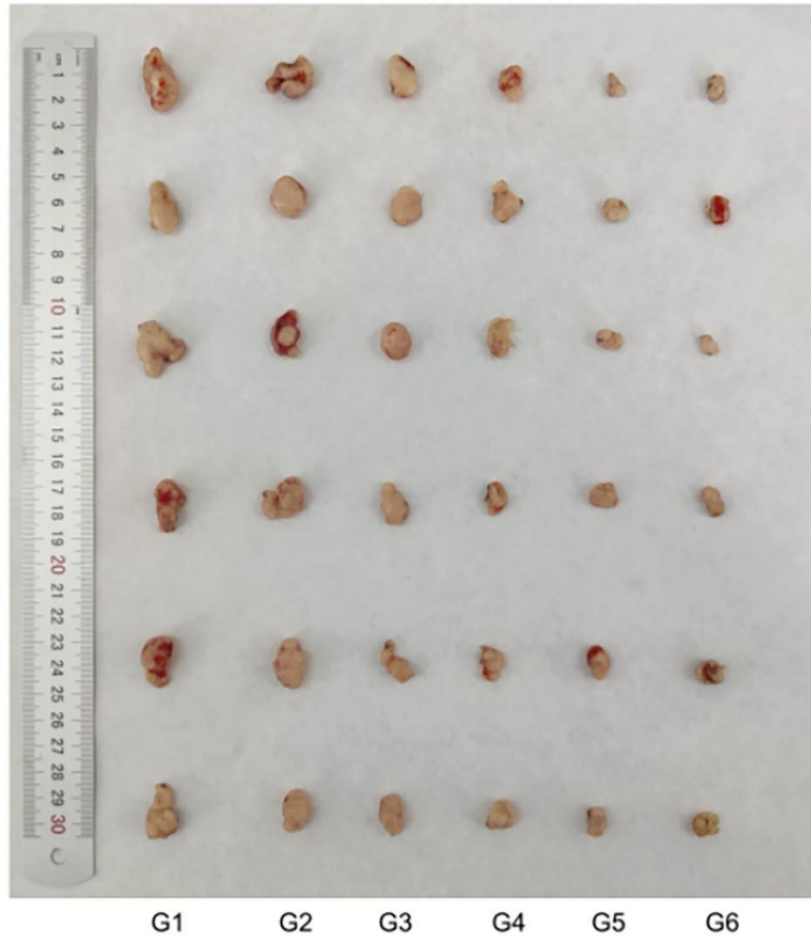

101  
102 **Supplementary Figure 21.** Images of representative tumors after different treatments at 15 days  
103 (n=6). (G1: PBS, G2: OMVs@P<sub>2</sub>O-Ads, G3: CaP-OMVs-Ads, G4: Intra-Ads, G5:  
104 CaP-OMVs@P<sub>2</sub>O-Ads, G6: Intra-Ads high does).

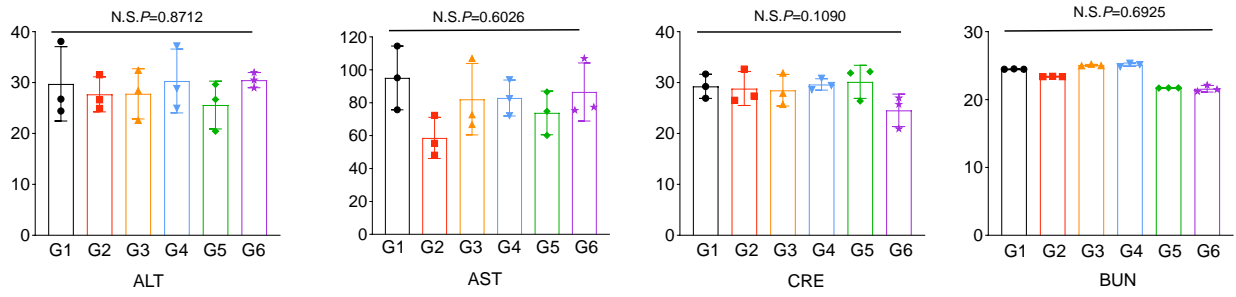

105  
 106 **Supplementary Figure 22.** Hepatorenal function indexes including aspartate aminotransferase  
 107 (AST), alanine aminotransferase (ALT) levels, creatinine (CRE) and blood urea nitrogen (BUN)  
 108 were measured. Data are presented as mean  $\pm$  SD (n = 3 mice). N.S. (No Significance)  $P > 0.05$  by  
 109 two-tailed Student's t-test. Source data are provided as a Source Data file. (G1: PBS, G2:  
 110 OMVs@P<sub>2</sub>O-Ads, G3: CaP-OMVs-Ads, G4: Intra-Ads, G5: CaP-OMVs@P<sub>2</sub>O-Ads, G6: Intra-Ads  
 111 high does).  
 112

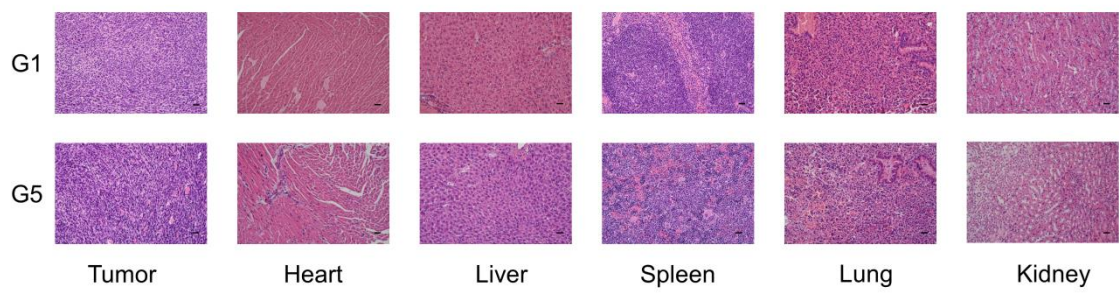

113  
114 **Supplementary Figure 23.** H&E staining images for major organs slices after different treatments.  
115 Scale bar=100  $\mu$ m. This experiment was repeated three mice with similar results.



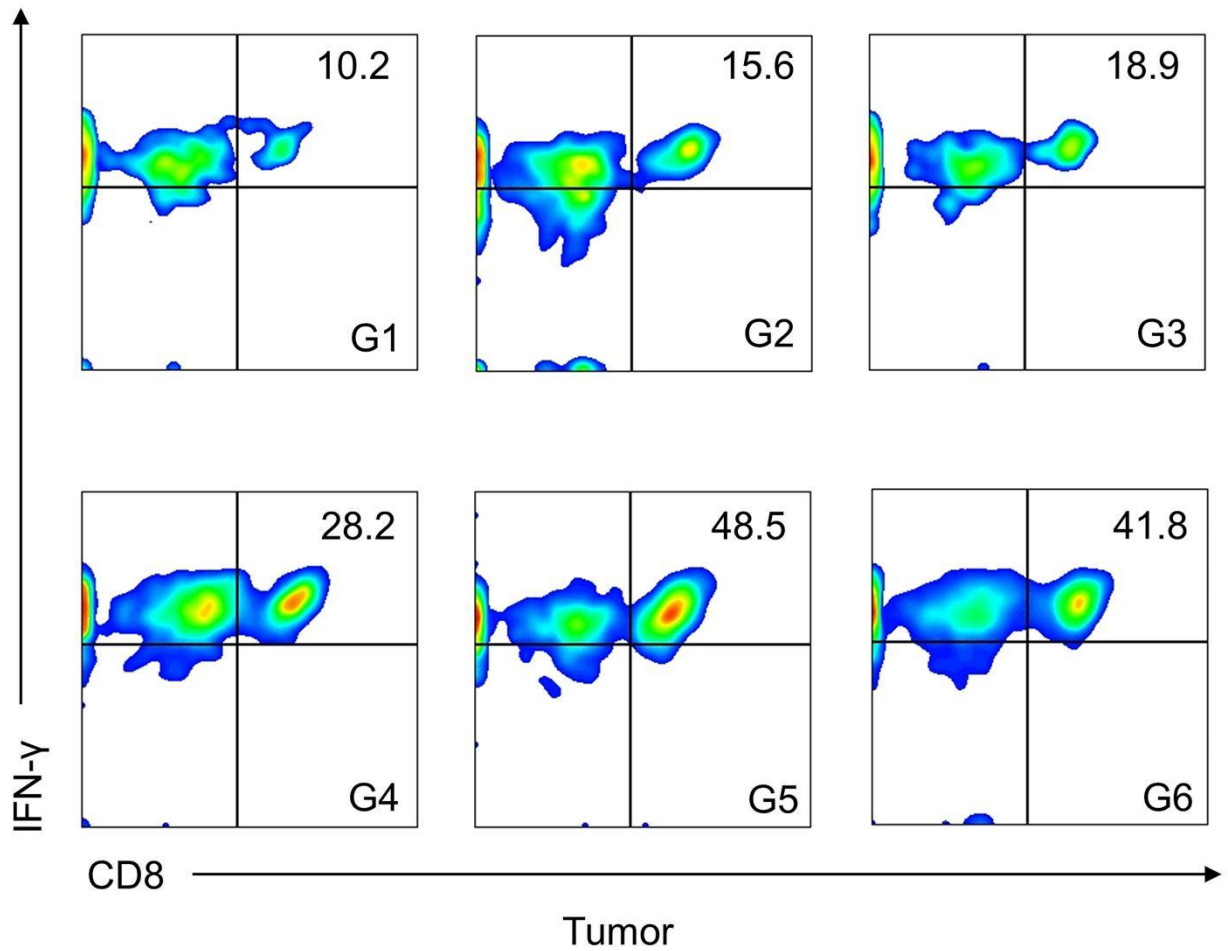

116  
 117 **Supplementary Figure 24.** Representative flow cytometric evolution images of IFN- $\gamma$ <sup>+</sup>CD8<sup>+</sup> T  
 118 cells (CD45<sup>+</sup>CD3<sup>+</sup>CD8<sup>+</sup>IFN- $\gamma$ <sup>+</sup>) in tumor. (G1: PBS, G2: OMVs@P<sub>2</sub>O-Ads, G3: CaP-OMVs-Ads,  
 119 G4: Intra-Ads, G5: CaP-OMVs@P<sub>2</sub>O-Ads, G6: Intra-Ads high does)  
 120

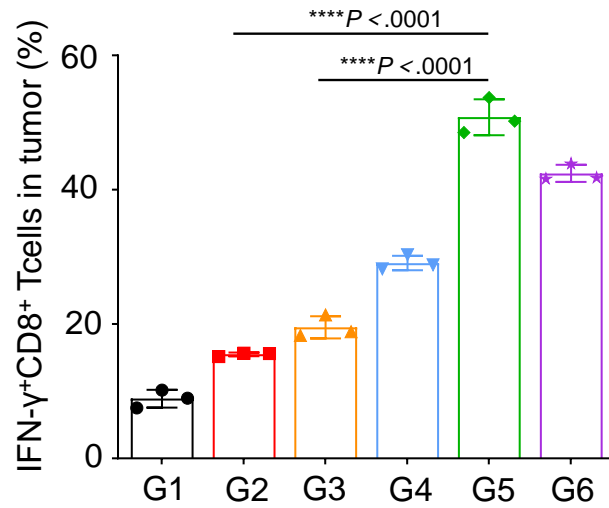

121  
 122 **Supplementary Figure 25.** Relative quantification of IFN- $\gamma$ <sup>+</sup>CD8<sup>+</sup> T cells  
 123 (CD45<sup>+</sup>CD3<sup>+</sup>CD8<sup>+</sup>IFN- $\gamma$ <sup>+</sup>) in tumor. Data are presented as mean  $\pm$  SD (n = 3 mice). \*\*\*\**P* <  
 124 0.0001 by two-tailed Student's t-test. Source data are provided as a Source Data file. (G1: PBS, G2:  
 125 OMVs@P<sub>2</sub>O-Ads, G3: CaP-OMVs-Ads, G4: Intra-Ads, G5: CaP-OMVs@P<sub>2</sub>O-Ads, G6: Intra-Ads  
 126 high does)

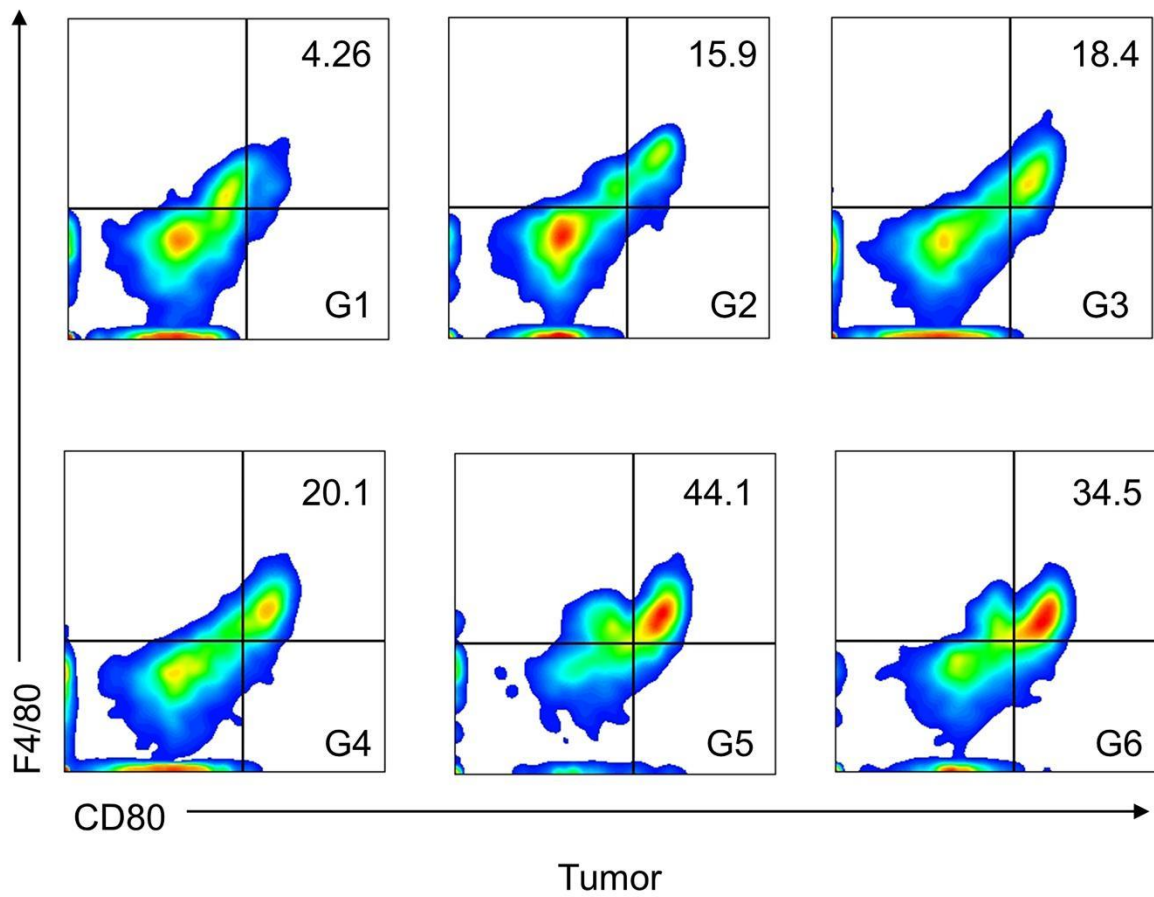

127  
 128 **Supplementary Figure 26.** Representative flow cytometric evolution images of M1-like  
 129 macrophages (CD45<sup>+</sup>F4/80<sup>+</sup>CD80<sup>+</sup>) in tumor (n=3). (G1: PBS, G2: OMVs@P<sub>2</sub>O-Ads, G3:  
 130 CaP-OMVs-Ads, G4: Intra-Ads, G5: CaP-OMVs@P<sub>2</sub>O-Ads, G6: Intra-Ads high does)

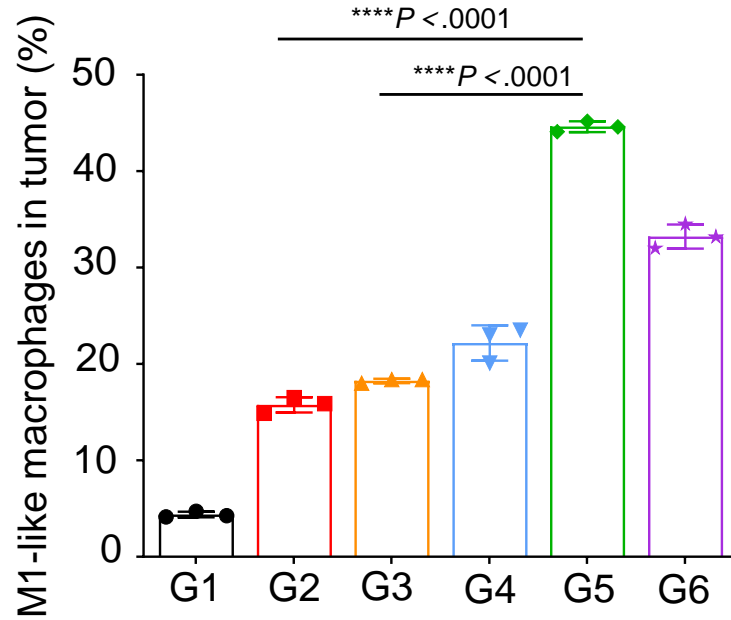

131  
 132 **Supplementary Figure 27.** Relative quantification of M1-like macrophages (CD45<sup>+</sup>F4/80<sup>+</sup>CD80<sup>+</sup>)  
 133 in tumor. Data are presented as mean  $\pm$  SD (n = 3 mice). \*\*\*\* $P < 0.0001$  by two-tailed Student's  
 134 t-test. Source data are provided as a Source Data file. (G1: PBS, G2: OMVs@P<sub>2</sub>O-Ads, G3:  
 135 CaP-OMVs-Ads, G4: Intra-Ads, G5: CaP-OMVs@P<sub>2</sub>O-Ads, G6: Intra-Ads high does)

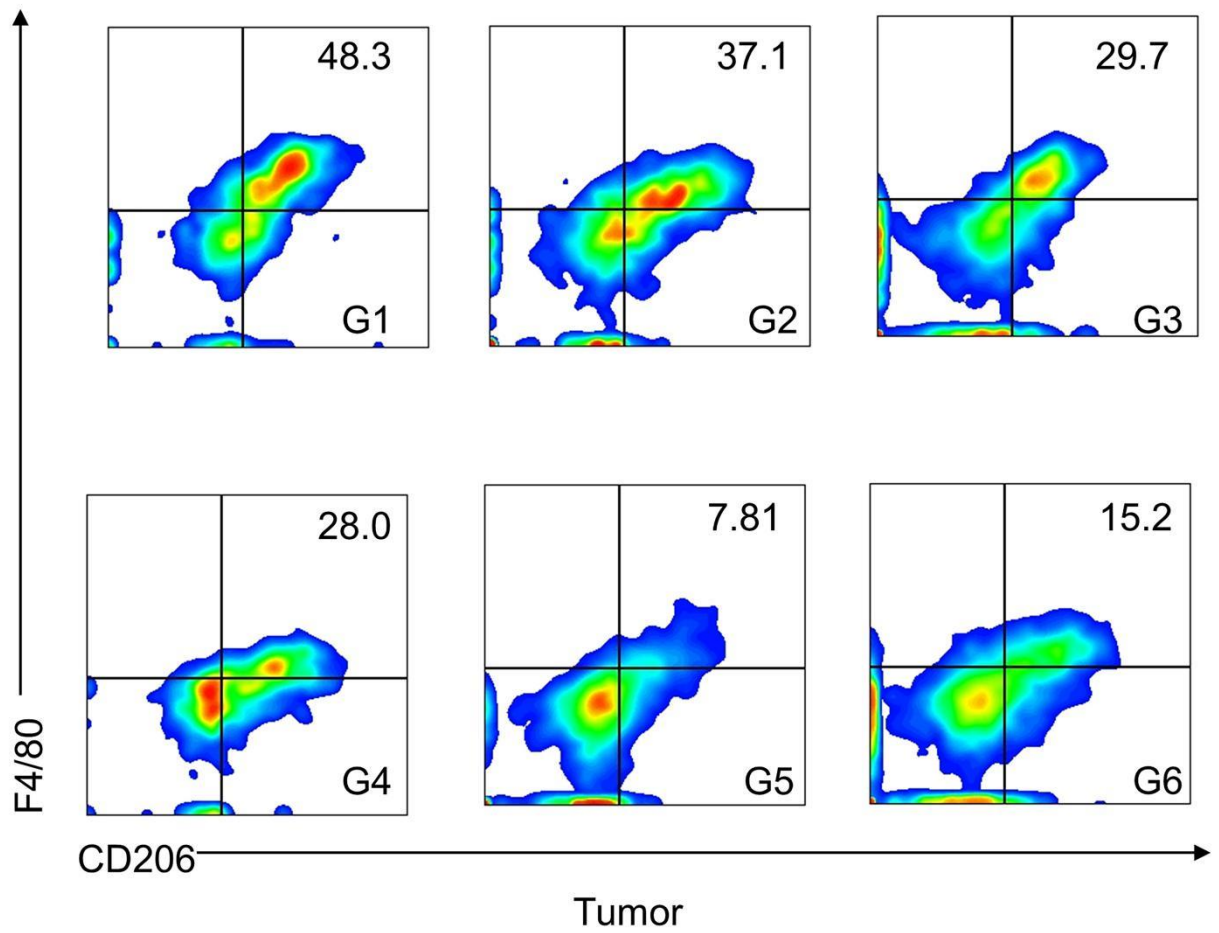

136  
 137 **Supplementary Figure 28.** Representative flow cytometric evolution images of M2-like  
 138 macrophages (CD45<sup>+</sup>F4/80<sup>+</sup>CD206<sup>+</sup>) in tumor (n=3). (G1: PBS, G2: OMVs@P<sub>2</sub>O-Ads, G3:  
 139 CaP-OMVs-Ads, G4: Intra-Ads, G5: CaP-OMVs@P<sub>2</sub>O-Ads, G6: Intra-Ads high does)

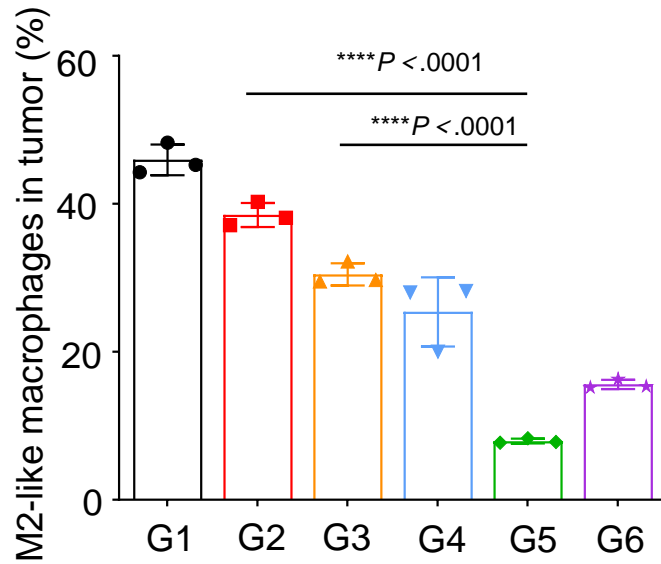

140  
 141 **Supplementary Figure 29.** Relative quantification of M2-like macrophages (CD45<sup>+</sup>F4/80<sup>+</sup>CD206<sup>+</sup>)  
 142 in tumor. Data are presented as mean  $\pm$  SD (n = 3 mice). \*\*\*\* $P < 0.0001$  by two-tailed Student's  
 143 t-test. Source data are provided as a Source Data file. (G1: PBS, G2: OMVs@P<sub>2</sub>O-Ads, G3:  
 144 CaP-OMVs-Ads, G4: Intra-Ads, G5: CaP-OMVs@P<sub>2</sub>O-Ads, G6: Intra-Ads high does)  
 145

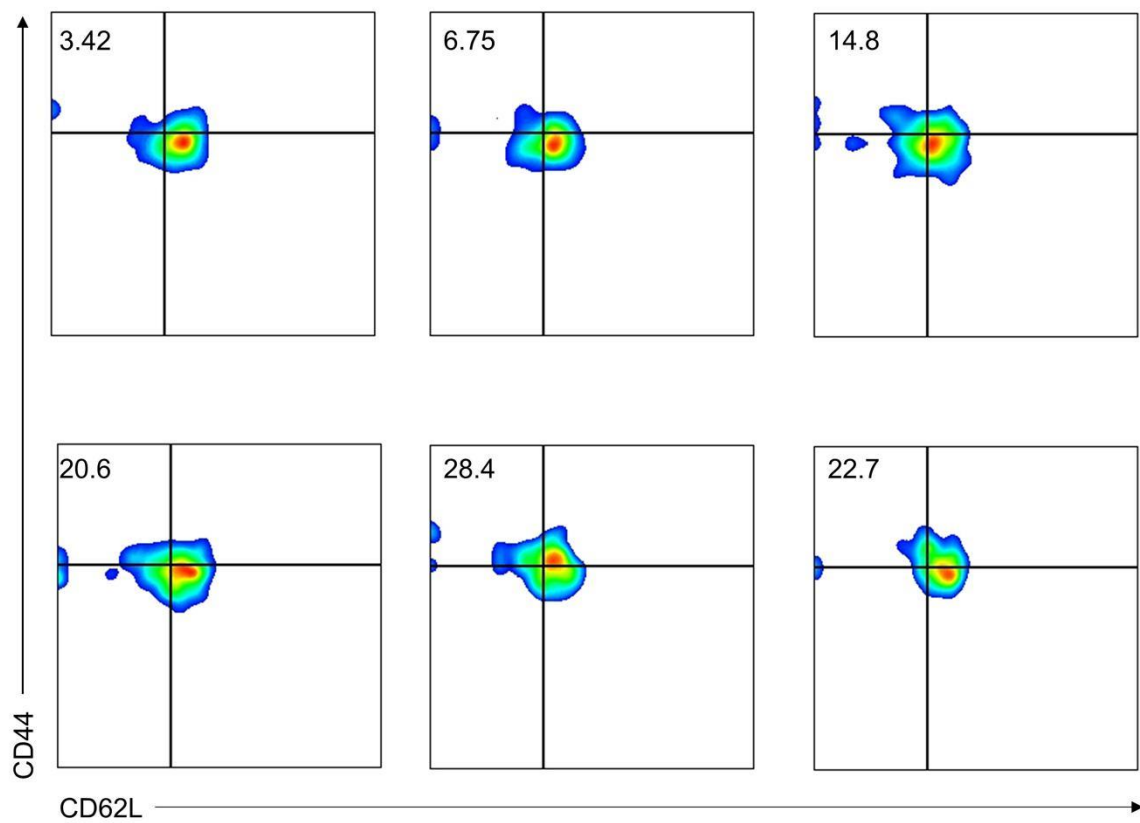

146  
 147 **Supplementary Figure 30.** The gating strategy of effector memory T cells (CD3<sup>+</sup> CD8<sup>+</sup> CD62L<sup>-</sup>  
 148 CD44<sup>+</sup>) in spleen. (G1: PBS, G2: OMVs@P<sub>2</sub>O-Ads, G3: CaP-OMVs-Ads, G4: Intra-Ads, G5:  
 149 CaP-OMVs@P<sub>2</sub>O-Ads, G6: Intra-Ads high dose).

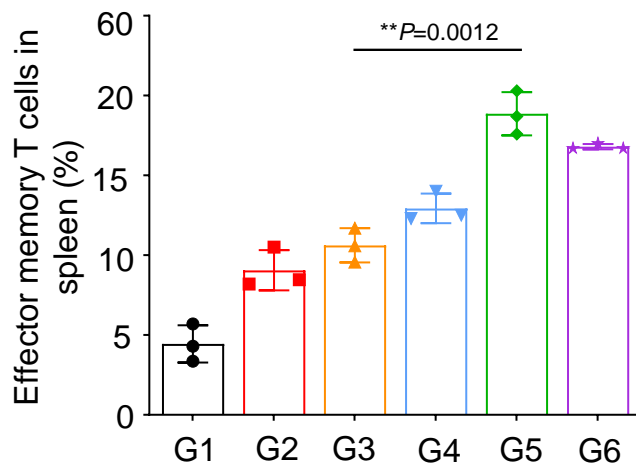

150  
 151 **Supplementary Figure 31.** Relative quantification of effector memory T cells  
 152 (CD3<sup>+</sup>CD8<sup>+</sup>CD62L<sup>-</sup>CD44<sup>+</sup>) in spleen. Data are presented as mean ± SD (n = 3 mice). \*\**P* < 0.01 by  
 153 two-tailed Student's t-test. Source data are provided as a Source Data file. (G1: PBS, G2:  
 154 OMVs@P<sub>2</sub>O-Ads, G3: CaP-OMVs-Ads, G4: Intra-Ads, G5: CaP-OMVs@P<sub>2</sub>O-Ads, G6: Intra-Ads  
 155 high dose)



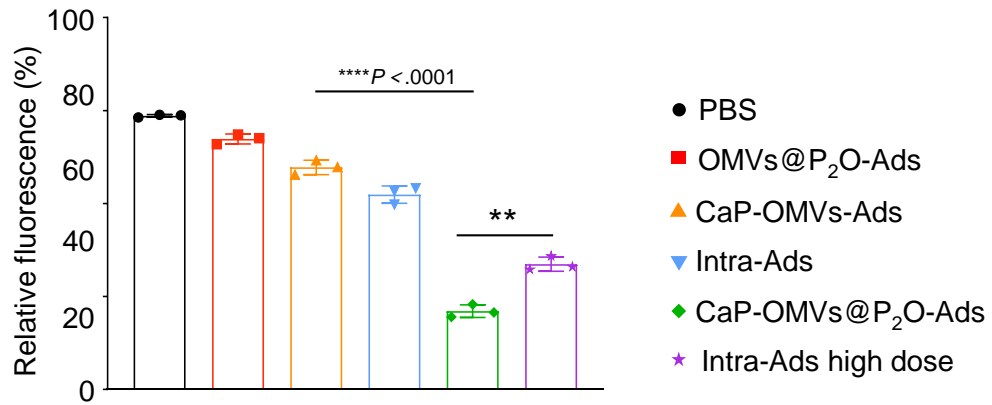

156  
 157 **Supplementary Figure 32.** The experimental result of the co-culture assay. Data are presented as  
 158 mean  $\pm$  SD (n = 3 independent experiments). \*\* $P < 0.01$ , \*\*\*\* $P < 0.0001$  by two-tailed Student's  
 159 t-test. Source data are provided as a Source Data file. (It's worth noting here that PBS represents T  
 160 cells extracted from mice in the PBS group, and other groups as above.)

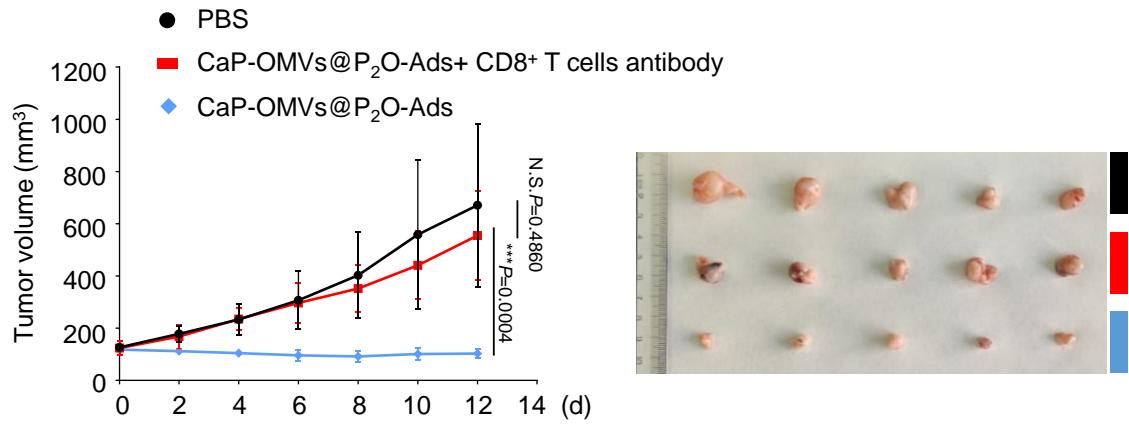

161  
 162 **Supplementary Figure 33.** Images of representative tumors of different treated groups on the 12<sup>th</sup>  
 163 day. Data are presented as mean  $\pm$  SD (n = 5 mice). \* $P < 0.05$ , \*\*\* $P < 0.001$  by two-tailed Student's  
 164 t-test. Source data are provided as a Source Data file.

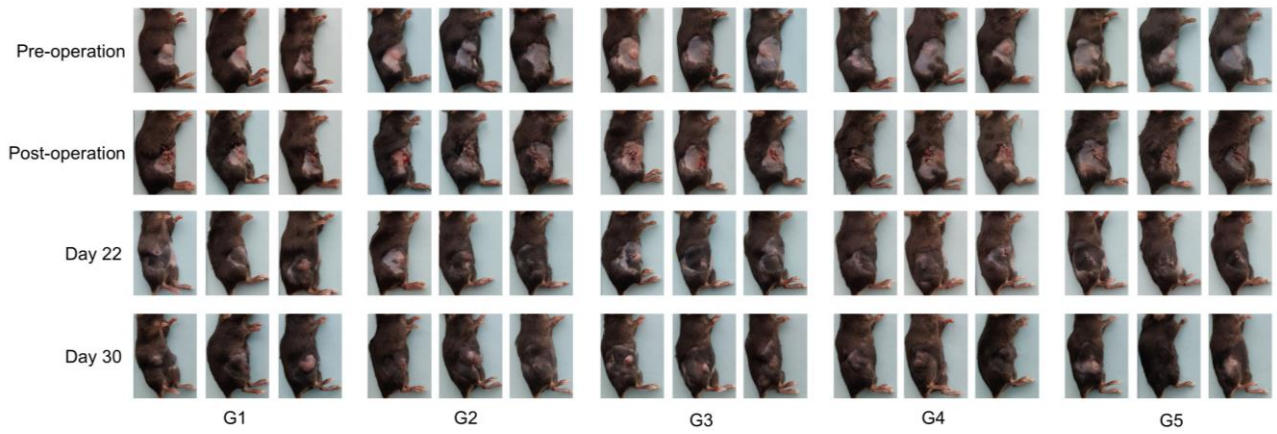

165  
166 **Supplementary Figure 34.** Representative photos of primary tumor surgery and postoperative  
167 recurrence. (G1: PBS, G2: OMVs@P<sub>2</sub>O-Ads, G3: CaP-OMVs-Ads, G4: Intra-Ads, G5:  
168 CaP-OMVs@P<sub>2</sub>O-Ads).

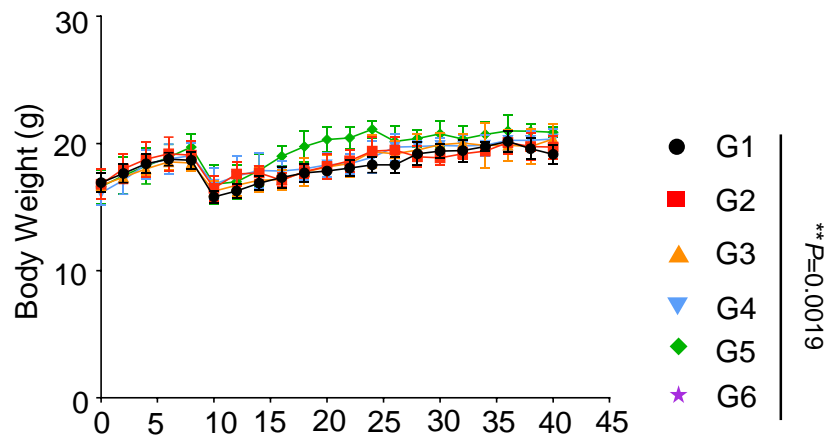

169  
 170 **Supplementary Figure 35.** Body weight changes of TC-1-bearing mice after administration of  
 171 different formulations. Data are presented as mean  $\pm$  SD (n = 5 mice). N.S. (No Significance)  $P >$   
 172 0.05 by two-tailed Student's t-test. Source data are provided as a Source Data file. (G1: PBS, G2:  
 173 OMVs@P<sub>2</sub>O-Ads, G3: CaP-OMVs-Ads, G4: Intra-Ads, G5: CaP-OMVs@P<sub>2</sub>O-Ads).

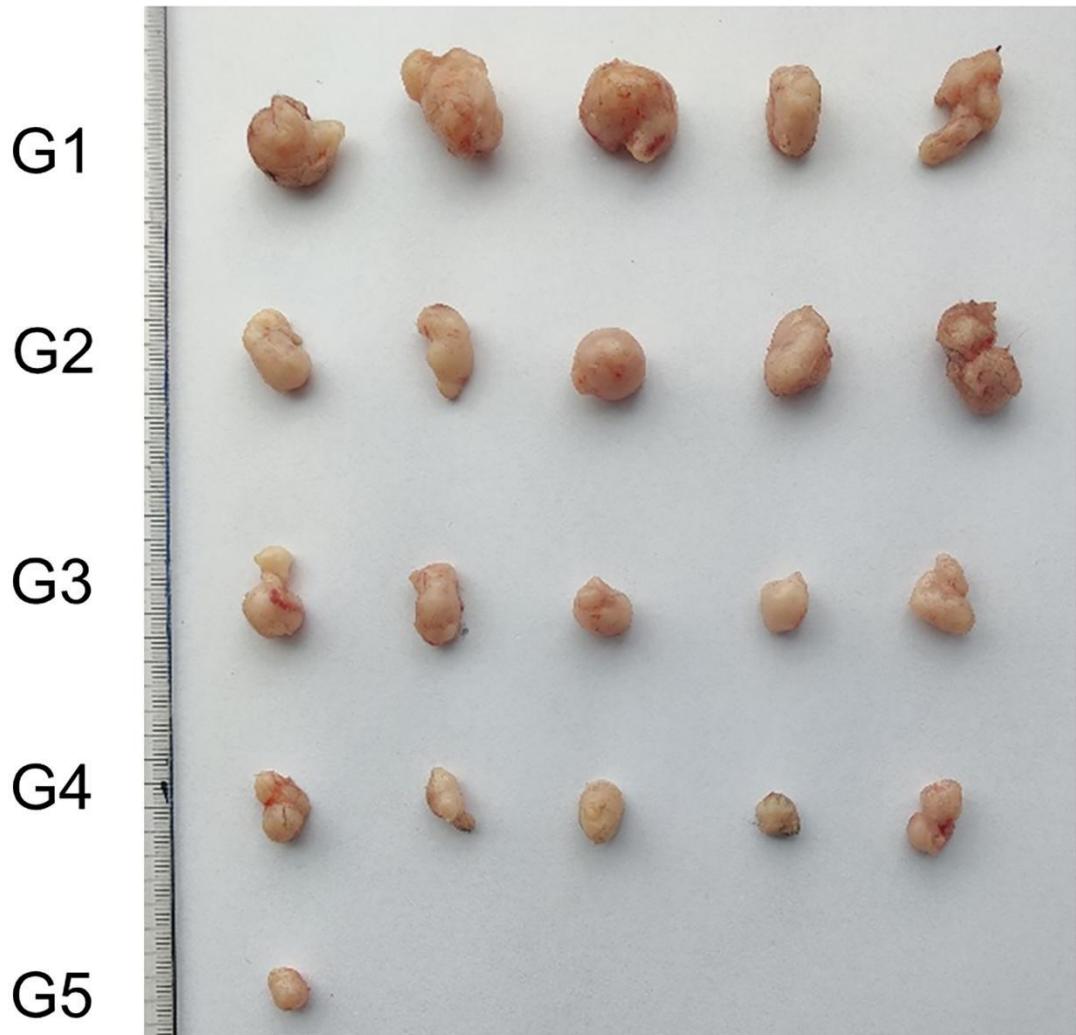

174  
175 **Supplementary Figure 36.** Images of representative primary tumors after different treatments at 45  
176 days (n=5). (G1: PBS, G2: OMVs@P<sub>2</sub>O-Ads, G3: CaP-OMVs-Ads, G4: Intra-Ads, G5:  
177 CaP-OMVs@P<sub>2</sub>O-Ads).

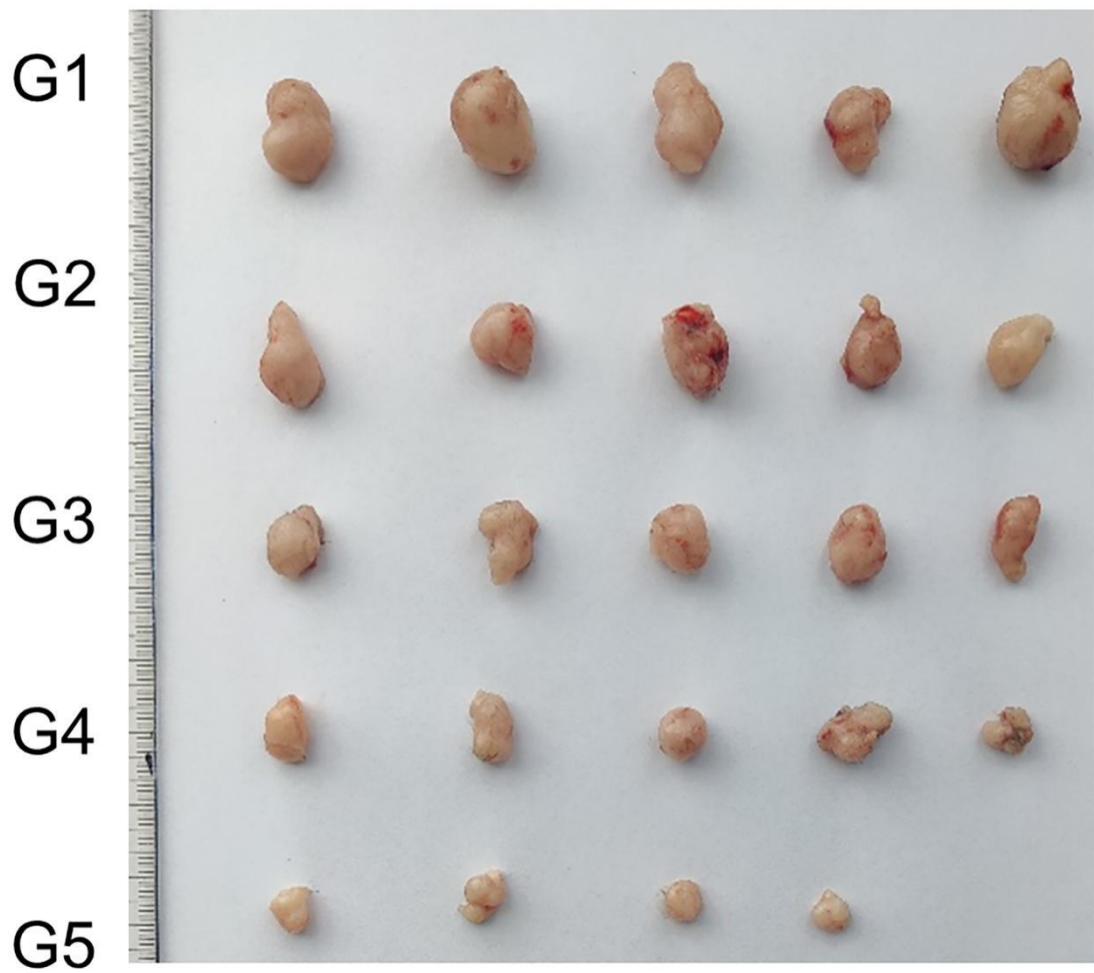

178  
179 **Supplementary Figure 37.** Images of representative distant tumors after different treatments at 45  
180 days (n=5). (G1: PBS, G2: OMVs@P<sub>2</sub>O-Ads, G3: CaP-OMVs-Ads, G4: Intra-Ads, G5:  
181 CaP-OMVs@P<sub>2</sub>O-Ads).

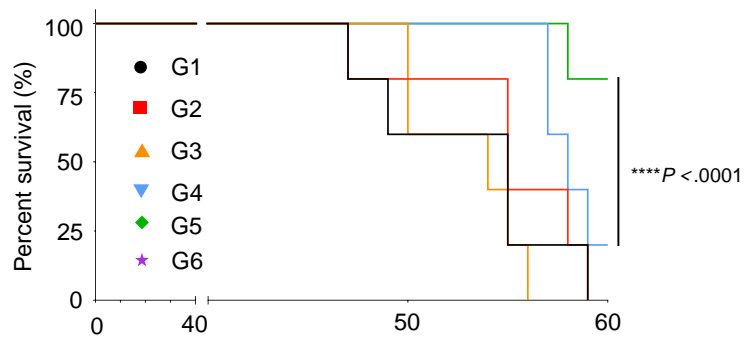

182  
 183 **Supplementary Figure 38.** Survival curves for treated bodies. Data are presented as mean  $\pm$  SD (n  
 184 = 5 mice). \*\*\*\* $P < 0.001$  by two-tailed Student's t-test. Source data are provided as a Source Data  
 185 file. (G1: PBS, G2: OMVs@P<sub>2</sub>O-Ads, G3: CaP-OMVs-Ads, G4: Intra-Ads, G5:  
 186 CaP-OMVs@P<sub>2</sub>O-Ad)

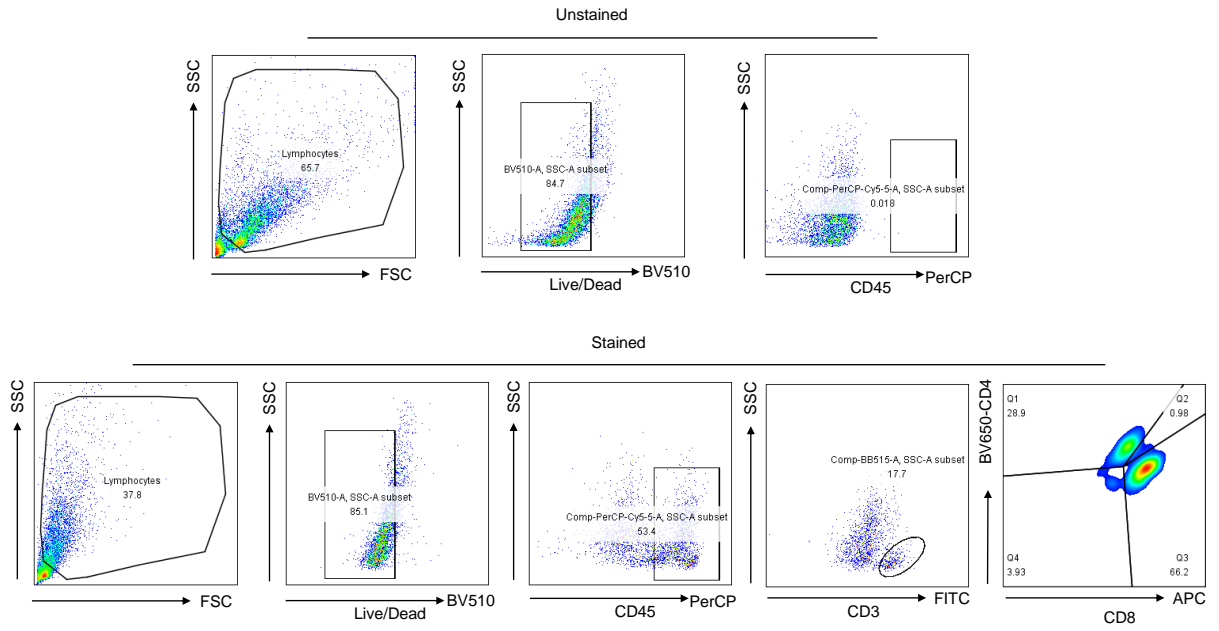

187  
 188 **Supplementary Figure 39.** The gating strategy of CD8<sup>+</sup> T cells (CD45<sup>+</sup>CD3<sup>+</sup>CD8<sup>+</sup>) in the tumor.  
 189 (cf. Figure 5d and Supplementary Figures 14 and 24)



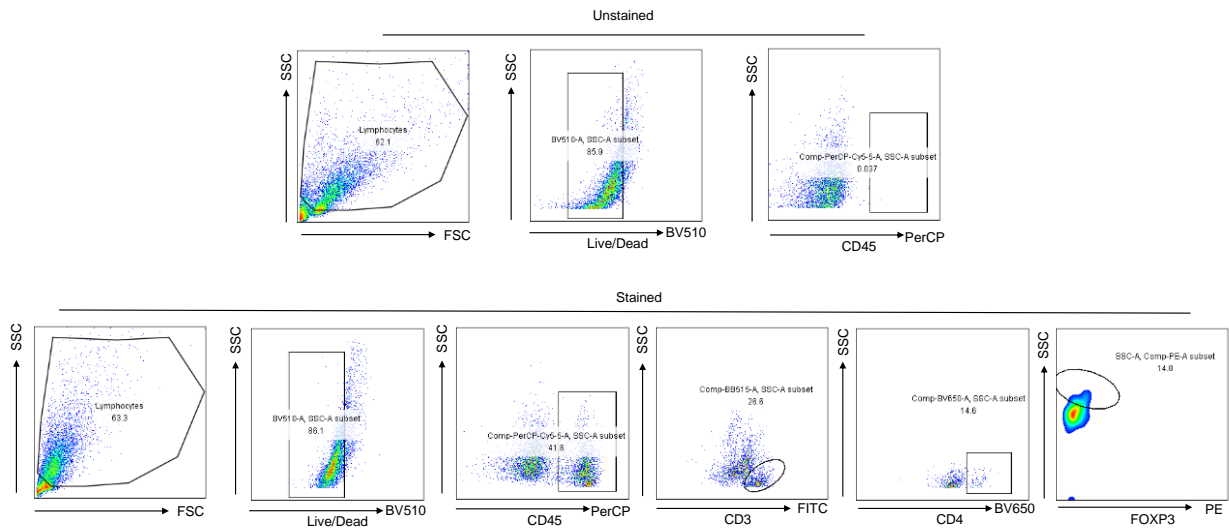

190  
 191 **Supplementary Figure 40.** The gating strategy of Treg cells ( $CD45^+CD3^+CD4^+FOXP3^+$ ) in the  
 192 tumor. (cf. Figure 5e)

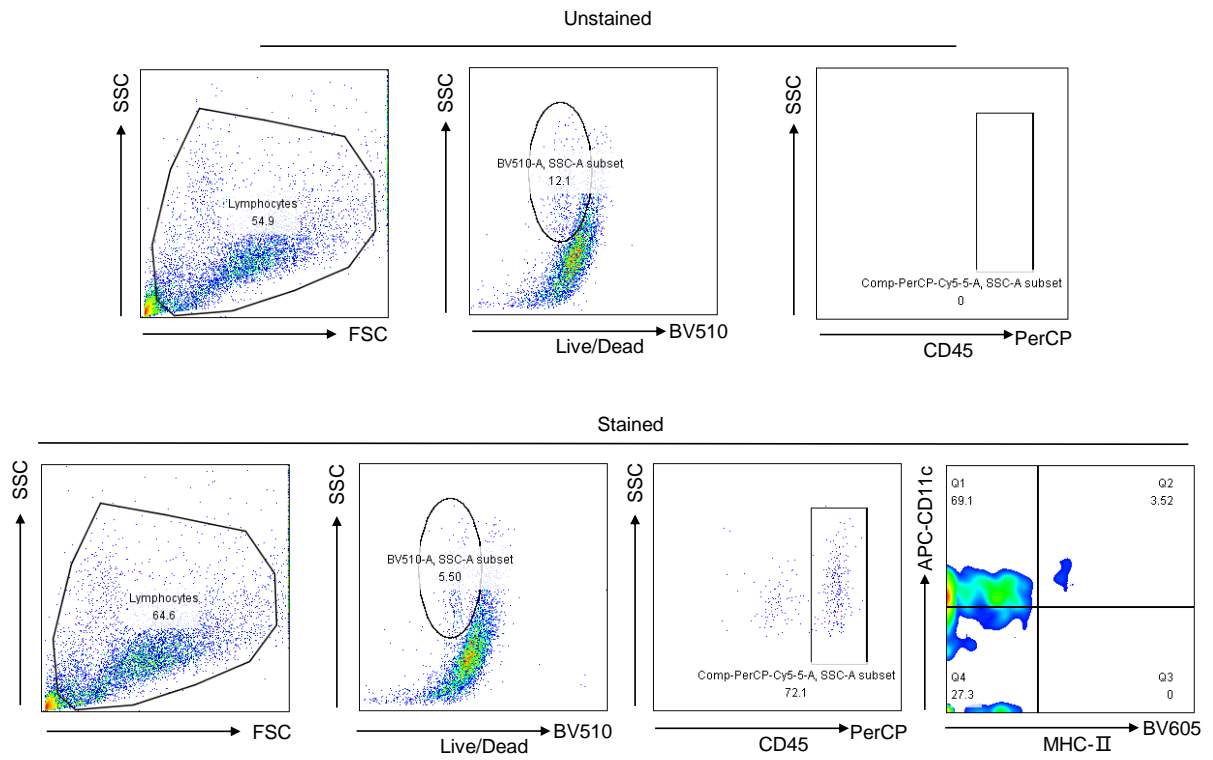

193

194 **Supplementary Figure 41.** The gating strategy of MHC-II<sup>+</sup> DC cells (CD45<sup>+</sup>CD11c<sup>+</sup>MHC-II<sup>+</sup>) in

195 the tumor. (cf. Figure 5f)

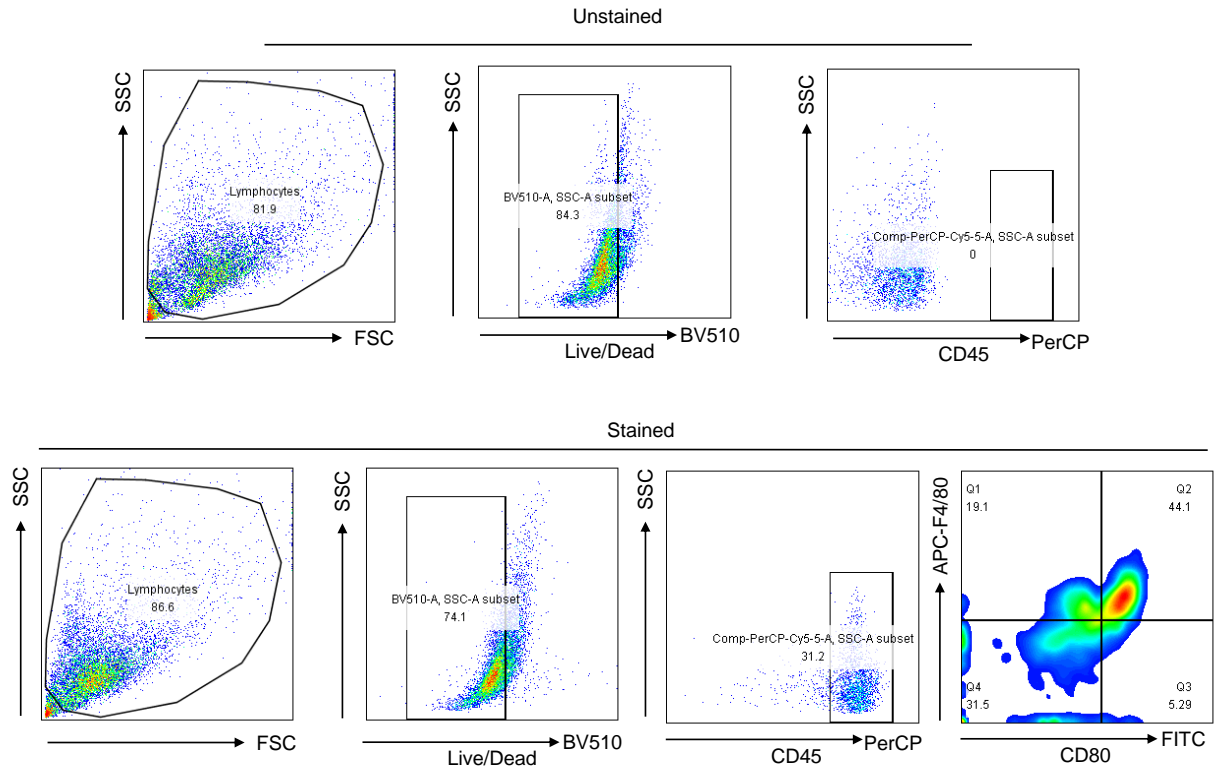

196  
 197 **Supplementary Figure 42.** The gating strategy of M1-like macrophages ( $CD45^+F4/80^+CD80^+$ ) in  
 198 tumor. (cf. Supplementary Figure 26)

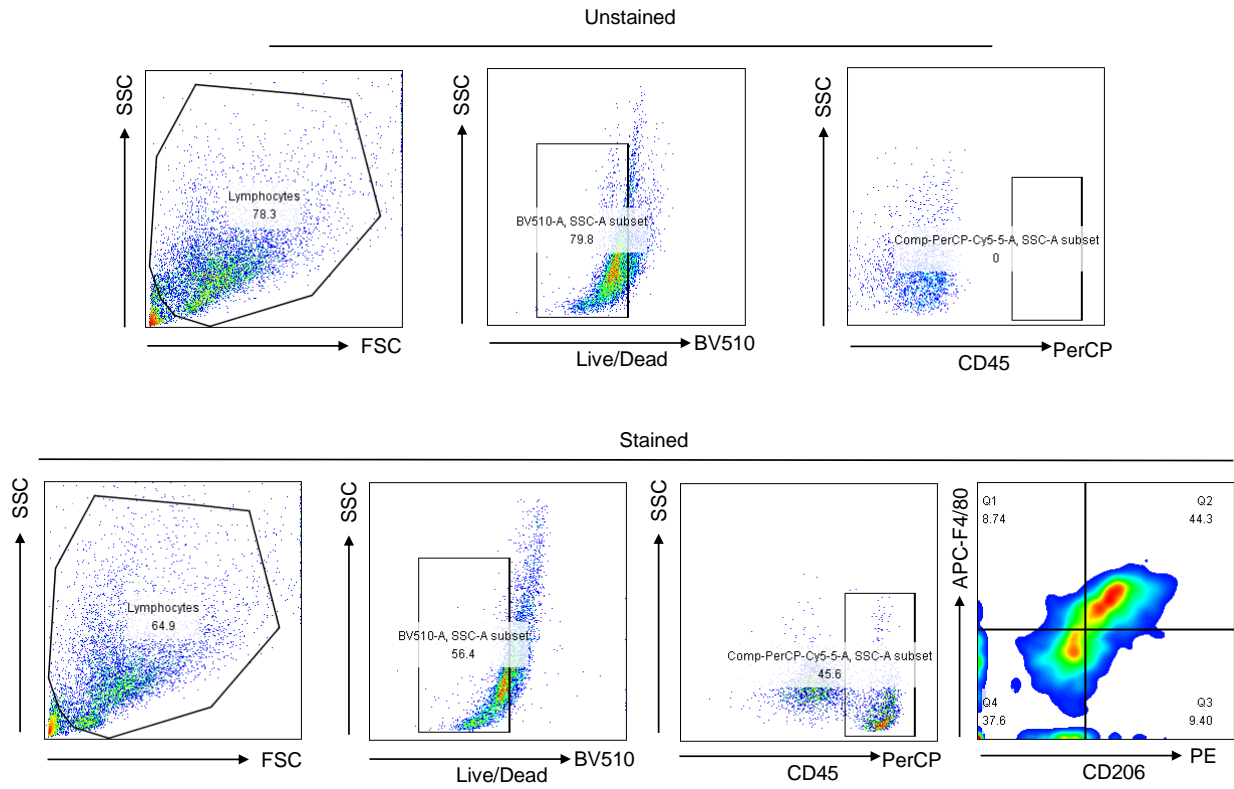

199  
 200 **Supplementary Figure 43.** The gating strategy of M2-like macrophages ( $CD45^+F4/80^+CD206^+$ ) in  
 201 tumor. (cf. Supplementary Figure 28)

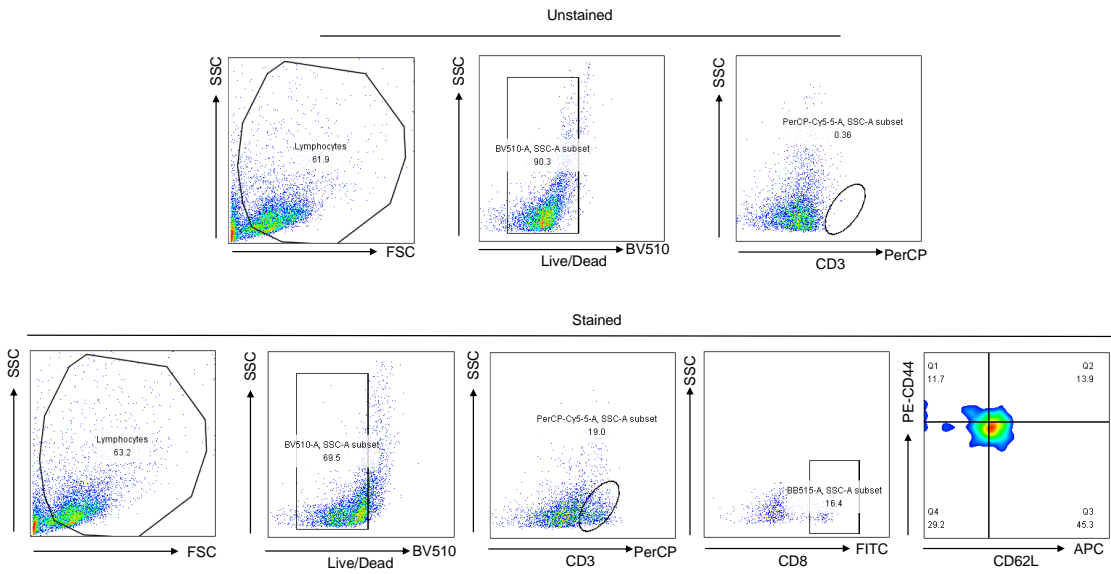

202  
 203 **Supplementary Figure 44.** The gating strategy of effector memory T cells ( $CD3^+ CD8^+ CD62L^-$   
 204  $CD44^+$ ) in spleen. (cf. Supplementary Figure 30)

205 **Supplementary Tables**206 **Supplementary Table 1. Information on antibodies used in this study**

| <b>Name</b>                                           | <b>Dilution</b> | <b>Validation</b> | <b>Company name</b> | <b>catalog number</b> | <b>Clone number</b> |
|-------------------------------------------------------|-----------------|-------------------|---------------------|-----------------------|---------------------|
| LC3B pAb                                              | 1:1000          | WB                | ABCLONAL            | A5601                 | No                  |
| SQSTM1/p62                                            | 1:100           | IF                | ABCLONAL            | A11247                | No                  |
| LC3B pAb                                              | 1:100           | IF                | ABCLONAL            | A11282                | No                  |
| CD8b<br>Antibody                                      | 1:100           | IF                | Abmart Inc.         | PK12778               | No                  |
| CD45<br>Antibody                                      | 1:250           | Flow              | Biolegend           | 103130                | 30-F11              |
| Fixable<br>Viability<br>Stain 510                     | 1:250           | Flow              | BD Biosciences      | 564406                | No                  |
| BV650 Rat<br>Anti-Mouse<br>IFN- $\gamma$ (XMG1<br>.2) | 1:250           | Flow              | BD Biosciences      | 563854                | XMG1.2              |
| BV605 Rat<br>Anti-Mouse<br>I-A/I-E(M5/1<br>14.15.2 )  | 1:250           | Flow              | BD Biosciences      | 563413                | M5/114.15.2         |
| CD3<br>Antibody                                       | 1:250           | Flow              | Biolegend           | 100204                | 17A2                |
| CD8a<br>Antibody                                      | 1:250           | Flow              | Biolegend           | 100712                | 53-6.7              |
| FOXP3<br>Antibody                                     | 1:250           | Flow              | Biolegend           | 126404                | MF-14               |
| CD69<br>Antibody                                      | 1:250           | Flow              | BD Biosciences      | 562920                | H1.2F3              |

|                    |       |           |                |        |             |
|--------------------|-------|-----------|----------------|--------|-------------|
| MHC-II<br>Antibody | 1:250 | Flow      | BD Biosciences | 563413 | M5/114.15.2 |
| CD11c<br>Antibody  | 1:250 | Flow      | Biolegend      | 117324 | N418        |
| F4/80<br>Antibody  | 1:250 | Flow      | Biolegend      | 123118 | BM8         |
| CD62L<br>Antibody  | 1:250 | Flow      | Biolegend      | 104428 | MEL-14      |
| CD44<br>Antibody   | 1:250 | Flow      | Biolegend      | 103008 | IM7         |
| CD80<br>Antibody   | 1:250 | Flow      | Biolegend      | 104714 | 16-10A1     |
| CD206<br>Antibody  | 1:250 | Flow      | Biolegend      | 141706 | C068C2      |
| CD4<br>Antibody    | 1:250 | Flow      | BD Biosciences | 563232 | GK1.5       |
| CD80<br>Antibody   | 1:250 | Flow      | Biolegend      | 104706 | 16-10A1     |
| MOUSE<br>CD8a      | 5mg   | Injection | BIOXCELL       | BP0061 | No          |
