# Supplementary material for: Engineered bacterial outer membrane vesicles encapsulating oncolytic adenoviruses enhance the efficacy of cancer virotherapy by augmenting tumor cell autophagy
Source: PubMed Central journal article supplement (PMC10203215; doi:10.1038/s41467-023-38679-z), 2023-05-22
Supplement: 41467_2023_38679_MOESM2_ESM.pdf [file 41467_2023_38679_MOESM2_ESM.pdf]

## Peer Review File

---

Engineered bacterial outer membrane vesicles encapsulating oncolytic adenoviruses enhance the efficacy of cancer virotherapy by augmenting tumor cell autophagy

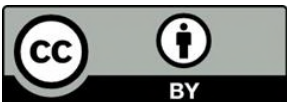

**Open Access** This file is licensed under a Creative Commons Attribution 4.0 International License, which permits use, sharing, adaptation, distribution and reproduction in any medium or format, as long as you give appropriate credit to the original author(s) and the source, provide a link to the Creative Commons license, and indicate if changes were made. In the cases where the authors are anonymous, such as is the case for the reports of anonymous peer reviewers, author attribution should be to 'Anonymous Referee' followed by a clear attribution to the source work. The images or other third party material in this file are included in the article's Creative Commons license, unless indicated otherwise in a credit line to the material. If material is not included in the article's Creative Commons license and your intended use is not permitted by statutory regulation or exceeds the permitted use, you will need to obtain permission directly from the copyright holder. To view a copy of this license, visit <http://creativecommons.org/licenses/by/4.0/>.

## REVIEWER COMMENTS

Reviewer #1 (Remarks to the Author): with expertise in oncolytic viruses, cancer immunology

This manuscript reports on the use of Outer Membrane Vesicles derived from E-Coli and containing P2O as a delivery vehicle for an Adenovirus. The concept of using these OMV to shield the virus from immune neutralization is very interesting.

However, as written at the moment, the manuscript lacks sufficient experimental detail, is poorly written in terms of what experiments were done and how and the data do not address the mechanisms by which OMV protect Ad from, for example, neutralizing antibodies.

I have made some representative comments about how the first two Figures (Figures 2&3)- because there is no Figure 1- could be improved in terms of explanation, clarification, experimental detail and statistical analysis. Similar points can be raised for the remaining 4 Figures and for the additional 27 Supplemental Figures.

There is no Figure 1.

Figure 2A: Unclear as to what we are seeing and what we are supposed to be seeing in this Figure. How many Ad are encapsulated in the OMVs@P2O-Ads?

Figure 2C: SDS Page does not show specificity of the 70KDa P2O and the loading of the lanes is different.

Figure 2D: Experimental details need to be provided.

Figure 2E: Needs to be bigger and explanation of what the arrows are showing.

Figure 2i: needs experimental detail.

Figure 2J should be quantified with statistical analysis.

Figure 3A: Need to show multiple mice. Need experimental detail.

Figure 3C needs error bars for statistical relevance and the legend needs experimental detail.

Figure 3D: n=6 in the Legend is not reflected in the Figure where n=4.

And so on.

Reviewer #2 (Remarks to the Author): with expertise in oncolytic viruses, autophagy

Ban and colleagues provide a report detailing the construction of biomineral engineered OMVs-encapsulating oncolytic adenovirus that exhibit enhanced antitumor efficacy. It was mainly dependent on overactivated autophagy. Some areas where improvements can be made include:

Major concerns:

1. Fig 2f/4f: Grey-scale analysis should be performed, so that the LC3-II/LC3-I ratio can be calculated and statistically analyzed.
2. Fig 3f-k: Since immune response is a dynamic process, from innate immunity to T cell mediated

immunity and B cell mediated immunity, so it is critical to specify at what time point did they collect the tumor samples and explain why they choose this time point.

3. Fig 3j: Grouping information and FDR should also be presented in the GSEA figure. Unexpectedly, the pathway "Activation of immune response" is not included in Fig S11. The authors should explain the representativeness of choosing this pathway.

4. Fig 3k: The individual variations among the three tested samples in OMVs@P2O-Ads group are much too large. This kind of variation severely compromise the accuracy of the data.

5. Fig S11: Most of the GSEA enriched pathways are related to B cells, suggesting that the immune response induced by OMVs@P2O-Ads seems to be mediated by B cells, but not T cells. As far as we know, antitumor immunity is mostly mediated by T cells. Thus, it would be better for the authors to explain why they did not study B cell mediated immunity. Perhaps 18 days post Ads inoculation is too late to monitor the T cell immunity.

6. Fig S13/S14 are extremely important and should be presented in Fig 4. What kind of fluorescent dye did the authors used in Fig S13? This information should be provided in figure legends.

7. Fig 5c: Large amount of tiny green spots, which are unlikely to be normal CD8 staining, are shown in G5 and G6. The authors would be better to provide explanation.

8. Fig 5: The authors try to demonstrate that the antitumor efficacy of CaP-OMVs@P2O-Ads depend on the activation of CD8 T cells. In this case, more solid evidences, including the activation status of CD8 T cells (CD44 and CD69 expression), the tumor killing activity of CD8 T cells (co-culture assay), and dependency of CD8 T cells (depleting CD8 with antibodies), should be provided.

9. Fig 5d-f: The flow cytometry was not well performed. Large amount of death cells leads to serious unspecific staining, which adversely affect the interpretation and quantification of the data. The authors should use live/dead dyes to exclude death cells and debris.

10. Fig 5f: Since most, if not all, antigen presenting cells (APCs) express CD80 and CD86, these two markers are not specific enough to identify DCs. The authors should use CD11c and MHCII, instead.

11. Discussion section is missing in the current manuscript.

Minor concerns:

1. The language of the paper could be improved with some editing.

2. It would be better to have an introduction of the advantages and disadvantages of bacterial outer membrane vesicles. Are OMVs better than other nanomaterials? Are there any potential safety concerns?

3. Figure 1 is missing.

4. Fig 2g is missing.

5. Fig 2j: What do G1~G6 represent? The authors should mention this information in the figure legends.

6. Fig 2k should be mentioned at least once in the manuscript.

7. Fig S7: Only 6 columns are presented, but x-axis has 8 groups.

8. Fig S8/5b/6c: What does "Rr=6/6" or "Rr=5/5" mean?

9. Fig S10: What do G1~G6 represent here. Are they the same with Fig S9? The authors should mention this information in the figure legends.

10. The authors should explain why they use TC-1-hCD46. Indeed, hCD46 is the receptor for adenovirus.

11. Misspell: "wight" in section 2.2

12. Fig 3a: The authors ought to give a brief introduction of DiR dye.

13. Figure 4: It would be better for the authors to explain why CaP-OMVs exhibit better tumor selectivity than OMVs.

14. Fig 4b: What do C, O, P, S, Ca, and Ca+P stand for?

15. Fig S22-23: Gating strategies should also be presented.

16. Fig S9/S16/S17/S24/3c/: What do the dotted lines represent?

17. Section 2.5: Some OVVs in clinical trials, including vaccinia virus and reovirus, are systemically delivered. The authors should mention this and compare the CaP-OMVs technology with these intravenous OVVs.

18. Section 3: What dose "the oncolytic Ads extracted from E. coli" mean? Ads is grown in HEK293 cells?

Reviewer #3 (Remarks to the Author): with expertise in outer membrane vesicles, immunotherapy

In the current study, the authors design and develop a modified oncolytic adenovirus to address the intrinsic drawbacks of the virus. They used biomineral bacterial outer membrane vesicles encapsulated adenovirus to stimulate autophagy and antitumor immunity. The integrated immunotherapy is timely and critical for improving the clinical applications of the oncologic adenovirus and will attract significant attentions from broad readership. There are some important issues the authors should consider to clarify or improve in the revised version.

1. The logic to integrate various components is rather weak and it is recommended for the authors to clarify in the manuscript. Are these components are replaceable or necessary? It is a complicated system and it is hardly be treated as composite microbe. It is recommended to change the word with nanocomposite or nanosystem.
2. How the adenovirus loaded into OMV? What is the efficacy and any improvement have been tried?
3. Autophagy-overactivated is not proper expression, since overactivated action infers to uncontrolled process and may lead to severe side effects.
4. Quantitative measurement of pyranose oxidase in critical in vivo. What is the contribution for this enzyme for immune activation?
5. The scholarly presentation needs to further improve, such as no OV definition provided in the manuscript.
6. For the immune activation experiments, various critical steps are missing to generate a concrete conclusion of cascade antitumor activation.

Reviewer #4 (Remarks to the Author): with expertise in oncolytic viruses, autophagy, nanotherapy.

This is a meaningful work for the present autophagy-cascade-boosted immunotherapeutic method. The authors stated that OMVs@P2O

promoted Ads replication and resulted in Ads-overactivated autophagy, further remolded immunosuppressive TME. However, several problems that must be clarified need to be solved.

1. As we all known, oncolytic adenovirus enters tumor cells through CAR receptor to play an anti-tumor role. What mechanism does OMVs@P2O or OMVs@P2O-Ads enter tumor cells through? Does it have practical significance in tumor cells with high or low CAR expression?
2. The reason of the low intratumoral content of intravenous-delivered Ads is that the higher level of anti-adenovirus antibody in human body eliminates the exogenous injected Ads. Can OMVs@P2O or OMVs@P2O-Ads effectively avoid the elimination of neutralizing antibodies? Whether the expression level of anti-adenovirus antibody has been improved in the mouse model in advance? This is a very necessary experiment.
3. Infection with oncolytic viruses leads to activation of type I IFN signaling pathways, which are crucial in oncolytic virus-mediated antitumor immunity. The authors stated that OMVs@P2O promoted Ads replication. Is this pathway activated to a greater extent by OMVs@P2O?
4. In vivo experiment on OMVs@P2O-Ads or CaP-OMVs@P2O-Ads regulating tumor immune microenvironment is not enough. The innate and adaptive immune cells, as well as the activation and exhausted markers of T cells, need to be detected.

To sum up, my review opinion is that unless the authors can completely and effectively supplement the above experiments, it is unacceptable.

1 **Responses to the reviewers' comments**

2 **Reviewer #1:** This manuscript reports on the use of Outer Membrane Vesicles derived from *E-Coli*  
3 and containing P<sub>2</sub>O as a delivery vehicle for an Adenovirus. The concept of using these OMV to  
4 shield the virus from immune neutralization is very interesting. However, as written at the moment,  
5 the manuscript lacks sufficient experimental detail, is poorly written in terms of what experiments  
6 were done and how and the data do not address the mechanisms by which OMV protect Ad from,  
7 for example, neutralizing antibodies. I have made some representative comments about how the  
8 first two Figures (Figures 2&3)- because there is no Figure 1- could be improved in terms of  
9 explanation, clarification, experimental detail and statistical analysis. Similar points can be raised  
10 for the remaining 4 Figures and for the additional 27 Supplemental Figures.

11 **Question 1:** There is no Figure 1.

12 **Response:** We are sorry that Figure 1 had been not shown in the manuscript. We have attached  
13 Figure 1 here and added it to the revised manuscript (page 6).

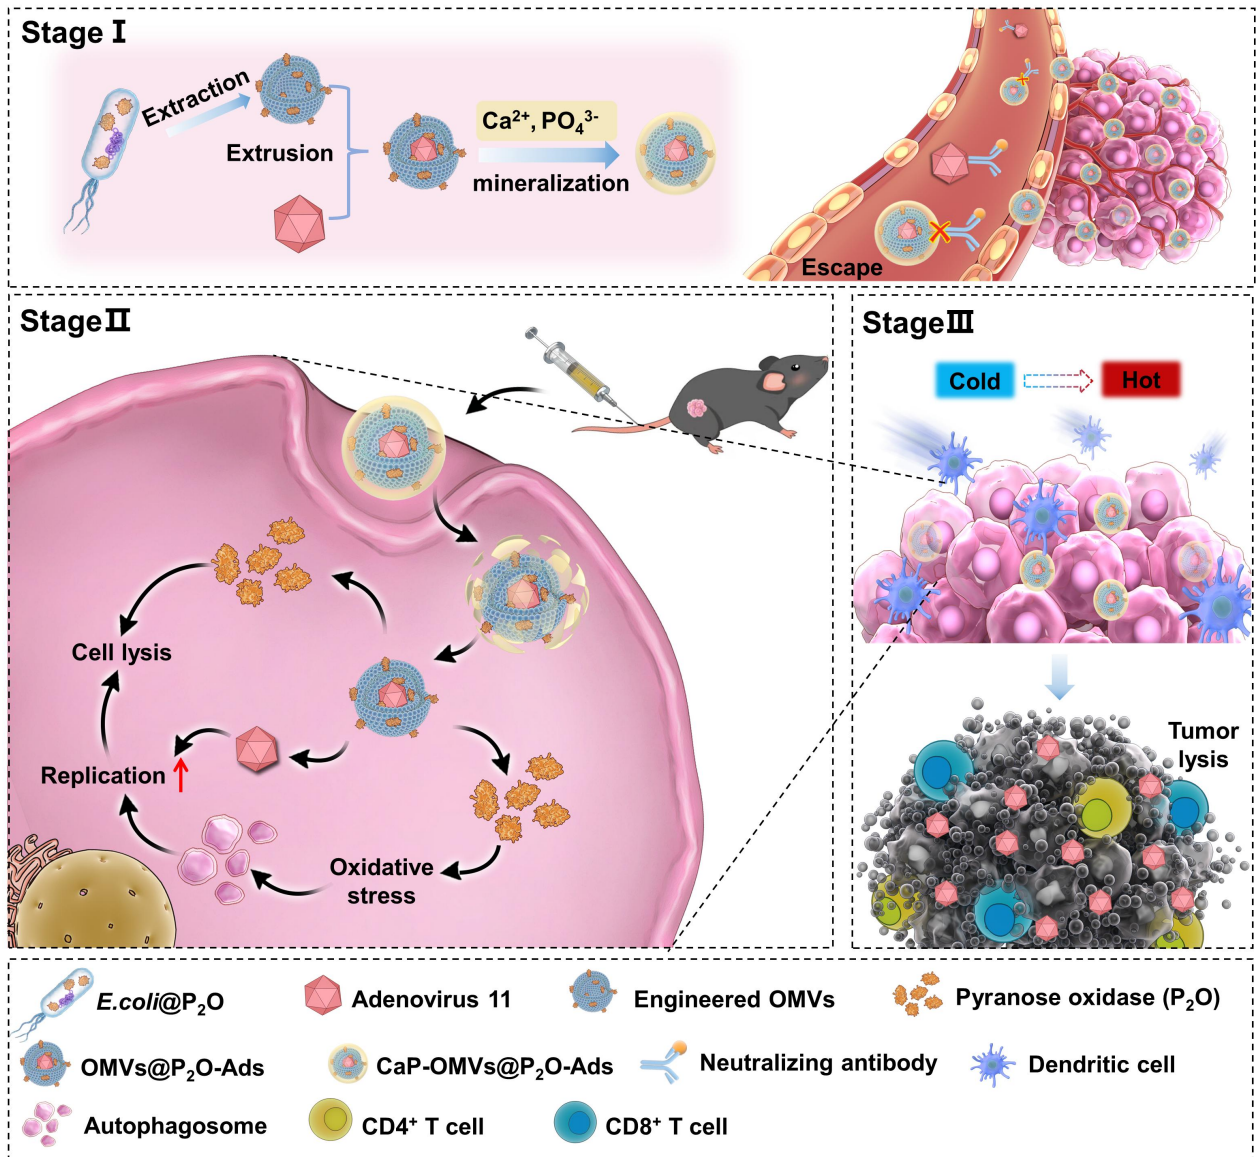

14 **Figure 1. Schematic diagram.** The biom mineralized microbial nanocomposite engineered from OV for  
 15 autophagy-cascade-augmented immunotherapy.

16 **Question 2:** Figure 2A: Unclear as to what we are seeing and what we are supposed to be seeing in  
 17 this Figure. How many Ad are encapsulated in the OMVs@ $P_2O$ -Ads?

18 **Response:** Thanks for the reviewer's kind questions. Figure 2A showed the particle size and size  
 19 distribution of Ads, OMVs@ $P_2O$  and OMVs@ $P_2O$ -Ads (measured by Malvern laser granulometer),  
 20 as well as the morphology of these under the transmission electron microscope (TEM). In TEM  
 21 images, Ads possessed a hexagonal core, and OMVs@ $P_2O$  presented a spherical shell. The  
 22 "core-shell" structure of OMVs@ $P_2O$ -Ads had been shown in Figure 2A, indicating that the  
 23 successful construction of this microbial nanocomposite. In this study, Ads themselves have a

24 steady particle size of 90-100 nm. The *E. coli*-secreted OMVs possessed an even size about 130 nm  
 25 through the extraction method. Thus, we ensure that each microbial nanocomposite contained only  
 26 one Ad particle, which are consistent with image of TEM.

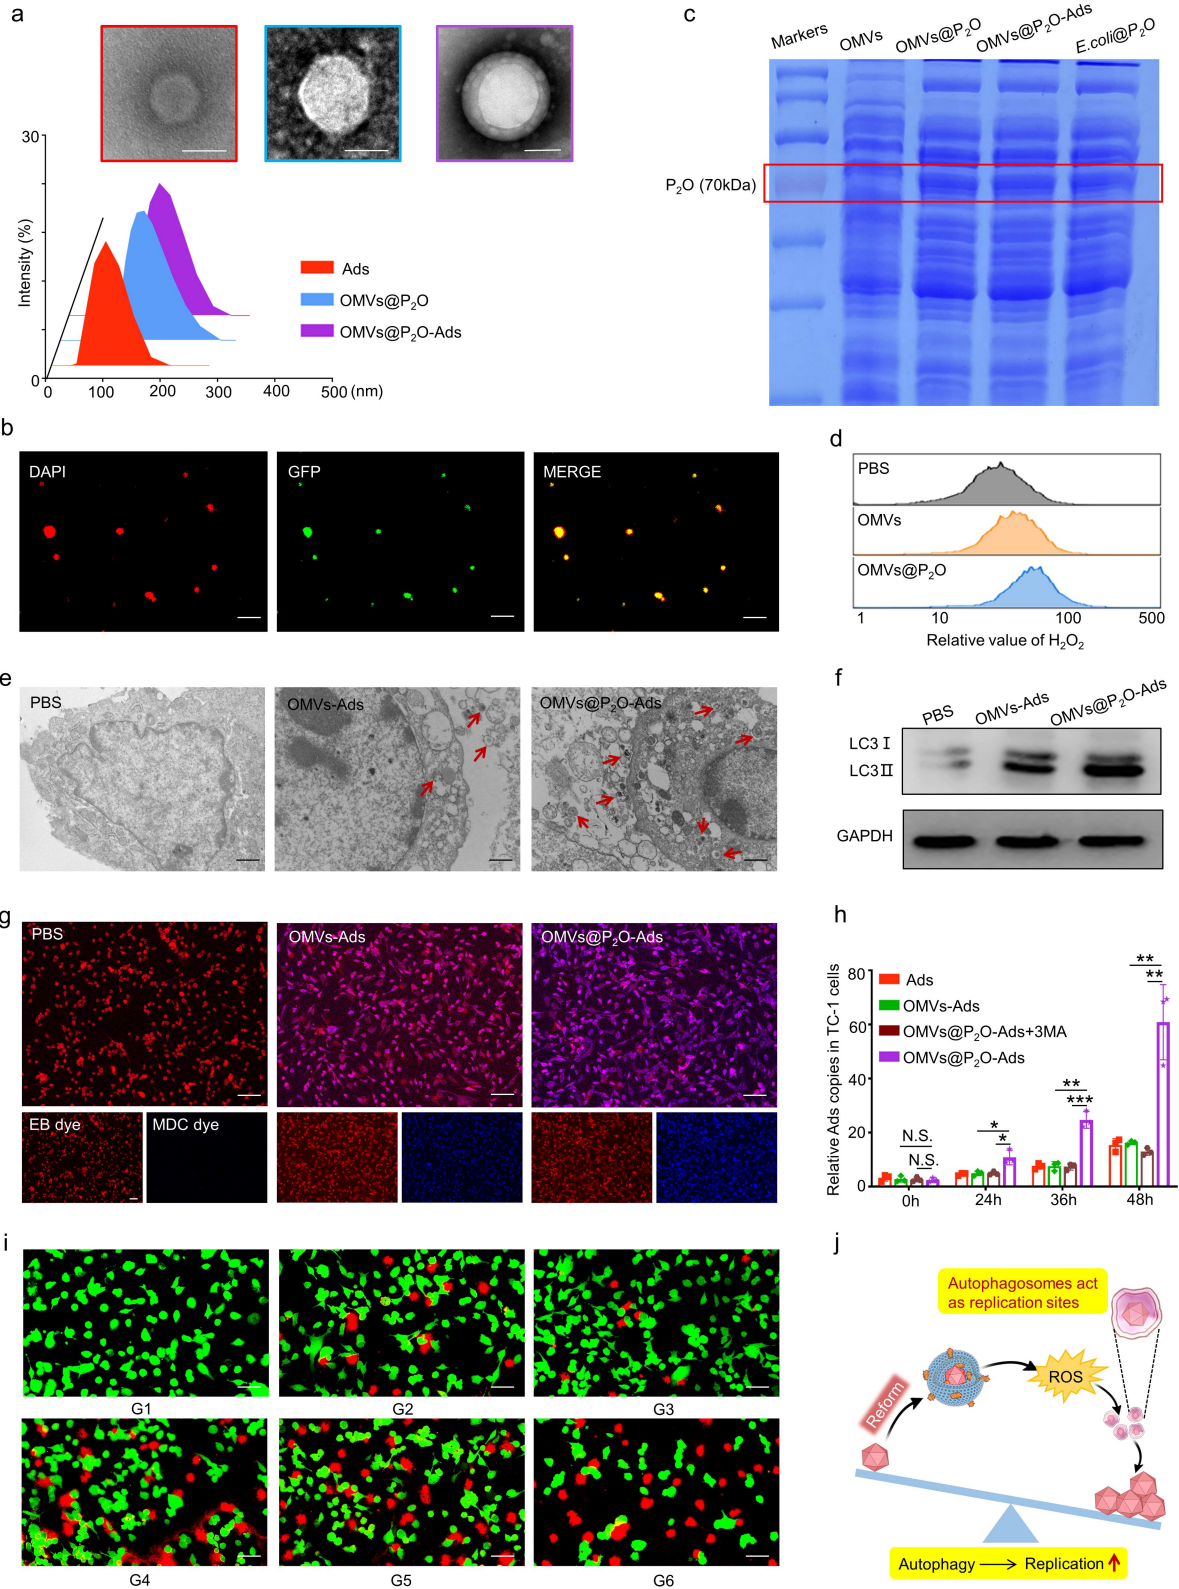

27 **Figure 2. Preparation and *in vitro* evaluation of the microbial nanocomposite.** (a) TEM and size distribution  
28 images of Ads, OMVs@P<sub>2</sub>O, and OMVs@P<sub>2</sub>O-Ads. Scale bar=100 nm. (b) CLSM images of the microbial  
29 nanocomposite. Ads were stained with DAPI dye (red) and OMVs carried a GFP marker (green). Scale bar=1 μm.  
30 (c) The expression of P<sub>2</sub>O was investigated by the SDS-PAGE method. (d) The ROS level assessment in TC-1  
31 cells by flow cytometry. (e) TEM images of autophagosomes. Scale bar=200 nm. (f) The expression of  
32 autophagy-related protein LC3-I and LC3-II by western bolt analyses. (g) CLSM images of autophagosomes.  
33 Cells were stained with EB dye (red) and autophagosomes were stained with MDC dye (blue). Scale bar=50 μm.  
34 (h) The Ads replication in TC-1 cells was quantified using real-time PCR at 0, 24, 36, and 48 h sequentially. 3MA  
35 is an autophagy inhibitor: 3-Methyladenine. (i) Cytotoxicity of different formulations in TC-1 cells by CLSM.  
36 Living cells were stained with Calcein (green) and dead cells were stained with PI (red). Scale bar=20 μm. (j)  
37 Schematic diagram of bridging ROS with oncolytic Ads replication. \**p*<0.05, \*\**p*<0.01, \*\*\**p*<0.001,  
38 \*\*\*\**p*<0.0001 versus control. G1: PBS, G2: Ads, G3: OMVs, G4: OMVs@P<sub>2</sub>O, G5: OMVs-Ads, G6:  
39 OMVs@P<sub>2</sub>O-Ads.

40 **Question 3:** Figure 2C: SDS Page does not show specificity of the 70 KDa P<sub>2</sub>O and the loading of  
41 the lanes is different.

42 **Response:** We appreciate the reviewer's comments. Pyranose oxidase (P<sub>2</sub>O) is an enzyme with a  
43 molecular mass of 70KDa. As shown in Figure 2C, compared with OMVs group, there are clearer  
44 70KDa lanes observed in OMVs@P<sub>2</sub>O, OMVs@P<sub>2</sub>O-Ads and *E. coli*@P<sub>2</sub>O groups. However, due  
45 to the limitations of SDS Page method, the expression of the P<sub>2</sub>O can't be specifically confirmed.  
46 So, in our study, a chemical chromogenic reaction approach was conducted to further verify the  
47 function of the P<sub>2</sub>O, thereby indirectly proving the existence of P<sub>2</sub>O (Figure S1- S4).

48 In our study, to ensure the rigor of SDS experiments, the total protein content of the samples from  
49 all groups was measured by BCA protein quantification kit and the loading quantity of all groups  
50 were kept in a consistent value. Here, we had re-modified experiments and obtained experimental  
51 results in the revised manuscript as follow (Figure 2C):

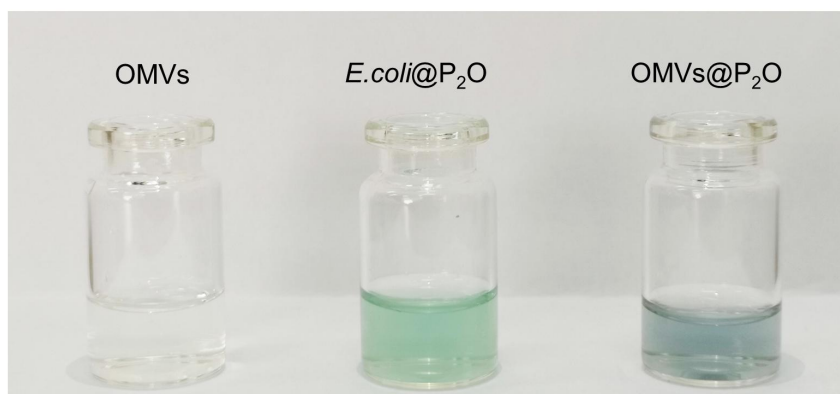

52 **Figure S1.** Qualitative analysis of P<sub>2</sub>O expression in OMVs, *E. coli*@P<sub>2</sub>O and OMVs@P<sub>2</sub>O.



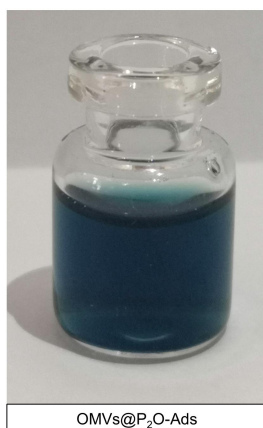

53

**Figure S2.** Qualitative analysis of P<sub>2</sub>O expression in OMVs@P<sub>2</sub>O-Ads.

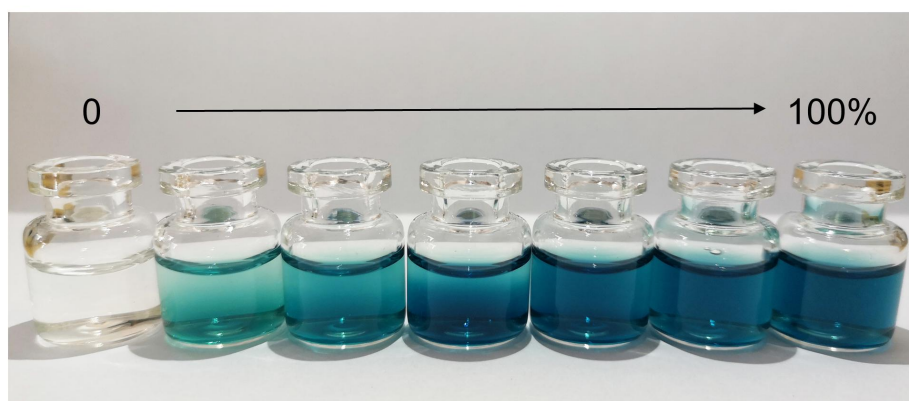

54

**Figure S3.** Qualitative analysis of different concentration P<sub>2</sub>O expression in OMVs@P<sub>2</sub>O.

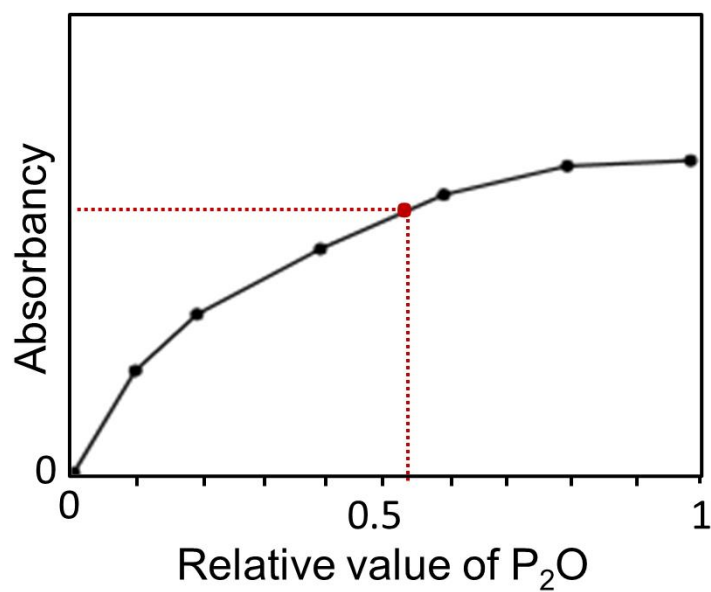

55 **Figure S4.** The function curve illustrated the relationship between the absorbance and P<sub>2</sub>O with different  
56 concentrations. The red point revealed the relative P<sub>2</sub>O concentration within the microbial nanocomposite.

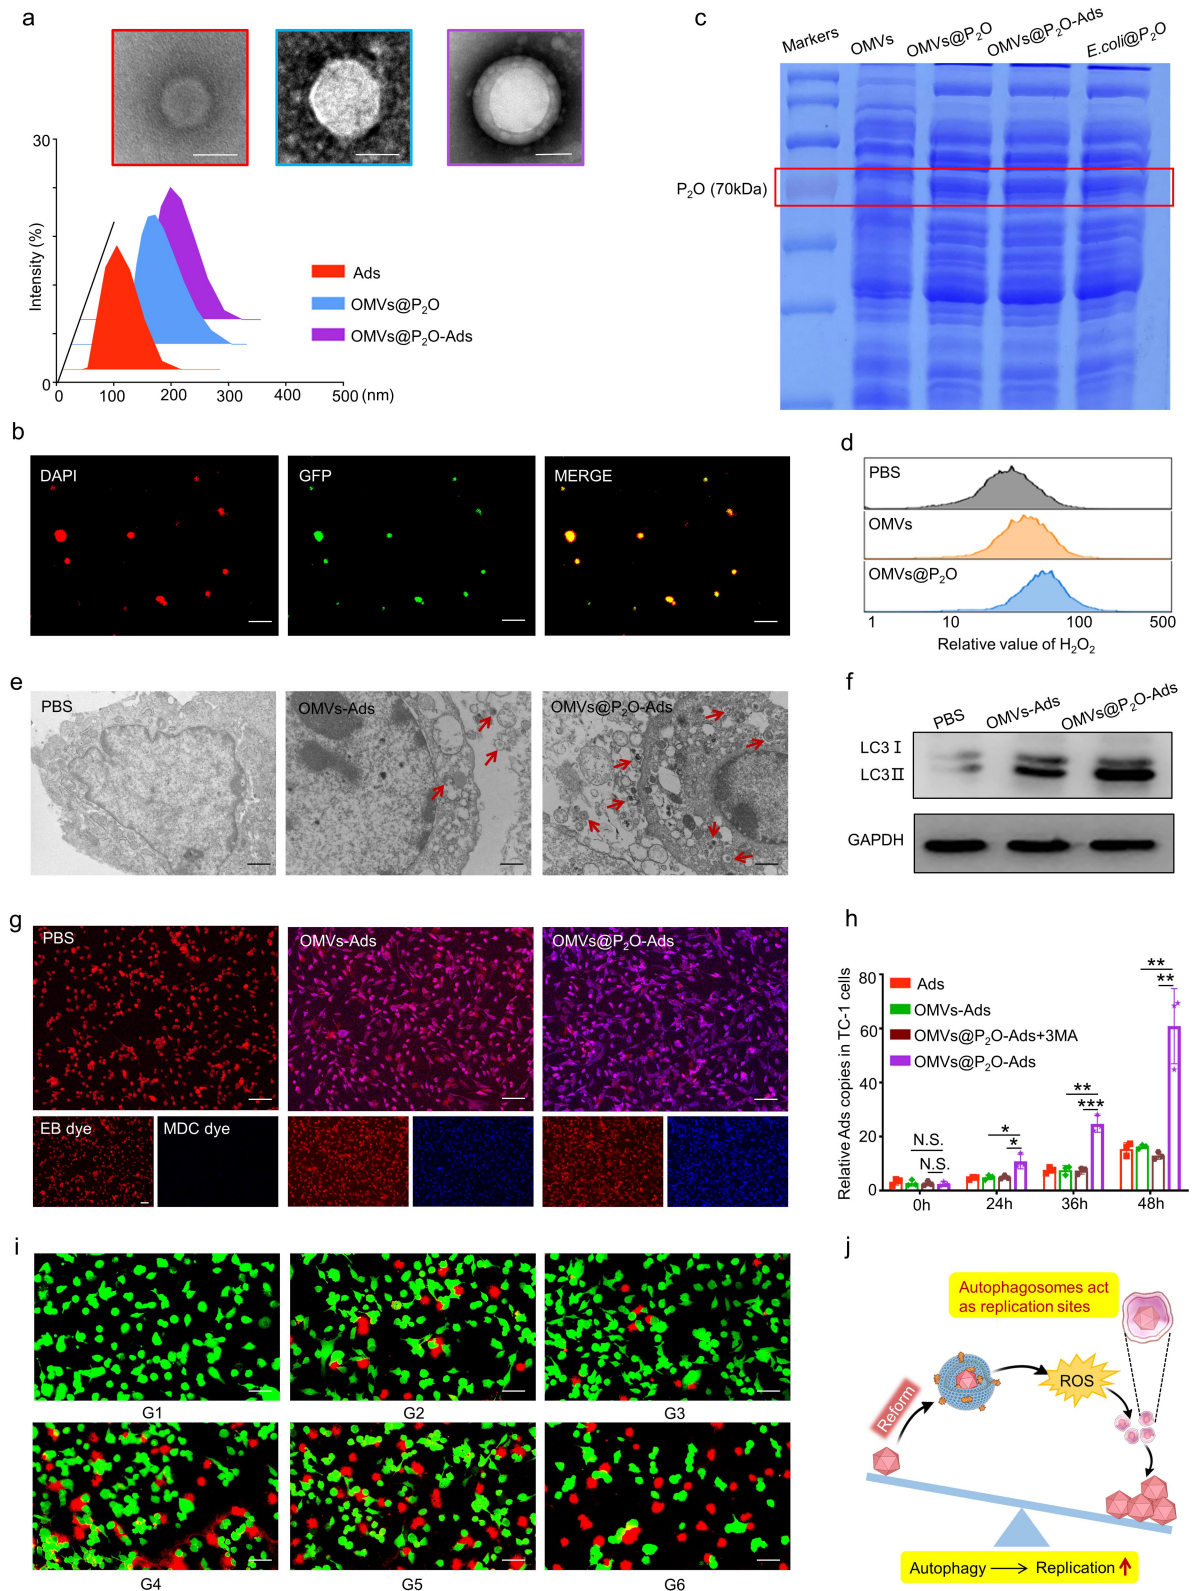

57 **Figure 2. Preparation and *in vitro* evaluation of the microbial nanocomposite.** (a) TEM and size distribution  
58 images of Ads, OMVs@P<sub>2</sub>O, and OMVs@P<sub>2</sub>O-Ads. Scale bar=100 nm. (b) CLSM images of the microbial  
59 nanocomposite. Ads were stained with DAPI dye (red) and OMVs carried a GFP marker (green). Scale bar=1 μm.  
60 (c) The expression of P<sub>2</sub>O was investigated by the SDS-PAGE method. (d) The ROS level assessment in TC-1

61 cells by flow cytometry. (e) TEM images of autophagosomes. Scale bar=200 nm. (f) The expression of  
62 autophagy-related protein LC3-I and LC3-II by western bolt analyses. (g) CLSM images of autophagosomes.  
63 Cells were stained with EB dye (red) and autophagosomes were stained with MDC dye (blue). Scale bar=50  $\mu\text{m}$ .  
64 (h) The Ads replication in TC-1 cells was quantified using real-time PCR at 0, 24, 36, and 48 h sequentially. 3MA  
65 is an autophagy inhibitor: 3-Methyladenine. (i) Cytotoxicity of different formulations in TC-1 cells by CLSM.  
66 Living cells were stained with Calcein (green) and dead cells were stained with PI (red). Scale bar=20  $\mu\text{m}$ . (j)  
67 Schematic diagram of bridging ROS with oncolytic Ads replication. \* $p<0.05$ , \*\* $p<0.01$ , \*\*\* $p<0.001$ ,  
68 \*\*\*\* $p<0.0001$  versus control. G1: PBS, G2: Ads, G3: OMVs, G4: OMVs@P<sub>2</sub>O, G5: OMVs-Ads, G6:  
69 OMVs@P<sub>2</sub>O-Ads.

70 **Question 4:** Figure 2D: Experimental details need to be provided.

71 **Response:** We appreciate the reviewer's comments. In the revised manuscript, this part was  
72 modified in section 4.6 as (page 23): "TC-1 mouse lung cancer cells were cultured in DMEM  
73 medium supplemented with 10% FBS, penicillin (100 U mL<sup>-1</sup>), and streptomycin (100  $\mu\text{g}$  mL<sup>-1</sup>).  
74 The cells were maintained in a humidified atmosphere of 5% CO<sub>2</sub> at 37 °C. TC-1 cells were  
75 cultured and divided into three groups (PBS, OMVs, and OMVs@P<sub>2</sub>O). After the cells occupied  
76 80% of the bottom, the medium was discarded, and the cells were rinsed twice using PBS.  
77 DCFH-DA fluorescent dye (10  $\mu\text{M}$ , 1mL) (Meilun ROS Assay Kit MA0219) was added to the  
78 blank medium working solution. The cells were then incubated at 37 °C for 1 h in the dark. Next,  
79 the medium was discarded, and the cells were rinsed with PBS again. Then, PBS, OMVs, and  
80 OMVs@P<sub>2</sub>O blank medium dispersion were added sequentially and further incubated at 37°C for 3  
81 h in the dark. After rinsing with PBS, the cells were collected, and their ROS concentration was  
82 determined by flow cytometry. The extracellular DCFH-DA has no fluorescence even after  
83 possessing the capability of crossing the cell membrane freely. After entering the cell, it can be  
84 hydrolyzed by intracellular esterase to translate into DCFH, which cannot pass through the cell  
85 membrane. In the presence of ROS, DCFH is oxidized to produce the fluorescent substance DCF  
86 (the excitation wavelength: 502nm; the emission wavelength: 530nm)."

87 **Question 5:** Figure 2E: Needs to be bigger and explanation of what the arrows are showing.

88 **Response:** We appreciate the reviewer's comments. In order to make this article more intuitive for  
89 reviewers and readers, we tried to put the equal-scaling amplifying pictures in the supplement  
90 (Figure S7).

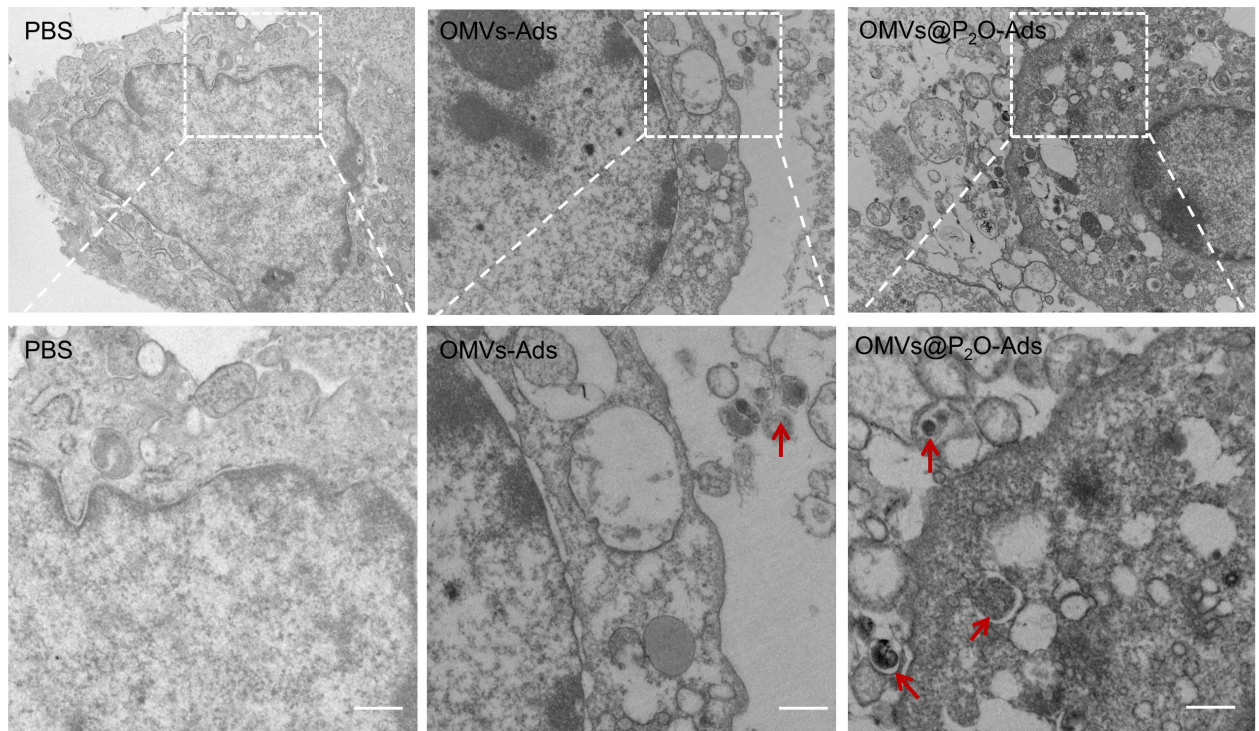

91 **Figure S7.** The equal-scaling amplifying TEM images of autophagosomes, scale bar=500 nm.

92 **Question 6:** Figure 2i: needs experimental detail.

93 **Response:** We appreciate the reviewer's comments. In the revised manuscript, this part (replaced  
 94 by Figure 2h) was modified in section 4.9 as (page 25): "TC-1 cells were cultured in cell culture  
 95 plates. After the cells occupied 80% of the bottom, the medium was sucked out with a 2 mL syringe  
 96 and washed with PBS twice. Ads, OMVs-Ads, OMVs@P<sub>2</sub>O-Ads + 3MA, and OMVs@P<sub>2</sub>O-Ads  
 97 were added to each group and incubated for 3h at 37°C. 3MA is an autophagy inhibitor:  
 98 3-Methyladenine. The drug solution was dumped out, the cells were rinsed twice with PBS, and the  
 99 same volume of blank medium was added. Plates were put in 37 °C and moved after 0, 24 h, 36 h,  
 100 and 48 h, and were placed at -80°C for three times to ensure complete cell breakdown. The  
 101 freeze-thaw solution was collected and centrifuged at 2800 rpm/min at 4°C for 0.5 h. Precipitation  
 102 was discarded, and 1% triton was added to the supernatant. Then, the liquid was pre-denatured at  
 103 98°C, and the precipitate of deformed protein was removed by centrifugation at 12000 rpm/min for  
 104 10 min. Finally, the RT-qPCR technique collected and processed the supernatant for quantitative  
 105 Ads detection. All the reagents of the RT-qPCR technique were purchased from Vazyme."

106 **Question 7:** Figure 2J should be quantified with statistical analysis.

107 **Response:** We appreciate the reviewer's comments. The statistical analysis result had been shown  
108 in Figure S10 in the revised manuscript:

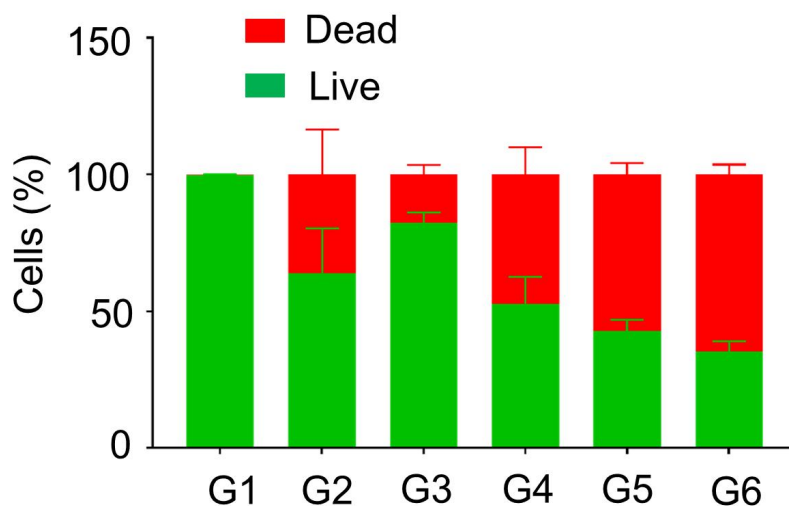

109 **Figure S10.** The statistical analysis result of live/dead cellular staining (n=3). (G1: PBS, G2: Ads, G3: OMVs, G4:  
110 OMVs@P<sub>2</sub>O, G5: OMVs-Ads, G6: OMVs@P<sub>2</sub>O-Ads).

111 **Question 8:** Figure 3A: Need to show multiple mice. Need experimental detail.

112 **Response:** We agree with the reviewer's comments. The more mice are shown below. In the revised  
113 manuscript, this part was modified in section 4.11 as (page 25):

114 “Female C57 mice were obtained from the Laboratory Animal Center of Shenyang  
115 Pharmaceutical University. The animal experiments were performed by following the Guidelines  
116 for the Care and Use of Laboratory Animals approved by the Institutional Animal Ethical Care  
117 Committee (IAEC) of Shenyang Pharmaceutical University.

118 OMVs@P<sub>2</sub>O-Ads was prepared as described in section 4.4, and an excess of DIR staining  
119 solution was subsequently added to label OMVs. The free DIR dye was removed by centrifugation  
120 at 3,000 × g for 3 min using an ultrafiltration tube with a 100 kDA pore size. DIR-labeled  
121 OMVs@P<sub>2</sub>O-Ads were injected intratumorally using Ads content of 7 × 10<sup>5</sup> PFU as a standard. DIR  
122 fluorescent imaging of the microbial nanocomposite *in vivo* in TC-1-hCD46 xenograft  
123 tumor-bearing mice by IVIS.”

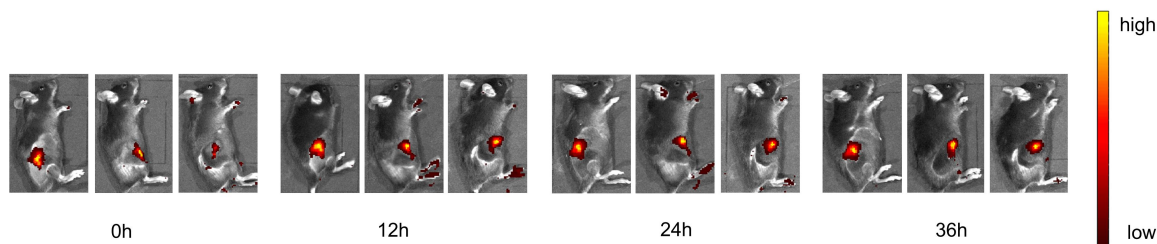

124 **Figure S11.** *In vivo* DIR fluorescent imaging of the nanocomposite in TC-1-hCD46 xenograft tumor-bearing mice  
 125 by IVIS (n=3).

126 **Question 9:** Figure 3C needs error bars for statistical relevance and the legend needs experimental  
 127 detail.

128 **Response:** We appreciate the reviewer's comments. Error bars are represented by dotted lines in  
 129 Figure 3C. To make the figure information more intuitive for reviewers and readers, we replace the  
 130 dotted lines with the traditional error bars. Furthermore, the experimental detail was attached as  
 131 follow (page 12):

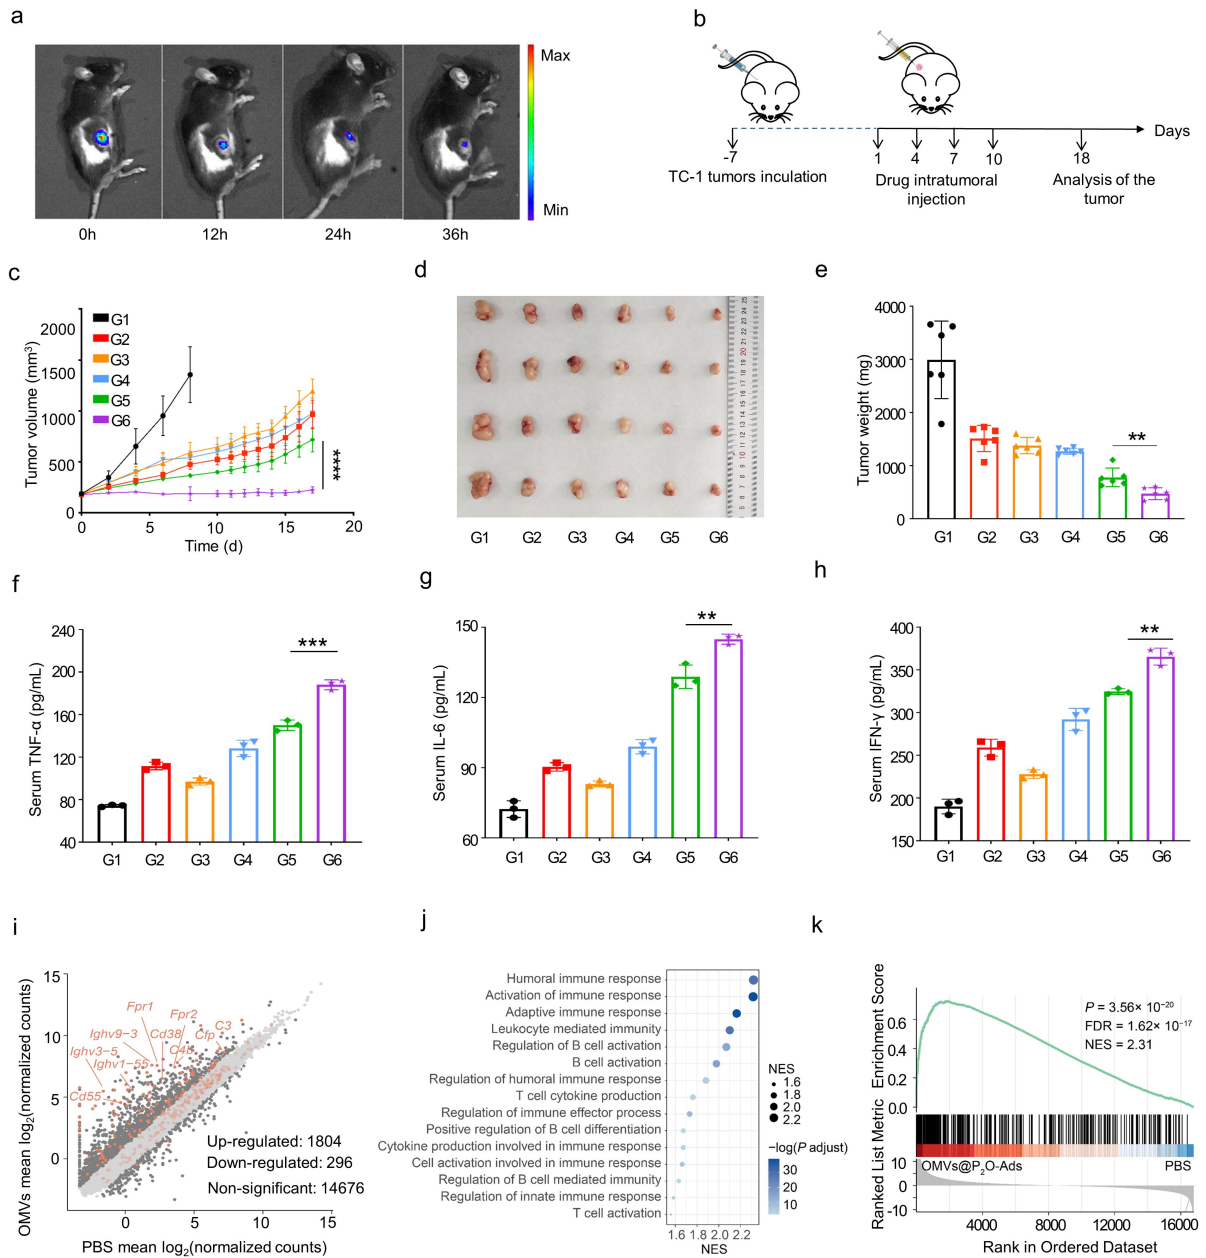

132 **Figure 3. *In vivo* oncolytic efficacy of the microbial nanocomposite.** (a) *In vivo* DIR fluorescent imaging of the  
 133 microbial nanocomposite in TC-1-hCD46 xenograft tumor-bearing mice by IVIS. (b) Schematic illustration of the  
 134 antitumor activity and immunology assessment experiments of the microbial nanocomposite using TC-1-hCD46  
 135 xenograft tumor-bearing C57 female mice model. TC-1 cells ( $10^6$ ) were subcutaneously injected into the waist of  
 136 female C57 mice, and the tumor-bearing mice were divided into six groups ( $n=6$ ). When the tumor reached  
 137 100-150  $\text{mm}^3$ , the mice were injected intratumorally with PBS, Ads ( $7 \times 10^5$  PFU), OMVs, OMVs@P<sub>2</sub>O,  
 138 OMVs-Ads ( $7 \times 10^5$  PFU), and OMVs@P<sub>2</sub>O-Ads ( $7 \times 10^5$  PFU). The drug was given every three days for four  
 139 consecutive times, the tumor volume was measured with a vernier caliper, and mice were weighed daily. (c)  
 140 Tumor volume growth profiles of C57 mice bearing TC-1 xenografts. (d) Images of representative tumors of  
 141 different treated groups on the 18<sup>th</sup> day ( $n=6$ ). (e) Statistical graph of tumor weight of different treated groups  
 142 on the 18<sup>th</sup> day ( $n=6$ ). (f-h) Images of concentration of main cytokines in serum. (i) The differential gene  
 143 expression between the samples treated with OMVs@P<sub>2</sub>O-Ads and PBS, using the absolute value of logFC greater than 1 as

144 the threshold. (j) GSEA enriched pathways of the up-regulated genes in the samples treated with  
 145 OMVs@P<sub>2</sub>O-Ads, showing immune-related terms. (k) Gene set enrichment analysis (GSEA) of the term  
 146 “Activation of immune response”, and the genes included in this pathway are highlighted in (i) with light yellow  
 147 brown. \**p*<0.05, \*\**p*<0.01, \*\*\**p*<0.001, \*\*\*\**p*<0.0001 versus control. (G1: PBS, G2: Ads, G3: OMVs, G4:  
 148 OMVs@P<sub>2</sub>O, G5: OMVs-Ads, G6: OMVs@P<sub>2</sub>O-Ads).

149 **Question 10:** Figure 3D: n=6 in the Legend is not reflected in the Figure where n=4.

150 **Response:** We are sorry that we made an error in the process of typesetting, which resulted in  
 151 Figure 3D not being fully presented. We have attached the original documents here and modified in  
 152 the revised manuscript.

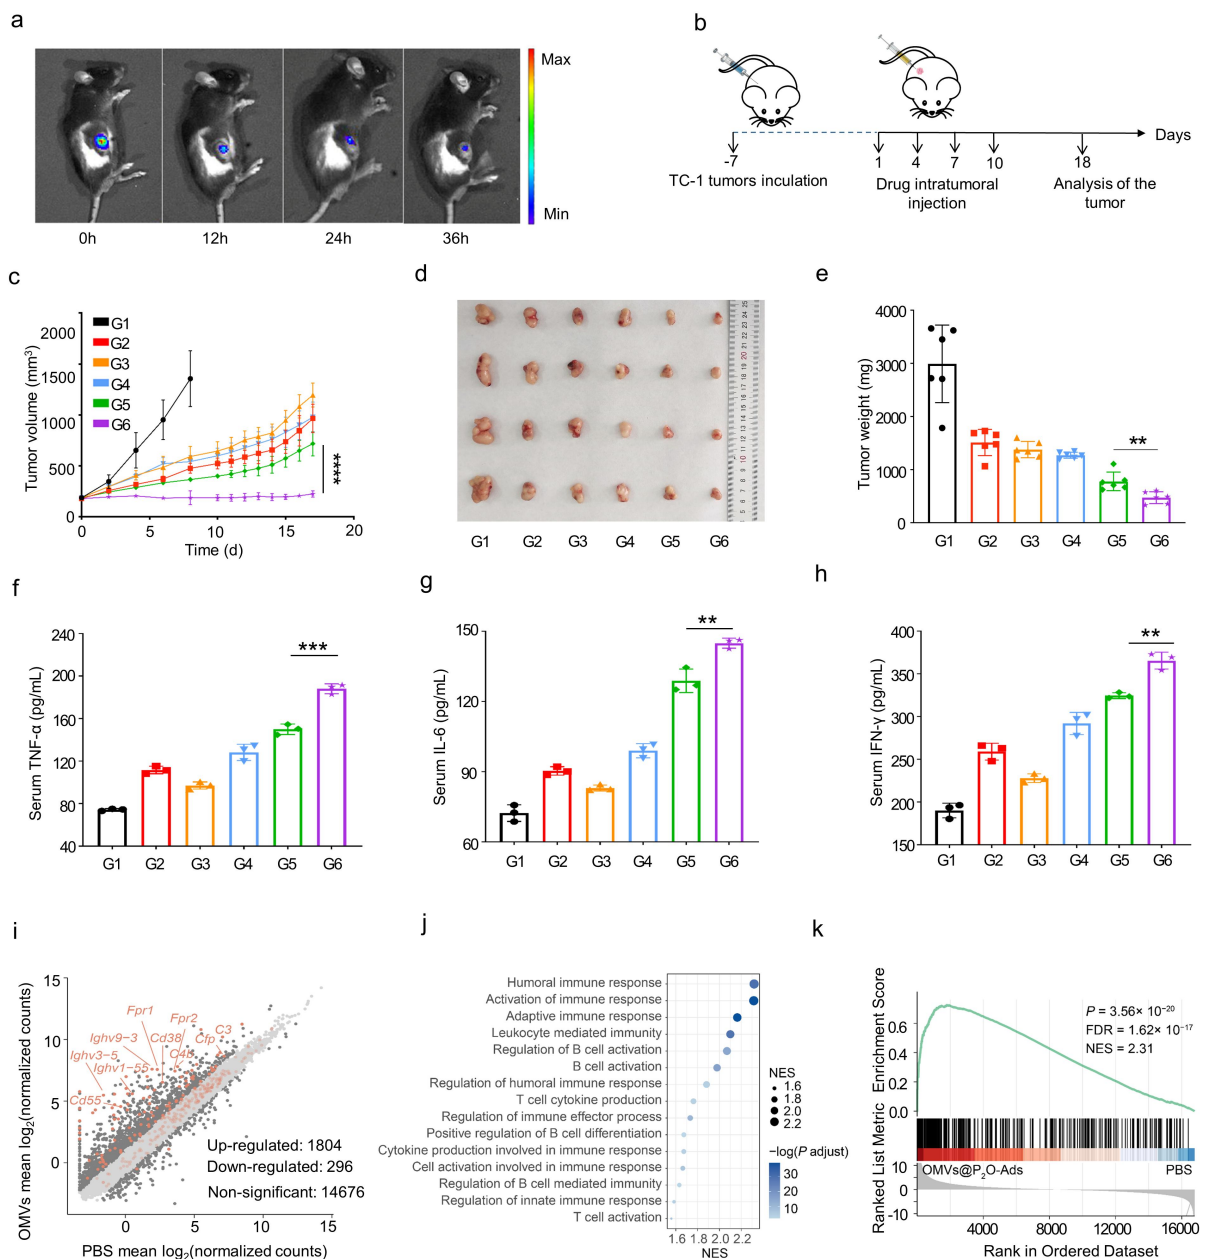



154 **Figure 3. *In vivo* oncolytic efficacy of the microbial nanocomposite.** (a) *In vivo* DIR fluorescent imaging of the  
155 microbial nanocomposite in TC-1-hCD46 xenograft tumor-bearing mice by IVIS. (b) Schematic illustration of the  
156 antitumor activity and immunology assessment experiments of the microbial nanocomposite using TC-1-hCD46  
157 xenograft tumor-bearing C57 female mice model. TC-1 cells ( $10^6$ ) were subcutaneously injected into the waist of  
158 female C57 mice, and the tumor-bearing mice were divided into six groups (n=6). When the tumor reached  
159 100-150 mm<sup>3</sup>, the mice were injected intratumorally with PBS, Ads ( $7 \times 10^5$  PFU), OMVs, OMVs@P<sub>2</sub>O,  
160 OMVs-Ads ( $7 \times 10^5$  PFU), and OMVs@P<sub>2</sub>O-Ads ( $7 \times 10^5$  PFU). The drug was given every three days for four  
161 consecutive times, the tumor volume was measured with a vernier caliper, and mice were weighed daily. (c)  
162 Tumor volume growth profiles of C57 mice bearing TC-1 xenografts. (d) Images of representative tumors of  
163 different treated groups on the 18<sup>th</sup> day (n=6). (e) Statistical graph of tumor weight of different treated groups  
164 on the 18<sup>th</sup> day (n=6). (f-h) Images of concentration of main cytokines in serum. (i) The differential gene expression  
165 between the samples treated with OMVs@P<sub>2</sub>O-Ads and PBS, using the absolute value of logFC greater than 1 as  
166 the threshold. (j) GSEA enriched pathways of the up-regulated genes in the samples treated with  
167 OMVs@P<sub>2</sub>O-Ads, showing immune-related terms. (k) Gene set enrichment analysis (GSEA) of the term  
168 “Activation of immune response”, and the genes included in this pathway are highlighted in (i) with light yellow  
169 brown. \* $p < 0.05$ , \*\* $p < 0.01$ , \*\*\* $p < 0.001$ , \*\*\*\* $p < 0.0001$  versus control. (G1: PBS, G2: Ads, G3: OMVs, G4:  
170 OMVs@P<sub>2</sub>O, G5: OMVs-Ads, G6: OMVs@P<sub>2</sub>O-Ads).

171 **Reviewer #2:** Ban and colleagues provide a report detailing the construction of biomineral  
172 engineered OMVs-encapsulating oncolytic adenovirus that exhibit enhanced antitumor efficacy. It  
173 was mainly dependent on overactivated autophagy. Some areas where improvements can be made  
174 include:

175 Major concerns:

176 **Question 1:** Fig 2f/4f: Grey-scale analysis should be performed, so that the LC3-II/LC3-I ratio can  
177 be calculated and statistically analyzed.

178 **Response:** We appreciate the reviewer's comments. The grey-scale analysis in Figure2f/4f had been  
179 conducted, and LC3-II/LC3-I ratio had been calculated and statistically analyzed in the revised  
180 manuscript.

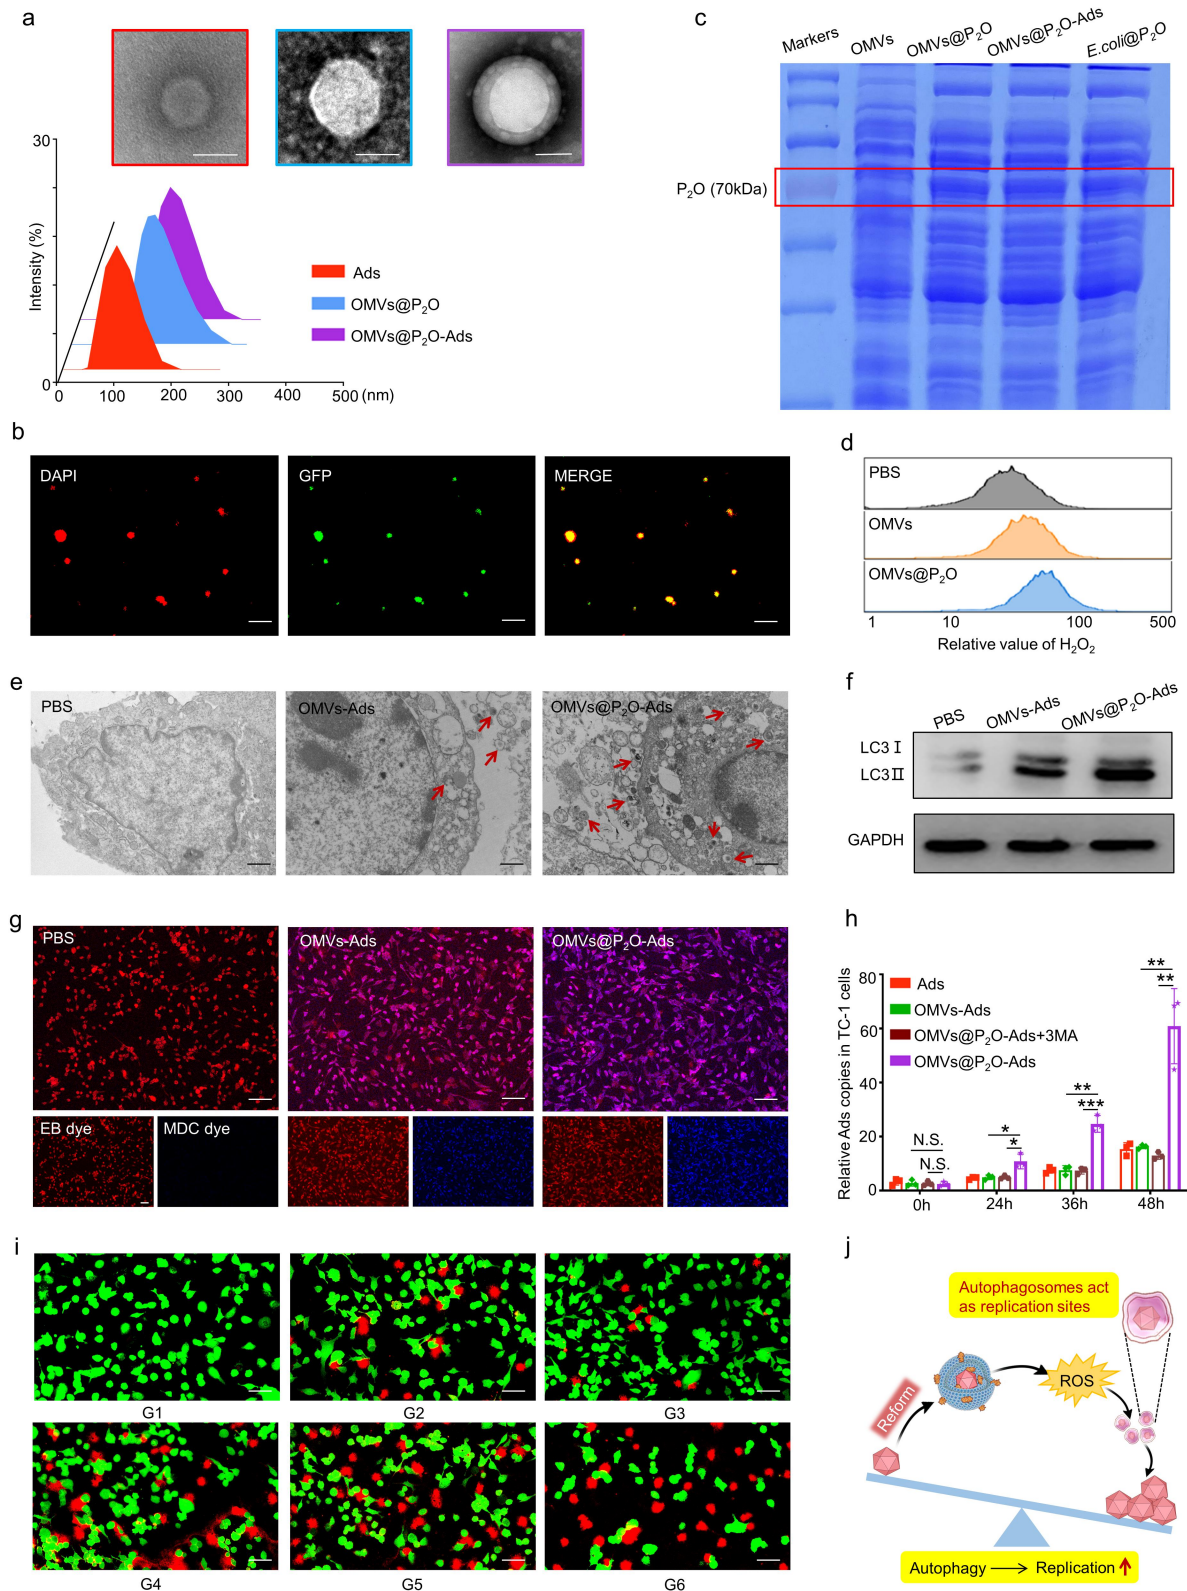

181 **Figure 2. Preparation and *in vitro* evaluation of the microbial nanocomposite.** (a) TEM and size distribution  
 182 images of Ads, OMVs@P<sub>2</sub>O, and OMVs@P<sub>2</sub>O-Ads. Scale bar=100 nm. (b) CLSM images of the microbial  
 183 nanocomposite. Ads were stained with DAPI dye (red) and OMVs carried a GFP marker (green). Scale bar=1  $\mu$ m.  
 184 (c) The expression of P<sub>2</sub>O was investigated by the SDS-PAGE method. (d) The ROS level assessment in TC-1

185 cells by flow cytometry. (e) TEM images of autophagosomes. Scale bar=200 nm. (f) The expression of  
186 autophagy-related protein LC3-I and LC3-II by western bolt analyses. (g) CLSM images of autophagosomes.  
187 Cells were stained with EB dye (red) and autophagosomes were stained with MDC dye (blue). Scale bar=50  $\mu$ m.  
188 (h) The Ads replication in TC-1 cells was quantified using real-time PCR at 0, 24, 36, and 48 h sequentially. 3MA  
189 is an autophagy inhibitor: 3-Methyladenine. (i) Cytotoxicity of different formulations in TC-1 cells by CLSM.  
190 Living cells were stained with Calcein (green) and dead cells were stained with PI (red). Scale bar=20  $\mu$ m. (j)  
191 Schematic diagram of bridging ROS with oncolytic Ads replication. \* $p$ <0.05, \*\* $p$ <0.01, \*\*\* $p$ <0.001,  
192 \*\*\*\* $p$ <0.0001 versus control. G1: PBS, G2: Ads, G3: OMVs, G4: OMVs@P<sub>2</sub>O, G5: OMVs-Ads, G6:  
193 OMVs@P<sub>2</sub>O-Ads.

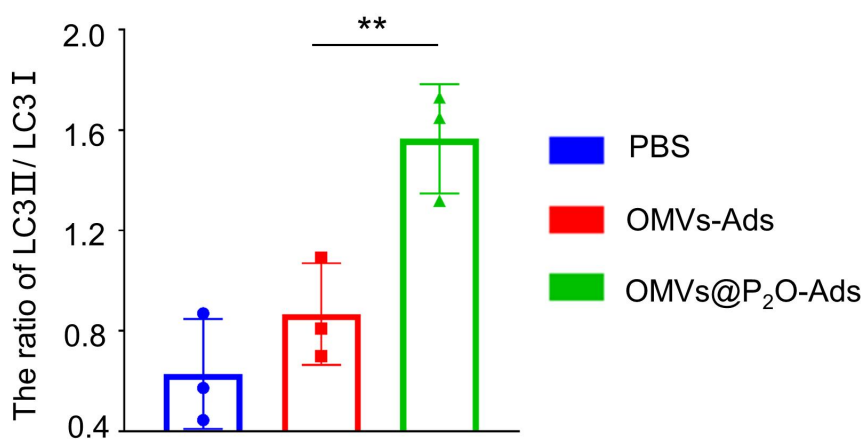

194

**Figure S8.** The LC3-II/LC3-I ratio *in vitro* (n=3).

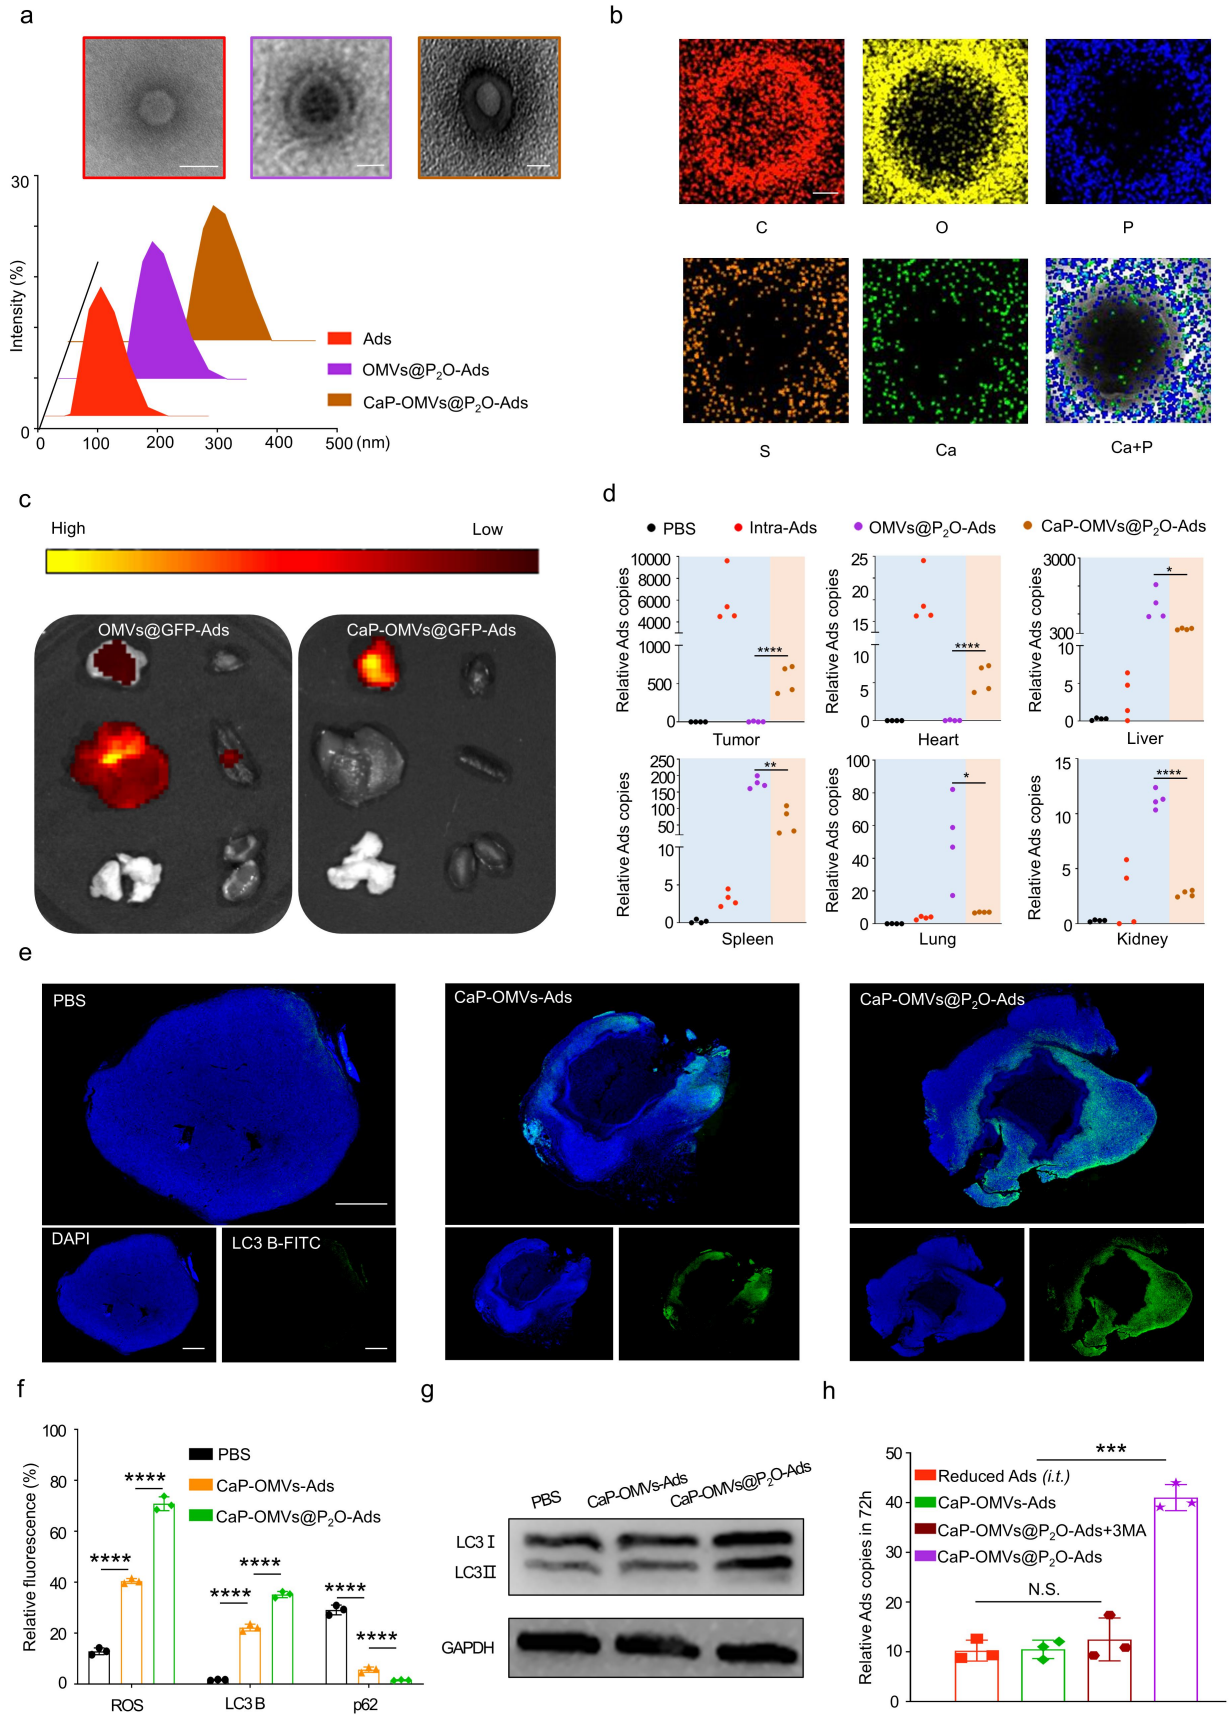

195 **Figure 4. Preparation and *in vivo* evaluation of the biom mineralized microbial nanocomposite.** (a) TEM and  
 196 size distribution images of Ads, OMVs@P<sub>2</sub>O-Ads, and CaP-OMVs@P<sub>2</sub>O-Ads. Scale bar=100 nm. (b) Energy

197 spectrum analysis image of the biom mineralized composite microbe. Scale bar=50 nm. (c) *In vivo* fluorescence  
 198 imaging of the multiple organs and tumors collected from the mice at 24 h post *i.v.* injection. From left to right:  
 199 tumor, heart, liver, spleen, lung, and kidney. (d) Quantitation of the biodistribution of relative Ads contents in  
 200 multiple organs and tumors after 24 h of different treatments by RT-qPCR (n=4). (e) Immunofluorescence images  
 201 of LC3 autophagic proteins in tumor tissues. Blue represents DAPI-stained tumor cells and the green represents  
 202 FITC-stained LC3 autophagic protein. Scale bar=2 mm. (f) Quantitative analysis of fluorescence intensity. (g) The  
 203 expression of autophagy-related protein LC3-I and LC3-II examined by western blot. (h) Quantitation of relative  
 204 Ads content in the tumor after 72 h of different treatments by RT-qPCR technique (n=3). \* $p < 0.05$ , \*\* $p < 0.01$ ,  
 205 \*\*\* $p < 0.001$ , \*\*\*\* $p < 0.0001$  versus control. \* $p < 0.05$ , \*\* $p < 0.01$ , \*\*\* $p < 0.001$ , \*\*\*\* $p < 0.0001$  versus control.

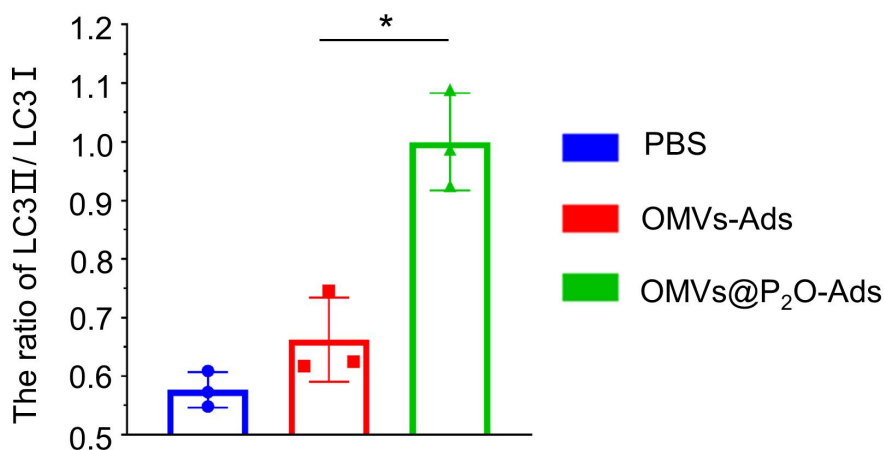

206 **Figure18.** The LC3-II/LC3-I ratio *in vivo* (n=3).

207 **Question 2:** Fig 3f-k: Since immune response is a dynamic process, from innate immunity to T cell  
 208 mediated immunity and B cell mediated immunity, so it is critical to specify at what time point did  
 209 they collect the tumor samples and explain why they choose this time point.

210 **Response:** We appreciate the reviewer's comments. As for Figure 3f-h, the collection of samples  
 211 for immunological studies was performed on the basis of pharmacodynamic studies. Concretely, as  
 212 shown in Figure 3b, the mice were injected different drugs at 1, 4, 7 and 10 days and dissected at  
 213 the 18th day. And as for Figure 3i-k, the collection of samples for transcriptomic analysis of the  
 214 tumor xenografts 7 days after the first administration. Compared with the expression of cytokines  
 215 and the visualization of tumor volume, relevant transcriptomic change of the tumor xenografts is  
 216 earlier, this is why we accomplished the transcriptomic analysis of the tumor xenografts after two  
 217 consecutive administration (on the seventh day). However, as described by the reviewer's

218 **Question2 - Question5,** we have been aware that the collection of samples for transcriptomic  
 219 analysis of the tumor xenografts at 7 day is too early. In the revised manuscript, we redesigned the

220 experiment and collected samples for transcriptomic analysis on the twelfth day after the fourth  
 221 administration. And the relevant results are shown in Figure 3i-k.

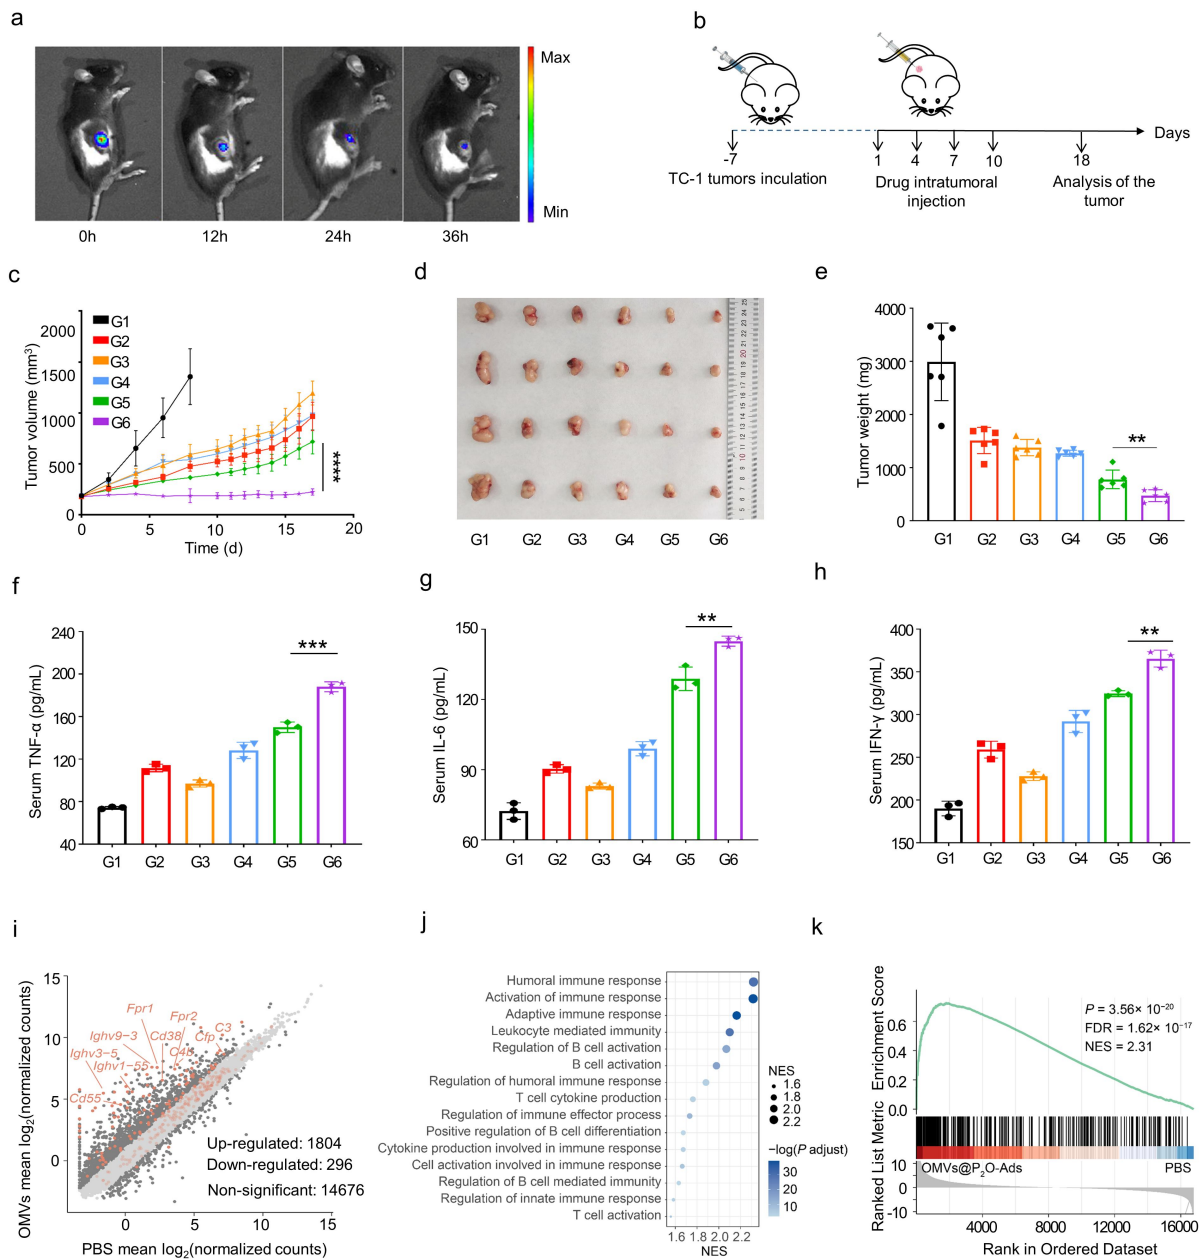

222 **Figure 3. *In vivo* oncolytic efficacy of the microbial nanocomposite.** (a) *In vivo* DIR fluorescent imaging of the  
 223 microbial nanocomposite in TC-1-hCD46 xenograft tumor-bearing mice by IVIS. (b) Schematic illustration of the  
 224 antitumor activity and immunology assessment experiments of the microbial nanocomposite using TC-1-hCD46  
 225 xenograft tumor-bearing C57 female mice model. TC-1 cells (10<sup>6</sup>) were subcutaneously injected into the waist of  
 226 female C57 mice, and the tumor-bearing mice were divided into six groups (n=6). When the tumor reached  
 227 100-150 mm<sup>3</sup>, the mice were injected intratumorally with PBS, Ads (7×10<sup>5</sup> PFU), OMVs, OMVs@P<sub>2</sub>O,  
 228 OMVs-Ads (7×10<sup>5</sup> PFU), and OMVs@P<sub>2</sub>O-Ads (7×10<sup>5</sup> PFU). The drug was given every three days for four  
 229 consecutive times, the tumor volume was measured with a vernier caliper, and mice were weighed daily. (c)  
 230 Tumor volume growth profiles of C57 mice bearing TC-1 xenografts. (d) Images of representative tumors of

231 different treated groups on the 18<sup>th</sup> day (n=6). (e) Statistical graph of tumor weight of different treated groups on  
232 the 18<sup>th</sup> day (n=6). (f-h) Images of concentration of main cytokines in serum. (i) The differential gene expression  
233 between the samples treated with OMVs@P<sub>2</sub>O-Ads and PBS, using the absolute value of logFC greater than 1 as  
234 the threshold. (j) GSEA enriched pathways of the up-regulated genes in the samples treated with  
235 OMVs@P<sub>2</sub>O-Ads, showing immune-related terms. (k) Gene set enrichment analysis (GSEA) of the term  
236 “Activation of immune response”, and the genes included in this pathway are highlighted in (i) with light yellow  
237 brown. \* $p < 0.05$ , \*\* $p < 0.01$ , \*\*\* $p < 0.001$ , \*\*\*\* $p < 0.0001$  versus control. (G1: PBS, G2: Ads, G3: OMVs, G4:  
238 OMVs@P<sub>2</sub>O, G5: OMVs-Ads, G6: OMVs@P<sub>2</sub>O-Ads).

239 **Question 3:** Fig 3j: Grouping information and FDR should also be presented in the GSEA figure.  
240 Unexpectedly, the pathway “Activation of immune response” is not included in Fig S11. The  
241 authors should explain the representativeness of choosing this pathway.

242 **Response:** Thanks for this kind suggestion, and grouping information and FDR had been added in  
243 the GSEA figure (Fig. 3k) in the revised manuscript. The original Fig S11 was ranked by the P  
244 value and also limited terms were shown, thus the pathway “Activation of immune response” was  
245 not included. In the revised manuscript, we improved the time-point to acquire the samples and  
246 re-performed the transcriptomic analysis and showed that the pathway “Activation of immune  
247 response” is significantly up-regulated 12 days after OMVs@P<sub>2</sub>O-Ads injection (Fig 3j).



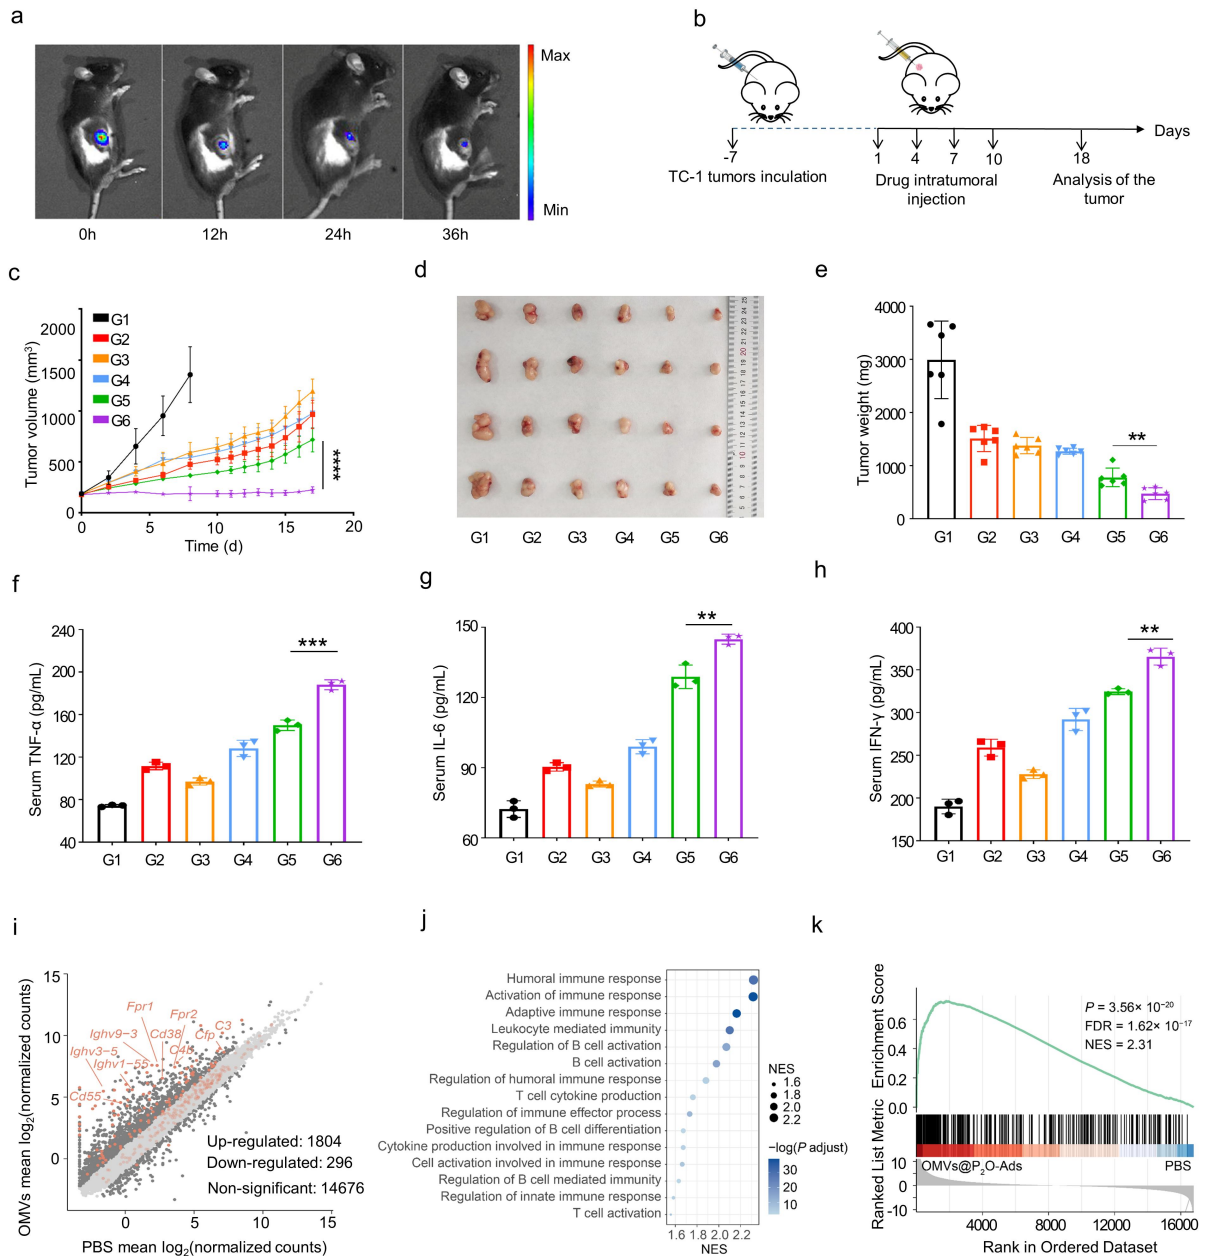

248 **Figure 3. *In vivo* oncolytic efficacy of the microbial nanocomposite.** (a) *In vivo* DIR fluorescent imaging of the  
 249 microbial nanocomposite in TC-1-hCD46 xenograft tumor-bearing mice by IVIS. (b) Schematic illustration of the  
 250 antitumor activity and immunology assessment experiments of the microbial nanocomposite using TC-1-hCD46  
 251 xenograft tumor-bearing C57 female mice model. TC-1 cells ( $10^6$ ) were subcutaneously injected into the waist of  
 252 female C57 mice, and the tumor-bearing mice were divided into six groups ( $n=6$ ). When the tumor reached  
 253 100-150  $\text{mm}^3$ , the mice were injected intratumorally with PBS, Ads ( $7 \times 10^5$  PFU), OMVs, OMVs@P<sub>2</sub>O,  
 254 OMVs-Ads ( $7 \times 10^5$  PFU), and OMVs@P<sub>2</sub>O-Ads ( $7 \times 10^5$  PFU). The drug was given every three days for four  
 255 consecutive times, the tumor volume was measured with a vernier caliper, and mice were weighed daily. (c)  
 256 Tumor volume growth profiles of C57 mice bearing TC-1 xenografts. (d) Images of representative tumors of  
 257 different treated groups on the 18<sup>th</sup> day ( $n=6$ ). (e) Statistical graph of tumor weight of different treated groups  
 258 on the 18<sup>th</sup> day ( $n=6$ ). (f-h) Images of concentration of main cytokines in serum. (i) **The differential gene expression**  
 259 **between the samples treated with OMVs@P<sub>2</sub>O-Ads and PBS, using the absolute value of logFC greater than 1 as**

260 the threshold. (j) GSEA enriched pathways of the up-regulated genes in the samples treated with  
261 OMVs@P<sub>2</sub>O-Ads, showing immune-related terms. (k) Gene set enrichment analysis (GSEA) of the term  
262 “Activation of immune response”, and the genes included in this pathway are highlighted in (i) with light yellow  
263 brown. \* $p < 0.05$ , \*\* $p < 0.01$ , \*\*\* $p < 0.001$ , \*\*\*\* $p < 0.0001$  versus control. (G1: PBS, G2: Ads, G3: OMVs, G4:  
264 OMVs@P<sub>2</sub>O, G5: OMVs-Ads, G6: OMVs@P<sub>2</sub>O-Ads).

265 **Question 4:** Fig 3k: The individual variations among the three tested samples in OMVs@P<sub>2</sub>O-Ads  
266 group are much too large. This kind of variation severely compromise the accuracy of the data.

267 **Response:** Thanks for this kind suggestion. In our original experiment, the samples were acquired  
268 earlier (on the seventh day), so that the immune response in some mice had not been invoked.  
269 According to the reviewer’s suggestion and the result of our phenotypic experiment, samples were  
270 acquired uniformly 11 days after OMVs@P<sub>2</sub>O-Ads injection. And the experimental results obtained  
271 according to the modified experimental plan are shown in the Figure 3i-k in the revised manuscript.



272 **Figure 3. *In vivo* oncolytic efficacy of the microbial nanocomposite.** (a) *In vivo* DIR fluorescent imaging of the  
 273 microbial nanocomposite in TC-1-hCD46 xenograft tumor-bearing mice by IVIS. (b) Schematic illustration of the  
 274 antitumor activity and immunology assessment experiments of the microbial nanocomposite using TC-1-hCD46  
 275 xenograft tumor-bearing C57 female mice model. TC-1 cells ( $10^6$ ) were subcutaneously injected into the waist of  
 276 female C57 mice, and the tumor-bearing mice were divided into six groups ( $n=6$ ). When the tumor reached  
 277 100-150  $\text{mm}^3$ , the mice were injected intratumorally with PBS, Ads ( $7 \times 10^5$  PFU), OMVs, OMVs@P<sub>2</sub>O,  
 278 OMVs-Ads ( $7 \times 10^5$  PFU), and OMVs@P<sub>2</sub>O-Ads ( $7 \times 10^5$  PFU). The drug was given every three days for four  
 279 consecutive times, the tumor volume was measured with a vernier caliper, and mice were weighed daily. (c)  
 280 Tumor volume growth profiles of C57 mice bearing TC-1 xenografts. (d) Images of representative tumors of  
 281 different treated groups on the 18<sup>th</sup> day ( $n=6$ ). (e) Statistical graph of tumor weight of different treated groups  
 282 on the 18<sup>th</sup> day ( $n=6$ ). (f-h) Images of concentration of main cytokines in serum. (i) **The differential gene expression**  
 283 **between the samples treated with OMVs@P<sub>2</sub>O-Ads and PBS, using the absolute value of logFC greater than 1 as**

284 the threshold. (j) GSEA enriched pathways of the up-regulated genes in the samples treated with  
285 OMVs@P<sub>2</sub>O-Ads, showing immune-related terms. (k) Gene set enrichment analysis (GSEA) of the term  
286 “Activation of immune response”, and the genes included in this pathway are highlighted in (i) with light yellow  
287 brown. \* $p < 0.05$ , \*\* $p < 0.01$ , \*\*\* $p < 0.001$ , \*\*\*\* $p < 0.0001$  versus control. (G1: PBS, G2: Ads, G3: OMVs, G4:  
288 OMVs@P<sub>2</sub>O, G5: OMVs-Ads, G6: OMVs@P<sub>2</sub>O-Ads).

289 **Question 5:** Fig S11: Most of the GSEA enriched pathways are related to B cells, suggesting that  
290 the immune response induced by OMVs@P<sub>2</sub>O-Ads seems to be mediated by B cells, but not T cells.  
291 As far as we know, antitumor immunity is mostly mediated by T cells. Thus, it would be better for  
292 the authors to explain why they did not study B cell mediated immunity. Perhaps 18 days post Ads  
293 inoculation is too late to monitor the T cell immunity.

294 **Response:** Thanks for this kind suggestion. Looking at the latest research progress of  
295 microbe-mediated tumor immunotherapy, although the role of B cells in anti-tumor immunity is  
296 gradually being discovered, as mentioned by the reviewer, anti-tumor immunity is mainly mediated  
297 by T cells<sup>1, 2, 3</sup>. In the experimental results of mice tumor transcriptome analysis shown in the  
298 revised Figure 3j, most of the GSEA enriched pathways are related to B cells, which is consistent  
299 with the results of other experiments (such as the increase of serum IL-6 in Fig 3g, which is capable  
300 of promoting the differentiation of B cell) and is foreseen. Based on the experimental data of this  
301 project and related literature reports, we believe that the activation of the B cell-associated  
302 transcriptome is mainly caused by antiviral immunity instead of anti-tumor immunity. Although the  
303 amplified anti-tumor immunity after injection of OMVs@P<sub>2</sub>O-Ads is what we expect, as was  
304 reviewed in our previous work, the occurrence of antiviral immunity was earlier and stronger than  
305 anti-tumor immunity and the number of virus particles free in the tumor microenvironment is much  
306 more than the number of viruses infected into the tumor cells during the whole immunity process<sup>4</sup>.  
307 In the initial stage, free virions are mainly engulfed and eliminated by macrophages. After the  
308 activation of specific antiviral immunity, B cell-mediated humoral immunity is mainly responsible  
309 for the elimination of free Ads in tumor fluids. Overall, compared with innate immune cells and  
310 specific antiviral T cells, B cells play a more significant role during the process of virus clearance,  
311 which is the main reason why B cell-associated transcriptomes was distinctly activated as is shown  
312 in the revised Figure 3j (the Fig S11 was removed to Figure 3j). However, in this study, we  
313 attempted to focus on the anti-tumor immune response triggered by OMVs@P<sub>2</sub>O-Ads instead of

314 antiviral immunity. Therefore, there is no doubt that it's more significant for us to meticulously  
315 investigate the role of T cells in anti-tumor immunity process in our manuscripts even though most  
316 GSEA-enriched pathways are associated with B cells. In addition, we agree with the reviewer's  
317 opinion that perhaps 18 days post Ads inoculation is too late. In the revised manuscript, we have  
318 re-modified the experiment and the transcriptome analysis of tumor tissues was performed on day  
319 11, and the new results had been presented in Figure 3i-k in the revised manuscript. As shown in  
320 Figure 3i-k, although some GSEA-enriched pathways were associated with B cells,  
321 T-cell-associated GSEA-enriched pathways were also detected, indicating that the earlier detection  
322 time points (on day 11 after the first administration) was more proper to investigate the change  
323 situation of transcriptome in tumor tissue of mice, and the microbial nanocomposite  
324 OMVs@P<sub>2</sub>O-Ads possessed the ability to invoke T cell-mediated antitumor immunity.

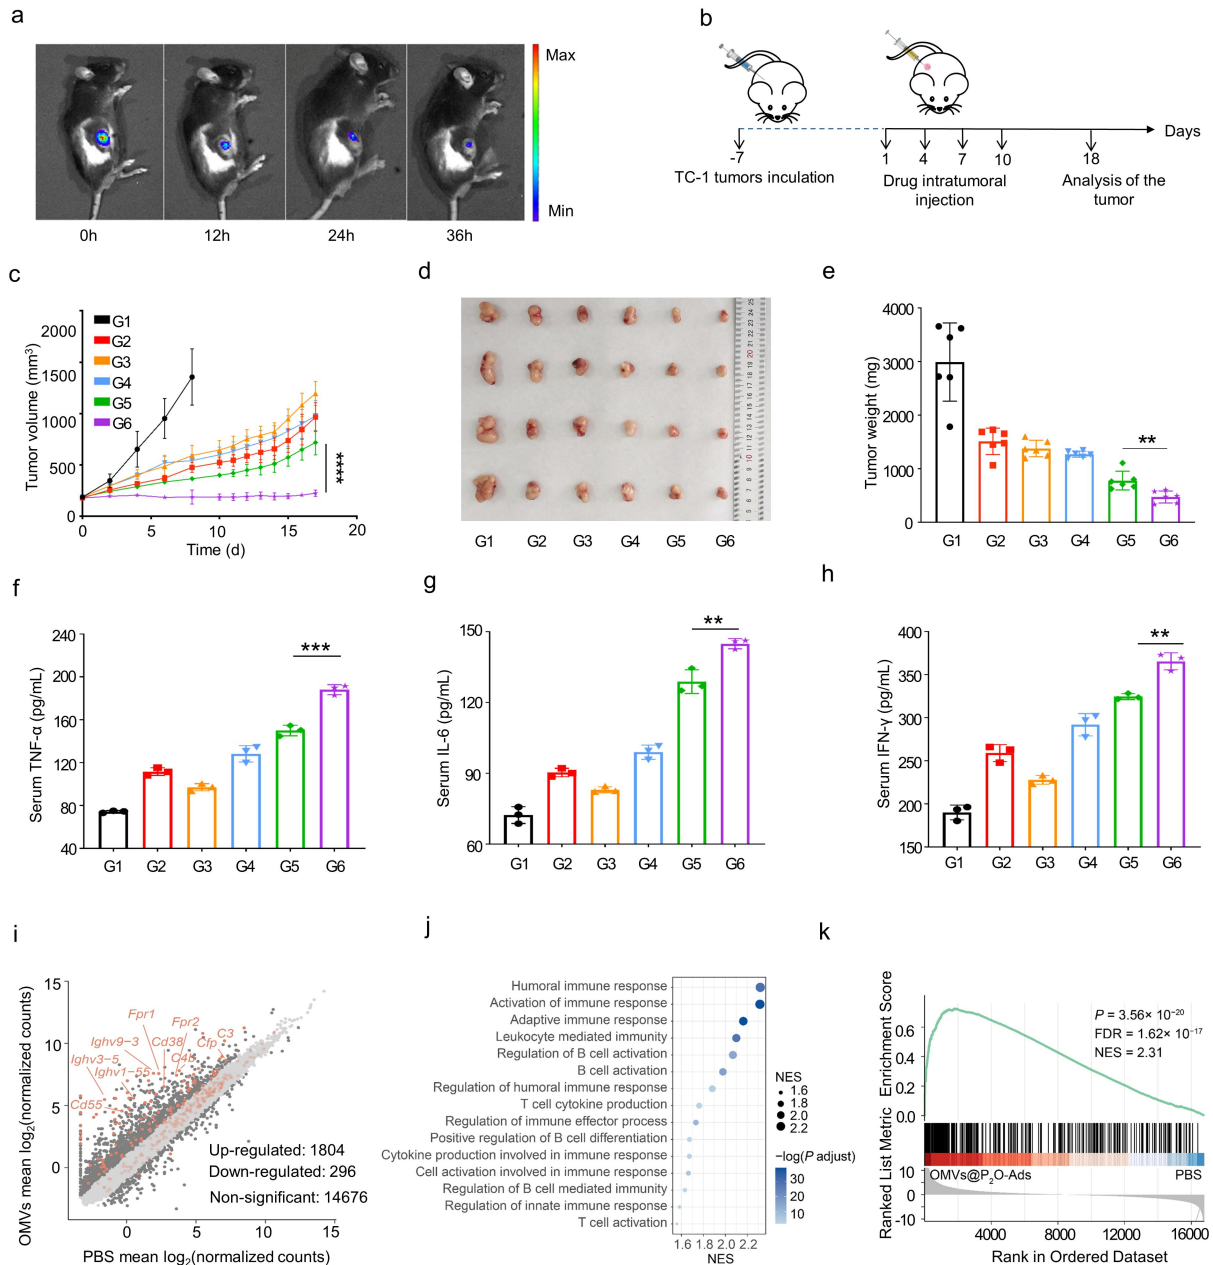

325 **Figure 3. *In vivo* oncolytic efficacy of the microbial nanocomposite.** (a) *In vivo* DIR fluorescent imaging of the  
326 microbial nanocomposite in TC-1-hCD46 xenograft tumor-bearing mice by IVIS. (b) Schematic illustration of the  
327 antitumor activity and immunology assessment experiments of the microbial nanocomposite using TC-1-hCD46  
328 xenograft tumor-bearing C57 female mice model. TC-1 cells ( $10^6$ ) were subcutaneously injected into the waist of  
329 female C57 mice, and the tumor-bearing mice were divided into six groups ( $n=6$ ). When the tumor reached  
330 100-150  $\text{mm}^3$ , the mice were injected intratumorally with PBS, Ads ( $7 \times 10^5$  PFU), OMVs, OMVs@P<sub>2</sub>O,  
331 OMVs-Ads ( $7 \times 10^5$  PFU), and OMVs@P<sub>2</sub>O-Ads ( $7 \times 10^5$  PFU). The drug was given every three days for four  
332 consecutive times, the tumor volume was measured with a vernier caliper, and mice were weighed daily. (c)  
333 Tumor volume growth profiles of C57 mice bearing TC-1 xenografts. (d) Images of representative tumors of  
334 different treated groups on the 18<sup>th</sup> day ( $n=6$ ). (e) Statistical graph of tumor weight of different treated groups  
335 on the 18<sup>th</sup> day ( $n=6$ ). (f-h) Images of concentration of main cytokines in serum. (i) **The differential gene expression**  
336 **between the samples treated with OMVs@P<sub>2</sub>O-Ads and PBS, using the absolute value of logFC greater than 1 as**

337 the threshold. (j) GSEA enriched pathways of the up-regulated genes in the samples treated with  
338 OMVs@P<sub>2</sub>O-Ads, showing immune-related terms. (k) Gene set enrichment analysis (GSEA) of the term  
339 “Activation of immune response”, and the genes included in this pathway are highlighted in (i) with light yellow  
340 brown. \* $p < 0.05$ , \*\* $p < 0.01$ , \*\*\* $p < 0.001$ , \*\*\*\* $p < 0.0001$  versus control. (G1: PBS, G2: Ads, G3: OMVs, G4:  
341 OMVs@P<sub>2</sub>O, G5: OMVs-Ads, G6: OMVs@P<sub>2</sub>O-Ads).

## 342 **References**

- 343 1. Cabrita R, et al. Tertiary lymphoid structures improve immunotherapy and survival in  
344 melanoma. *Nature* 577, 561-565 (2020).
- 345 2. Petitprez F, et al. B cells are associated with survival and immunotherapy response in sarcoma.  
346 *Nature* 577, 556-560 (2020).
- 347 3. Helmink BA, et al. B cells and tertiary lymphoid structures promote immunotherapy response.  
348 *Nature* 577, 549-555 (2020).
- 349 4. Ban W, et al. Emerging systemic delivery strategies of oncolytic viruses: A key step toward  
350 cancer immunotherapy. *Nano Res* 15, 4137-4153 (2022).

351 **Question 6:** Fig S13/S14 are extremely important and should be presented in Fig 4. What kind of  
352 fluorescent dye did the authors used in Fig S13? This information should be provided in figure  
353 legends.

354 **Response:** We appreciate the reviewer’s comments. In the revised manuscript, we have presented  
355 Fig S13/S14 in Figure 4a and 4b. In Fig S13 (Figure 4a in the revised manuscript), we used  
356 engineered eubacterial outer membrane vesicles that can express green fluorescent protein  
357 (OMVs@GFP).



358 **Figure 4. Preparation and *in vivo* evaluation of the biom mineralized microbial nanocomposite.** (a) TEM and  
 359 size distribution images of Ads, OMVs@P<sub>2</sub>O-Ads, and CaP-OMVs@P<sub>2</sub>O-Ads. Scale bar=100 nm. (b) Energy



360 spectrum analysis image of the biomineralized composite microbe. Scale bar=50 nm. (c) *In vivo* fluorescence  
361 imaging of the multiple organs and tumors collected from the mice at 24 h post *i.v.* injection. From left to right:  
362 tumor, heart, liver, spleen, lung, and kidney. (d) Quantitation of the biodistribution of relative Ads contents in  
363 multiple organs and tumors after 24 h of different treatments by RT-qPCR (n=4). (e) Immunofluorescence images  
364 of LC3 autophagic proteins in tumor tissues. Blue represents DAPI-stained tumor cells and the green represents  
365 FITC-stained LC3 autophagic protein. Scale bar=2 mm. (f) Quantitative analysis of fluorescence intensity. (g) The  
366 expression of autophagy-related protein LC3-I and LC3-II examined by western blot. (h) Quantitation of relative  
367 Ads content in the tumor after 72 h of different treatments by RT-qPCR technique (n=3). \* $p<0.05$ , \*\* $p<0.01$ ,  
368 \*\*\* $p<0.001$ , \*\*\*\* $p<0.0001$  versus control. \* $p<0.05$ , \*\* $p<0.01$ , \*\*\* $p<0.001$ , \*\*\*\* $p<0.0001$  versus control.

369 **Question 7:** Fig 5c: Large amount of tiny green spots, which are unlikely to be normal CD8  
370 staining, are shown in G5 and G6. The authors would be better to provide explanation.

371 **Response:** We appreciate the reviewer's comments. In original Figure 5c, the tiny green spots  
372 indeed were CD8 staining, but the image quality was not satisfactory. In revised manuscript, we  
373 modified the CD8 immunofluorescence section experiments using confocal fluorescence  
374 microscopy, and the representative images and the fluorescence quantitative statistics are shown as  
375 follows:

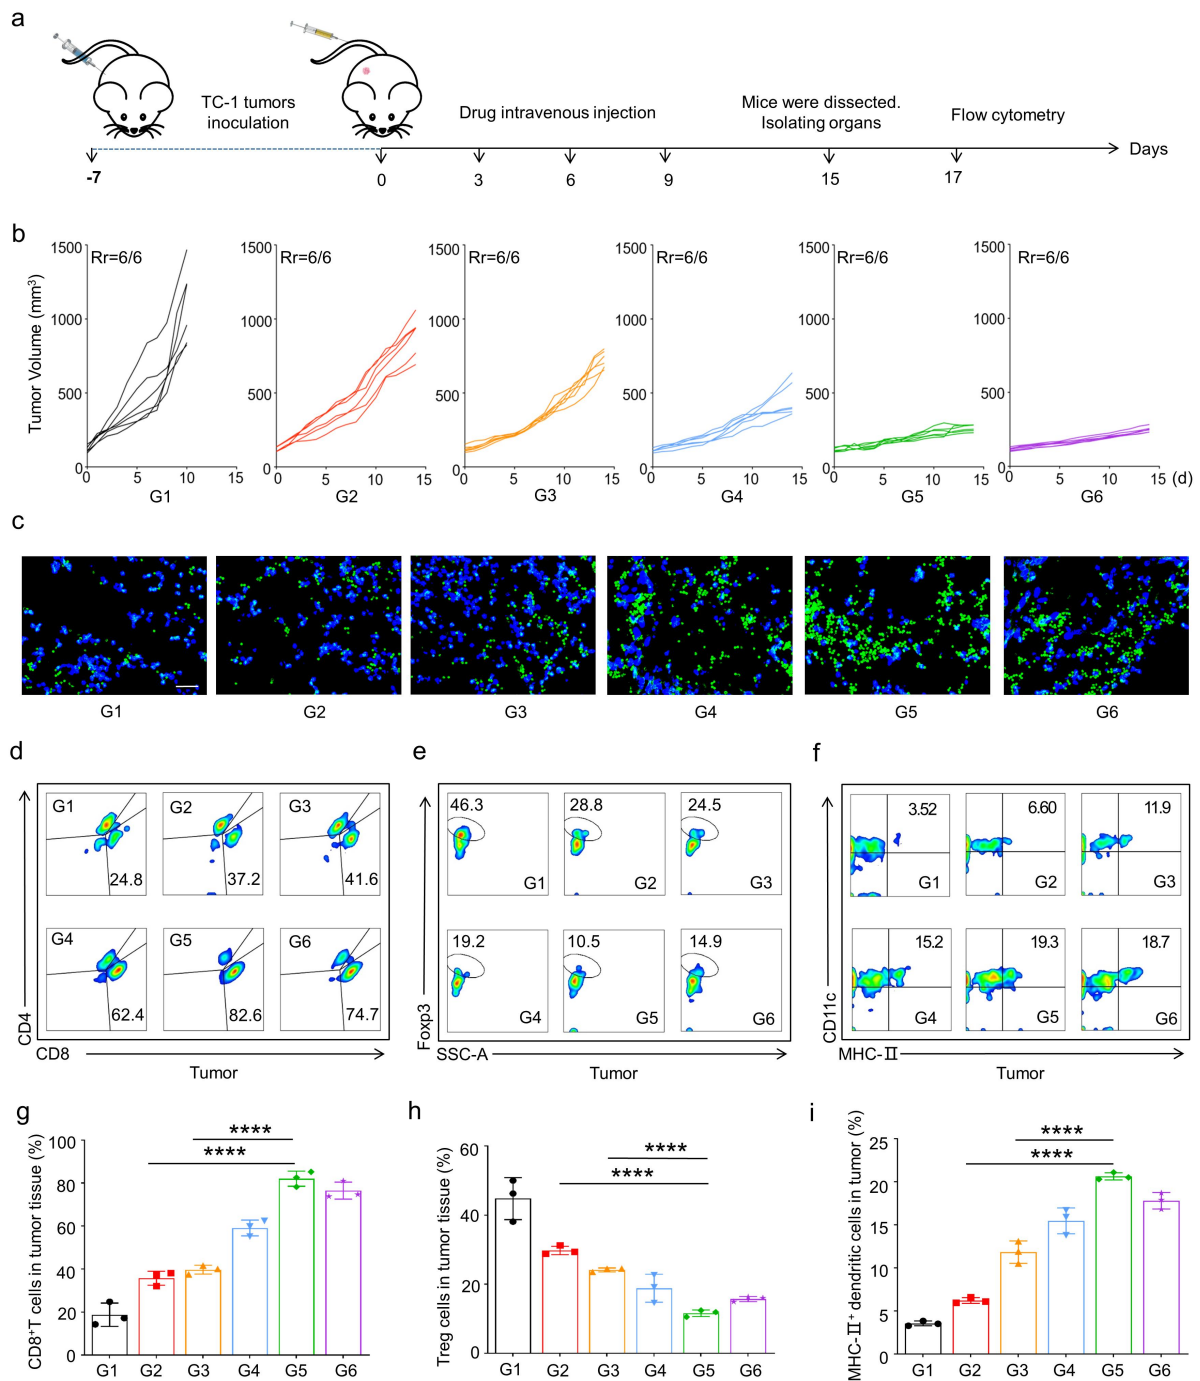

376 **Figure 5. *In vivo* oncolytic efficacy and immuneactivation capacity of the biomaterialized microbial**  
 377 **nanocomposite.** (a) Schematic illustration of the antitumor activity and immunity investigation of the  
 378 biomaterialized microbial nanocomposite on TC-1-hCD46 xenograft tumor-bearing C57 female mice model. (b)  
 379 Individual tumor growth kinetics in different groups (n=6). (c) The immunofluorescence images of CD8<sup>+</sup> T cells  
 380 in tumor tissues. Scale bars=50 $\mu\text{m}$ . (d) Representative flow cytometric evolution images (g) as well as relative  
 381 quantification of CD8<sup>+</sup> T cells (CD45<sup>+</sup>CD3<sup>+</sup>CD8<sup>+</sup>) in the tumor (n=3). (e) Representative flow cytometric  
 382 evolution images (h) as well as relative quantification of Treg cells (CD45<sup>+</sup>CD3<sup>+</sup>CD4<sup>+</sup>Fopx3<sup>+</sup>) in the tumor (n=3).  
 383 (f) Representative flow cytometric evolution images (i) and relative quantification of MHC-II<sup>+</sup> DC cells  
 384 (CD45<sup>+</sup>CD11c<sup>+</sup>MHC-II<sup>+</sup>) in the tumor (n=3). \* $p < 0.05$ , \*\* $p < 0.01$ , \*\*\* $p < 0.001$ , \*\*\*\* $p < 0.0001$  versus control. (G1:

385 PBS, G2: OMVs@P<sub>2</sub>O-Ads, G3: CaP-OMVs-Ads, G4: Intra-Ads, G5: CaP-OMVs@P<sub>2</sub>O-Ads, G6: Intra-Ads high  
386 does).

387 **Question 8:** Fig 5: The authors try to demonstrate that the antitumor efficacy of  
388 CaP-OMVs@P<sub>2</sub>O-Ads depend on the activation of CD8 T cells. In this case, more solid evidences,  
389 including the activation status of CD8 T cells (CD44 and CD69 expression), the tumor killing  
390 activity of CD8 T cells (co-culture assay), and dependency of CD8 T cells (depleting CD8 with  
391 antibodies), should be provided.

392 **Response:** We appreciate the reviewer's comments. To refine the content of our experiments, we  
393 supplemented the relevant experiments one by one as suggested by reviewer. First, we measured the  
394 proportion of CD45<sup>+</sup>CD3<sup>+</sup>CD8<sup>+</sup>CD44<sup>+</sup> and CD45<sup>+</sup>CD3<sup>+</sup>CD8<sup>+</sup>CD69<sup>+</sup> T cells in tumor tissue after  
395 four consecutive treatment of Cap-OMVs@P<sub>2</sub>O-Ads *via* flow cytometry. As is shown in the Figure,  
396 CD44<sup>-</sup> T cells and CD44<sup>+</sup> T cells clusters could be obviously observed. However, the cell cluster of  
397 CD69<sup>+</sup> T cells cannot be found in the figure, indicating that there is few T cell expressing CD69<sup>+</sup>  
398 after four consecutive treatments of Cap-OMVs@P<sub>2</sub>O-Ads. By reviewing the related papers, the  
399 rationality of our experimental results was confirmed. Concretely, CD69 is one of the earliest  
400 markers upregulated after T cell activation, whose expression increased in a time-dependent manner  
401 between 3 and 12 hours, remained elevated until 24 hours, and then decreased<sup>1</sup>. In our study, the  
402 CD45<sup>+</sup>CD3<sup>+</sup>CD8<sup>+</sup>CD69<sup>+</sup> T cells were measured after four consecutive treatment of  
403 Cap-OMVs@P<sub>2</sub>O-Ads. Therefore, we held the opinion that the T cells go through the primary  
404 CD69<sup>+</sup> activation phase and enter into the next activation stage.

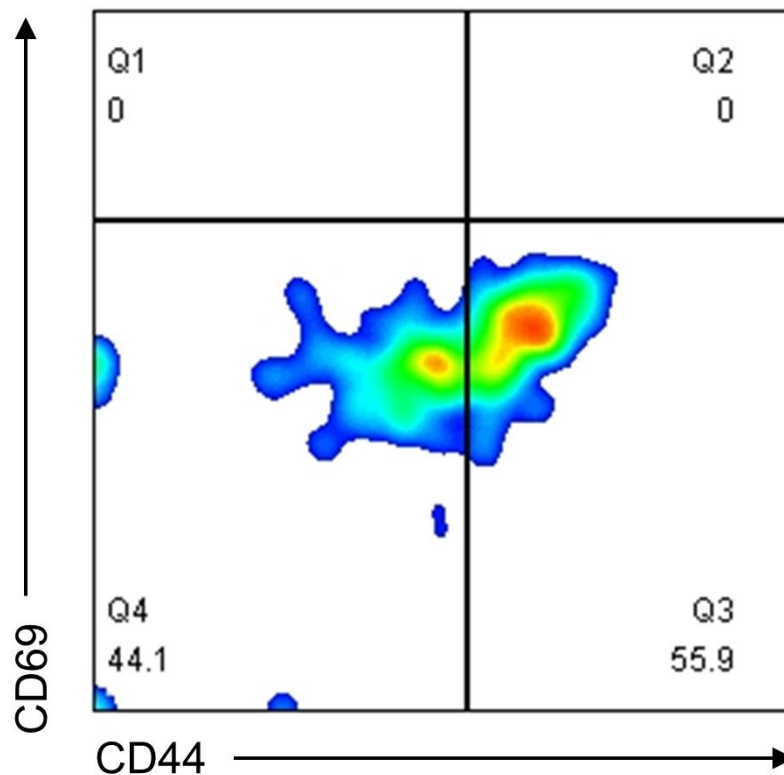

405 **Figure.** Representative flow cytometric evolution image of CD45<sup>+</sup>CD3<sup>+</sup>CD8<sup>+</sup>CD44<sup>+</sup> T cells and  
 406 CD45<sup>+</sup>CD3<sup>+</sup>CD8<sup>+</sup>CD69<sup>+</sup> T cells in tumor tissue.

407 Next, we have accomplished the co-culture assay *in vitro* to verify the tumor killing activity of  
 408 CD8<sup>+</sup> T cells in different administration groups. The detailed experimental method ([section 4.23](#))  
 409 and the experimental result ([Figure S32](#)) are as follows:

410 Method: “First, TC-1 cells (10<sup>6</sup>) were subcutaneously injected into the waist of female C57 mice,  
 411 and tumor-bearing mice were divided into six groups (n=6). When the tumor reached 100–150 mm<sup>3</sup>,  
 412 the mice were intravenously injected with PBS, OMVs@P<sub>2</sub>O-Ads, CaP-OMVs-Ads, and  
 413 CaP-OMVs@P<sub>2</sub>O-Ads, while the Ads (7×10<sup>5</sup> and 10<sup>7</sup>) were injected intratumorally. CD8<sup>+</sup> T cells  
 414 were extracted from each administration group based on the instructions of the BeaverBeads™  
 415 mouse CD8<sup>+</sup> T cell sorting kit (purchased from Beaver, 70903-100). Then, TC-1 cells were cultured  
 416 in cell culture plates. After the cells occupied 80% of the bottom, the medium was sucked out with a  
 417 2 mL syringe and washed twice with PBS. Then, CD8<sup>+</sup> T cells extracted from each administration  
 418 group were added into the holes based on the proportion of TC-1 cells: CD8<sup>+</sup> T cells =1:100 and  
 419 subsequently incubated at 37°C for 24 h. Next, the MTT assay helped investigate the tumor-killing

420 rate in each group.”

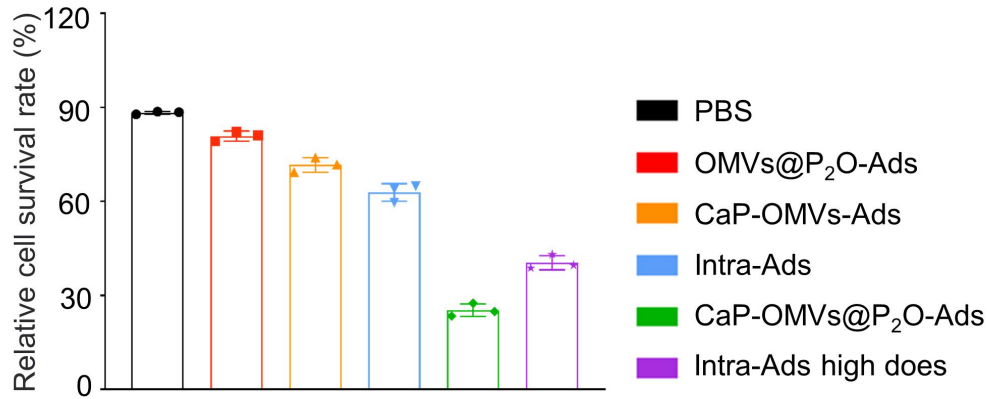

421 **Figure S32.** The experimental result of the co-culture assay. (It's worth noting here that PBS represents T cells  
422 extracted from mice in the PBS group, and other groups as above.)

423 In addition, the dependency of CD8 T cells was investigated *via* injecting CD8<sup>+</sup> T cells antibody.  
424 The detailed experimental method (section 4.24) and the experimental result (Figure S33) are as  
425 follows:

426 Method: “TC-1 cells (10<sup>6</sup>) were subcutaneously injected into the waist of female C57 mice, and  
427 tumor-bearing mice were divided into three groups (n=5). When the tumor reached the size of  
428 100–150 mm<sup>3</sup>, the mice were intravenously injected with PBS, CaP-OMVs@P<sub>2</sub>O-Ads, and  
429 CaP-OMVs@P<sub>2</sub>O-Ads plus CD8<sup>+</sup> T cells antibody (anti-CD8 antibodies, clone: 2.43, Bio X cell,  
430 cat. no.: BP0061, injected *i.v.* every two days starting one day before the CaP-OMVs@P<sub>2</sub>O-Ads  
431 injection) at 0, 3, 6, 9 day. On the 12<sup>th</sup> day of the efficacy experiment, the mice were sacrificed by  
432 cervical spine removal, and the tumor tissue was isolated, weighed, and photographed. The effects  
433 of the different preparations on tumor growth were analyzed and compared.”

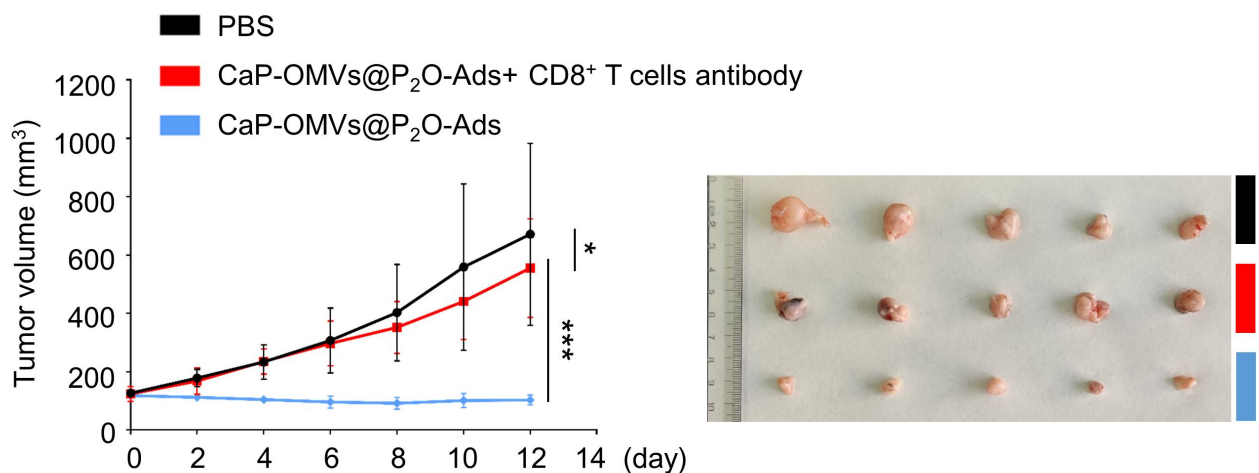

434 **Figure S33.** Tumor volume during the treatments and images of representative tumors of different treated groups  
435 on the 12<sup>th</sup> day (n=5).

## 436 **References**

- 437 1. Hamann J, Fiebig H, Strauss M. Expression cloning of the early activation antigen CD69, a  
438 type II integral membrane protein with a C-type lectin domain. *J Immunol* 150, 4920-4927  
439 (1993).

440 **Question 9:** Fig 5d-f: The flow cytometry was not well performed. Large amount of death cells  
441 leads to serious unspecific staining, which adversely affect the interpretation and quantification of  
442 the data. The authors should use live/dead dyes to exclude death cells and debris.

443 **Response:** We appreciate the reviewer's comments. Due to the interference of a large number of  
444 dead cells, the Fig 5d-f data were not satisfactory. Therefore, we re-modified the experiment as  
445 suggested by the reviewer including using live/dead dyes, and the results were shown below:

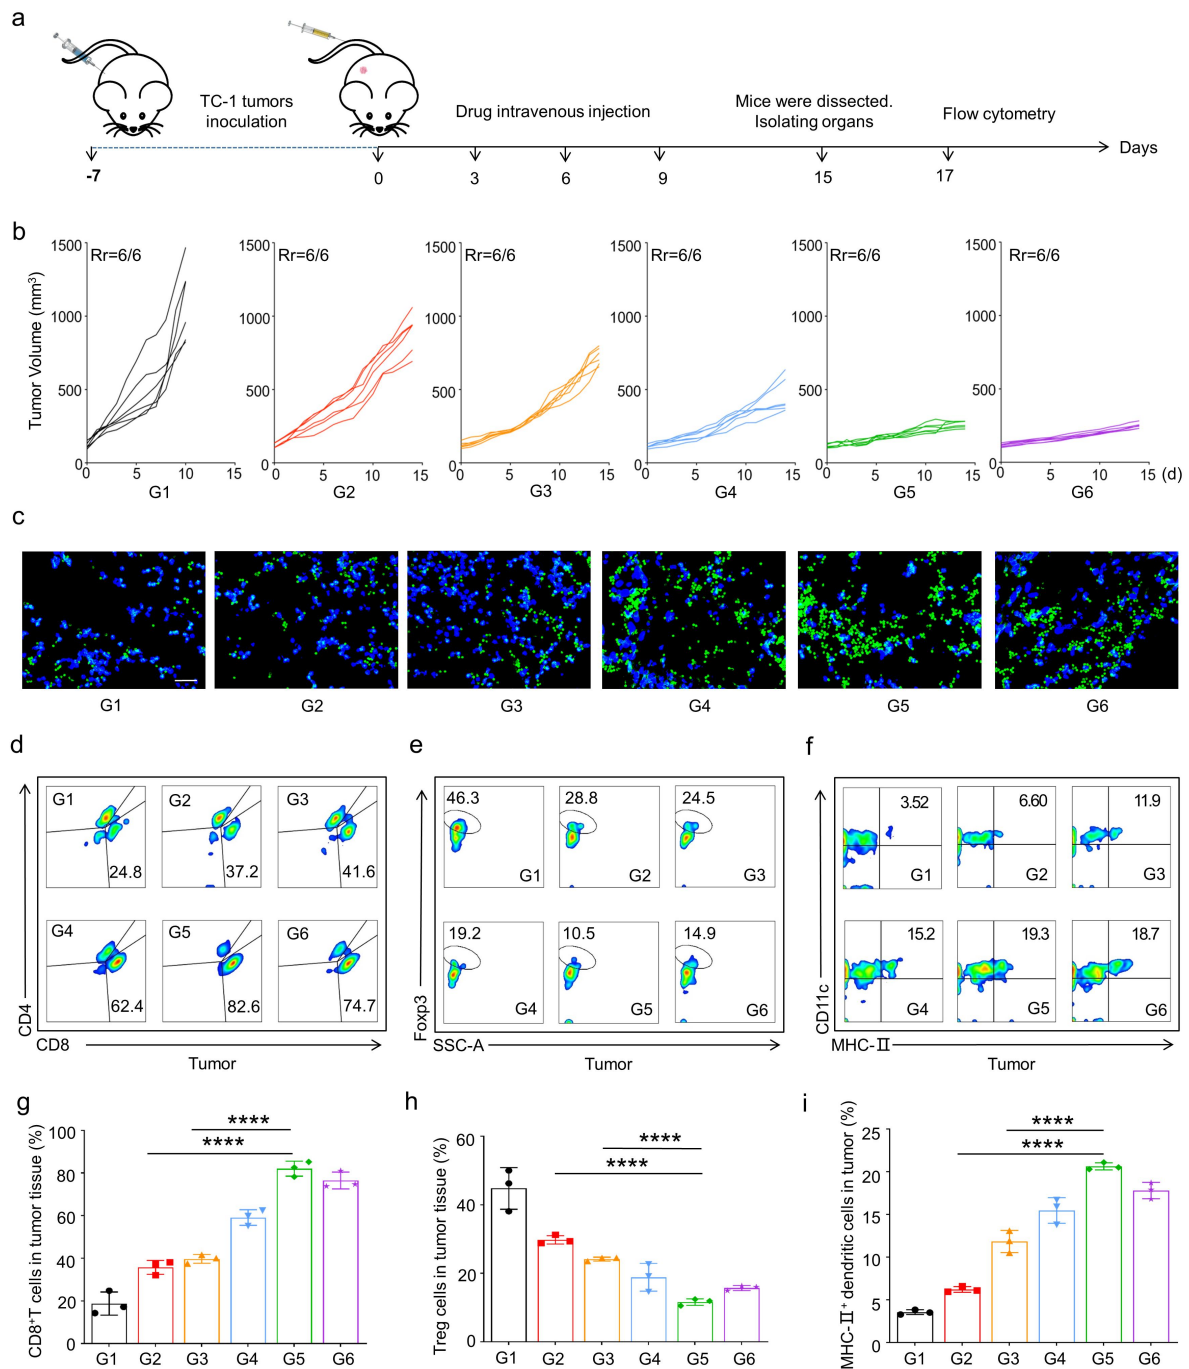

446 **Figure 5. *In vivo* oncolytic efficacy and immuneactivation capacity of the biomaterialized microbial**  
 447 **nanocomposite.** (a) Schematic illustration of the antitumor activity and immunity investigation of the  
 448 biomaterialized microbial nanocomposite on TC-1-hCD46 xenograft tumor-bearing C57 female mice model. (b)  
 449 Individual tumor growth kinetics in different groups (n=6). (c) The immunofluorescence images of CD8<sup>+</sup> T cells  
 450 in tumor tissues. Scale bars=50 $\mu\text{m}$ . (d) Representative flow cytometric evolution images (g) as well as relative  
 451 quantification of CD8<sup>+</sup> T cells (CD45<sup>+</sup>CD3<sup>+</sup>CD8<sup>+</sup>) in the tumor (n=3). (e) Representative flow cytometric  
 452 evolution images (h) as well as relative quantification of Treg cells (CD45<sup>+</sup>CD3<sup>+</sup>CD4<sup>+</sup>Fopx3<sup>+</sup>) in the tumor (n=3).  
 453 (f) Representative flow cytometric evolution images (i) and relative quantification of MHC-II<sup>+</sup> DC cells  
 454 (CD45<sup>+</sup>CD11c<sup>+</sup>MHC-II<sup>+</sup>) in the tumor (n=3). \* $p < 0.05$ , \*\* $p < 0.01$ , \*\*\* $p < 0.001$ , \*\*\*\* $p < 0.0001$  versus control. (G1:

455 PBS, G2: OMVs@P<sub>2</sub>O-Ads, G3: CaP-OMVs-Ads, G4: Intra-Ads, G5: CaP-OMVs@P<sub>2</sub>O-Ads, G6: Intra-Ads high  
456 does).

457 **Question 10:** Fig 5f: Since most, if not all, antigen presenting cells (APCs) express CD80 and  
458 CD86, these two markers are not specific enough to identify DCs. The authors should use CD11c  
459 and MHCII, instead.

460 **Response:** We appreciate the reviewer's comments. In Figure 5f and 5i, we have replaced  
461 CD80<sup>+</sup>CD86<sup>+</sup> DC cells with CD11c<sup>+</sup>MHC-II<sup>+</sup> DC cells in the revised manuscript. The statistical  
462 result (n=3) and the gating strategies of DCs (CD45<sup>+</sup>CD11c<sup>+</sup>MHC-II<sup>+</sup>) were shown as follows:





463 **Figure 5. *In vivo* oncolytic efficacy and immuneactivation capacity of the biomaterialized microbial**  
 464 **nanocomposite.** (a) Schematic illustration of the antitumor activity and immunity investigation of the  
 465 biomaterialized microbial nanocomposite on TC-1-hCD46 xenograft tumor-bearing C57 female mice model. (b)  
 466 Individual tumor growth kinetics in different groups (n=6). (c) The immunofluorescence images of CD8<sup>+</sup> T cells  
 467 in tumor tissues. Scale bars=50μm. (d) Representative flow cytometric evolution images (g) as well as relative  
 468 quantification of CD8<sup>+</sup> T cells (CD45<sup>+</sup>CD3<sup>+</sup>CD8<sup>+</sup>) in the tumor (n=3). (e) Representative flow cytometric  
 469 evolution images (h) as well as relative quantification of Treg cells (CD45<sup>+</sup>CD3<sup>+</sup>CD4<sup>+</sup>Fopx3<sup>+</sup>) in the tumor (n=3).  
 470 (f) Representative flow cytometric evolution images (i) and relative quantification of MHC-II<sup>+</sup> DC cells  
 471 (CD45<sup>+</sup>CD11c<sup>+</sup>MHC-II<sup>+</sup>) in the tumor (n=3). \**p*<0.05, \*\**p*<0.01, \*\*\**p*<0.001, \*\*\*\**p*<0.0001 versus control. (G1:

472 PBS, G2: OMVs@P<sub>2</sub>O-Ads, G3: CaP-OMVs-Ads, G4: Intra-Ads, G5: CaP-OMVs@P<sub>2</sub>O-Ads, G6: Intra-Ads high  
473 does).

474 **Question 11:** Discussion section is missing in the current manuscript.

475 **Response:** We appreciate the reviewer's comments. To help reviewers and readers better  
476 understand the research content of this project, we have included the discussion section in the  
477 revised manuscript (page 22):

478 “Oncolytic virotherapy is a novel type of immunotherapy inducing antitumor responses through  
479 selective self-replication inside cancer cells and oncolytic virus (OV)-mediated immunostimulation.  
480 It has attracted more attention recently. However, although OVT has incredible advantages in  
481 cancer treatment, the clinical practice of commercial OVs is not perfect. The three oncolytic viral  
482 drugs marketed globally are administered by intratumoral injection. This significantly increases the  
483 difficulty of clinical treatment and decreases medication compliance in patients. In addition, some  
484 clinical trials have attempted to deliver OVs systematically, with unsatisfactory clinical results.

485 We constructed the microbial nanocomposite for the first time for autophagy-cascade-augmented  
486 immunotherapy. The oncolytic Ads were encapsulated using the engineered OMVs extracted from  
487 *E. coli* and transfected with plasmid to express P<sub>2</sub>O. CaP biomineral shells were added to protect  
488 Ads from the clearance of the innate immune system. Therefore, it extends the *in vivo* circulation  
489 time and promotes Ads enrichment after systemic administration. More importantly, P<sub>2</sub>O-catalyzed  
490 H<sub>2</sub>O<sub>2</sub> elevated the level of oxidative stress in the tumor site, leading to autophagy formation. The  
491 increase in the number of autophagy-induced autophagosomes would significantly augment the  
492 replication efficiency of Ads in OVs-infected cancer cells. Meanwhile, enhanced OVs intratumoral  
493 enrichment augmented OVs replication in tumors and immunosuppressive TEM remodeling based  
494 on the advantage of the immunostimulatory capability of OMVs. This would enhance  
495 OVs-mediated immune responses. Overall, the current autophagy-cascade-boosted immunotherapy  
496 strategy would be promising in OVs-based biomedical therapy applications.”

497 Minor concerns:

498 **Question 1:** The language of the paper could be improved with some editing.

499 **Response:** We appreciate the reviewer's comments. The revised manuscript was checked out

500 carefully by ourselves and to better improve the readability of the manuscript, we had sent it for  
501 language revision by language revision by Mogoedit language editing service on 23-Feb-2023.

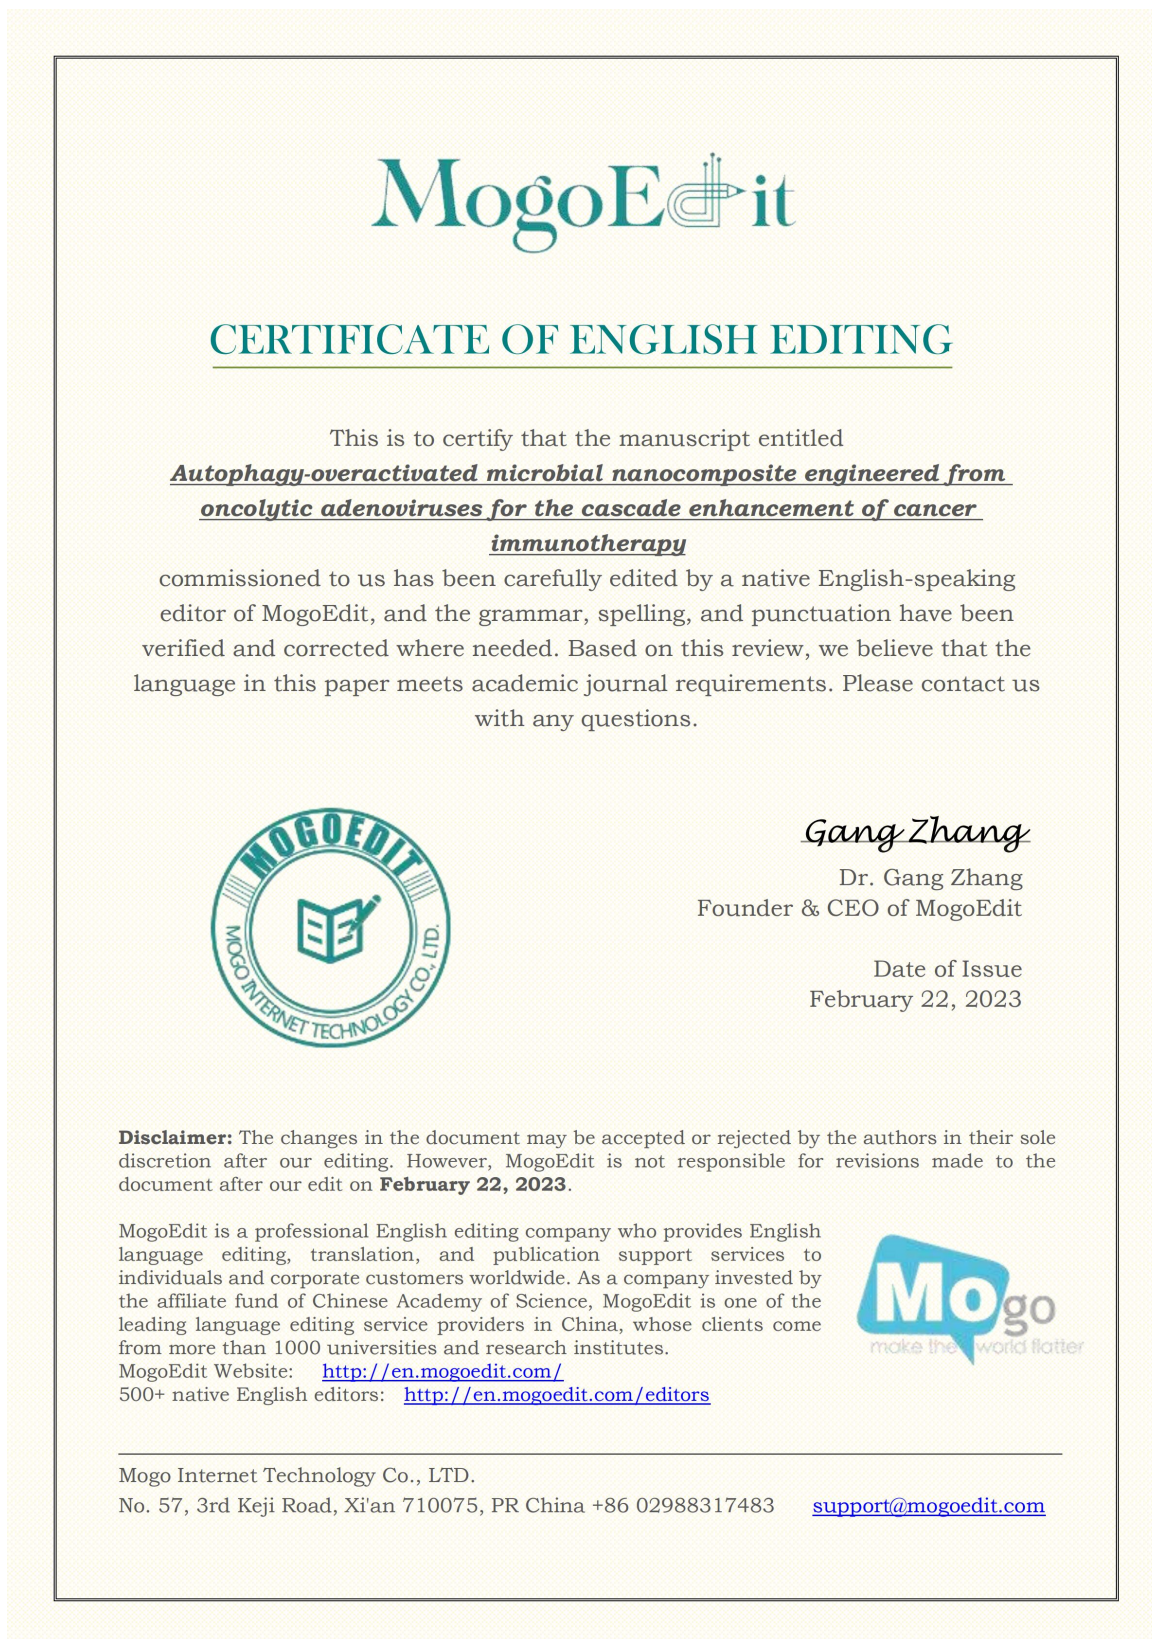

502 **Figure.** The certificate of MogoEdit language editing services on 23-Feb-2023.

503 **Question 2:** It would be better to have an introduction of the advantages and disadvantages of  
504 bacterial outer membrane vesicles. Are OMVs better than other nanomaterials? Are there any  
505 potential safety concerns?

506 **Response:** We appreciate the reviewer's comments. The application of OMVs in the field of drug  
507 delivery has been extensively reported recently ascribed to its intuitive advantages. First, it has  
508 nanoscale particle size, sufficient internal space and wide membrane area to act as a delivery carrier  
509 for a variety of drugs such as Ads. In addition, inheriting various immunostimulatory components  
510 such as lipopolysaccharide (LPS) from their parent bacteria, OMVs also represent a natural immune  
511 activator possessing ability to turn the "cold tumor" into "hot tumor"<sup>1</sup>. Furthermore, abandoning  
512 the proliferation ability of the parent bacteria, OMVs has higher controllability and safety than  
513 bacteria<sup>2</sup>. In our subject, engineered bacterial outer membrane vesicles (OMVs@P<sub>2</sub>O) are an  
514 irreplaceable component. On the one hand, as mentioned above, serving as the vector for systemic  
515 delivery of the Ads, OMVs@P<sub>2</sub>O could protect Ads from recognition and clearance by neutralizing  
516 antibodies. And as the natural immune activator, OMVs@P<sub>2</sub>O could remould the suppressive tumor  
517 immune microenvironment for the further oncolytic viral immunotherapy. On the other hand,  
518 OMVs@P<sub>2</sub>O naturally carries pyranose oxidase, which could catalyze the production of ROS at the  
519 tumor site and trigger excessive autophagy, thereby improving the replication of Ads in tumor cells.  
520 Overall, OMVs represents an irreplaceable carrier material for the construction of  
521 autophagy-overactivated microbial nanocomposite.

## 522 **References**

- 523 1. Cheng K, et al. Bioengineered bacteria-derived outer membrane vesicles as a versatile antigen  
524 display platform for tumor vaccination via Plug-and-Display technology. Nat Commun 12, 2041  
525 (2021).
- 526 2. Jahromi LP, Fuhrmann G. Bacterial extracellular vesicles: Understanding biology promotes  
527 applications as nanopharmaceuticals. Adv Drug Deliv Rev 173, 125-140 (2021).

528 **Question 3:** Figure 1 is missing.

529 **Response:** We are sorry that Figure 1 had been not shown in the manuscript. We have attached  
530 Figure 1 here and added it to the revised manuscript (page 6).

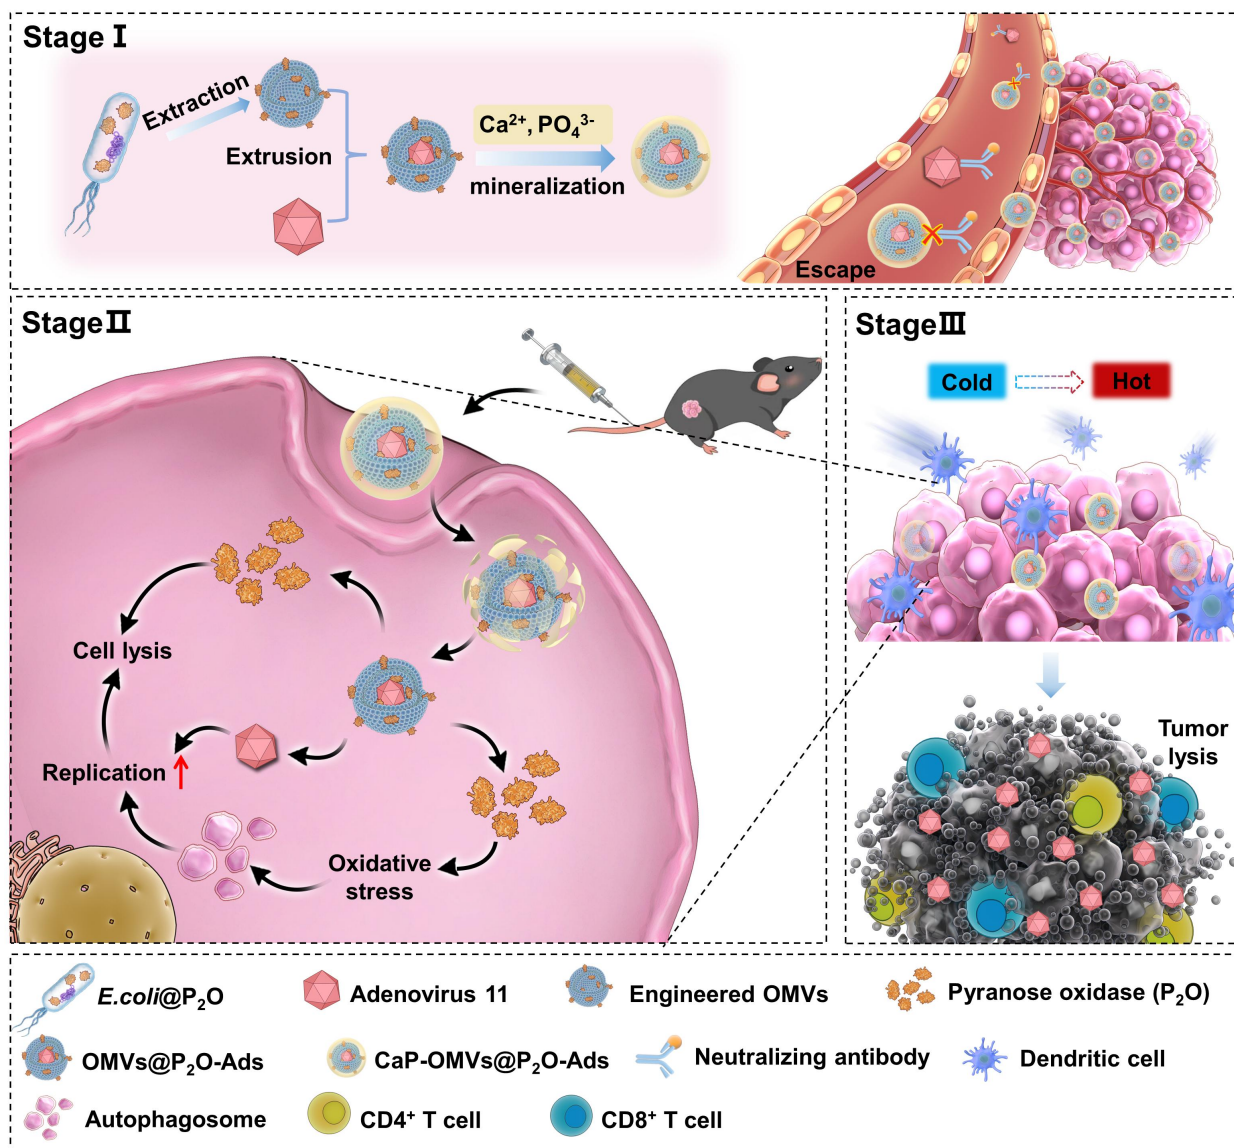

531 **Figure 1. Schematic diagram.** The biomineralized microbial nanocomposite engineered from OVVs for  
 532 autophagy-cascade-augmented immunotherapy.

533 **Question 4:** Fig 2g is missing.

534 **Response:** We appreciate the reviewer's comments. The Figure 2 had been added as follow:

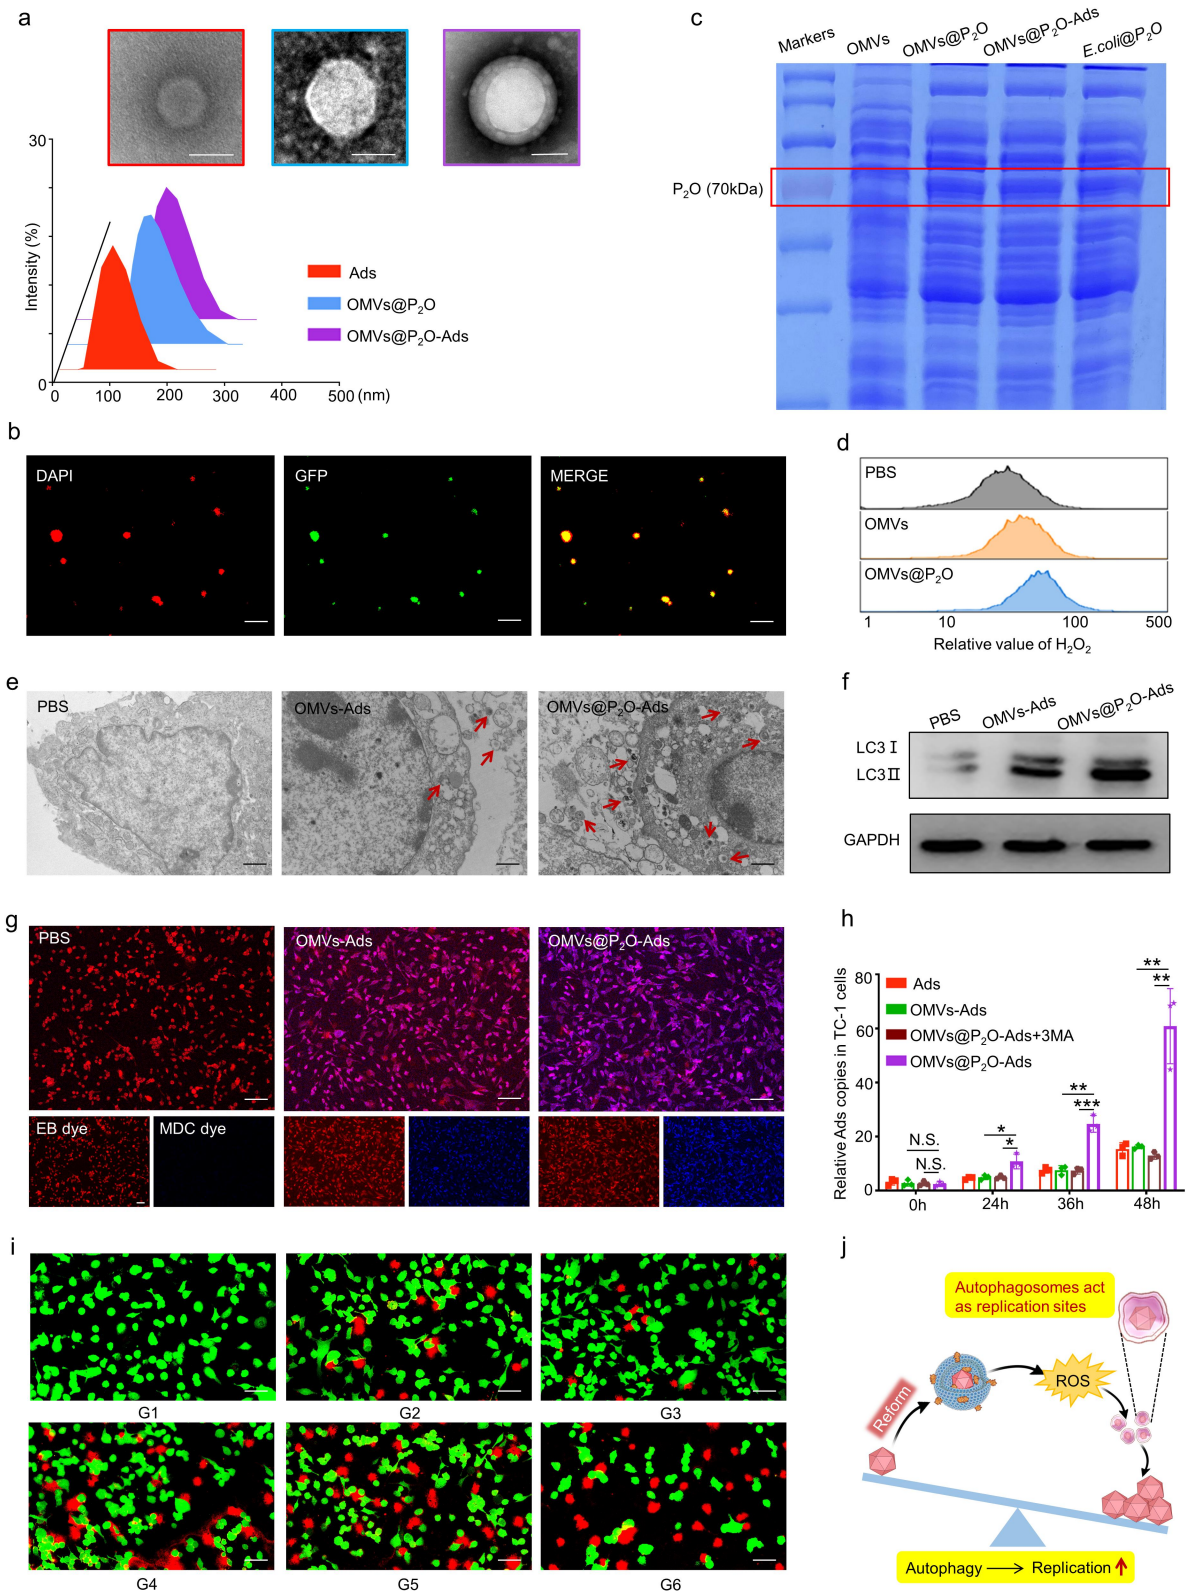

535 **Figure 2. Preparation and *in vitro* evaluation of the microbial nanocomposite.** (a) TEM and size distribution  
 536 images of Ads, OMVs@P<sub>2</sub>O, and OMVs@P<sub>2</sub>O-Ads. Scale bar=100 nm. (b) CLSM images of the microbial  
 537 nanocomposite. Ads were stained with DAPI dye (red) and OMVs carried a GFP marker (green). Scale bar=1 μm.  
 538 (c) The expression of P<sub>2</sub>O was investigated by the SDS-PAGE method. (d) The ROS level assessment in TC-1

539 cells by flow cytometry. (e) TEM images of autophagosomes. Scale bar=200 nm. (f) The expression of  
540 autophagy-related protein LC3-I and LC3-II by western bolt analyses. (g) CLSM images of autophagosomes.  
541 Cells were stained with EB dye (red) and autophagosomes were stained with MDC dye (blue). Scale bar=50  $\mu$ m.  
542 (h) The Ads replication in TC-1 cells was quantified using real-time PCR at 0, 24, 36, and 48 h sequentially. 3MA  
543 is an autophagy inhibitor: 3-Methyladenine. (i) Cytotoxicity of different formulations in TC-1 cells by CLSM.  
544 Living cells were stained with Calcein (green) and dead cells were stained with PI (red). Scale bar=20  $\mu$ m. (j)  
545 Schematic diagram of bridging ROS with oncolytic Ads replication. \* $p$ <0.05, \*\* $p$ <0.01, \*\*\* $p$ <0.001,  
546 \*\*\*\* $p$ <0.0001 versus control.

547 **Question 5:** Fig 2j: What do G1~G6 represent? The authors should mention this information in the  
548 figure legends.

549 **Response:** We are sorry to make the reviewer confused. The meaning of G1~G6 are as follows: G1:  
550 PBS, G2: Ads, G3: OMVs, G4: OMVs@P2O, G5: OMVs-Ads, G6: OMVs@P2O-Ads. And we  
551 also present this information in the legend in the manuscripts (page 10).

552 **Question 6:** Fig 2k should be mentioned at least once in the manuscript.

553 **Response:** We agree with the reviewer's comments. In the revised manuscript, this part was  
554 modified as (page 8): "Autophagy-generated internal double-membrane-bound vesicles  
555 (autophagosomes) could be Ads replication sites within Ads-infected tumor cells. This effectively  
556 enhanced Ads replication through the autophagy pathway (Figure 2j)."

557 **Question 7:** Fig S7: Only 6 columns are presented, but x-axis has 8 groups.

558 **Response:** We are sorry for the mistake of marking the number in the post-processing of the Figure  
559 S9. The amendatory Figure S9 was updated as follow:

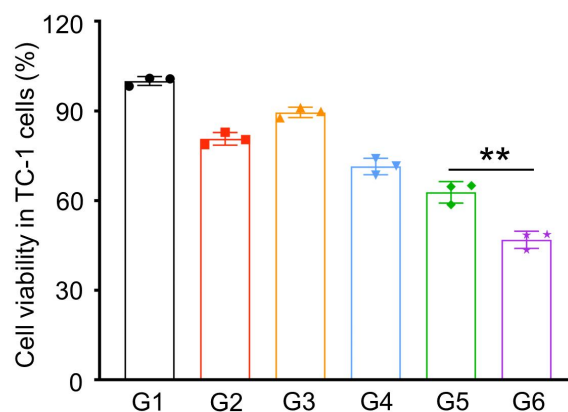

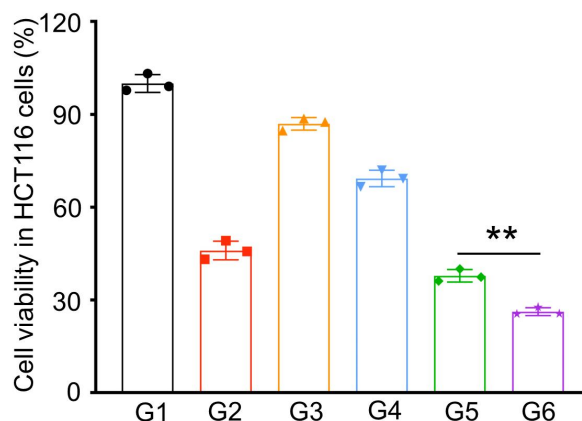

560 **Figure S9.** Cytotoxicity of different formulations in TC-1 cells and HCT116 cells by MTT assay. (G1: PBS, G2:  
561 Ads, G3: OMVs, G4: OMVs@P<sub>2</sub>O, G5: OMVs-Ads, G6: OMVs@P<sub>2</sub>O-Ads).

562 **Question 8:** Fig S8/5b/6c: What does “Rr=6/6” or “Rr=5/5” mean?

563 **Response:** We appreciate the reviewer’s comments. “Rr” represents the real survival rate of mice in  
564 each group during pharmacodynamic investigation. “Rr=6/6” or “Rr=5/5” represents that there was  
565 no death of 6 (5) mice in each group (n=6 or n=5) during pharmacodynamic investigation.

566 **Question 9:** Fig S10: What do G1~G6 represent here. Are they the same with Fig S9? The authors  
567 should mention this information in the figure legends.

568 **Response:** We are sorry to make the reviewer confused. The meanings of G1~G6 were the same  
569 with Figure S9, namely G1: PBS, G2: Ads, G3: OMVs, G4: OMVs@P<sub>2</sub>O, G5: OMVs-Ads, G6:  
570 OMVs@P<sub>2</sub>O-Ads. In the revised manuscript, the revisionary legends of Figure S10 was mentioned.

571 **Question 10:** The authors should explain why they use TC-1-hCD46. Indeed, hCD46 is the receptor  
572 for adenovirus.

573 **Response:** We appreciate the reviewer’s question. The oncolytic ad11-tel (ad11) was supplied by  
574 Beijing Bio-Targeting Therapeutics Technology Co., Ltd (China). Oncolytic viruses cannot infect  
575 most murine tumor cells because there are no marker molecules on the murine cancer cell surface  
576 that are recognizable to the oncolytic virus. To investigate the use of oncolytic virus in mouse  
577 animal models, we used engineered TC-1-hCD46 murine tumor cell lines by introducing human  
578 CD46 receptor expression plasmid into the murine cancer cells. The oncolytic virus could infect and



579 replicate in TC-1 cells *via* human CD46 receptors expressed on the cell surface.

580 **Question 11:** Misspell: “wight” in section 2.2.

581 **Response:** We appreciate the reviewer’s comments. In the revised manuscript, this misspell was  
582 modified as (page 10): “weight”.

583 **Question 12:** Fig 3a: The authors ought to give a brief introduction of DiR dye.

584 **Response:** We agree with the reviewer’s comments. In the revised manuscript, this part was  
585 modified in section 4.11 as (page 27): “DIR is a type of long-chain lipophilic dialkylcarbocyanine  
586 dye. Owing to its lipophilicity, DIR is often used to label cell membranes as well as other  
587 liposoluble biological structures including OMVs. The maximum excitation and emission  
588 wavelengths of DIR are 750nm and 780nm, respectively. Because the infrared light emitted by DiR  
589 can efficiently pass through cells and tissues, it is of great significance in *in vivo* imaging or  
590 tracking.”

591 **Question 13:** Figure 4: It would be better for the authors to explain why CaP-OMVs exhibit better  
592 tumor selectivity than OMVs.

593 **Response:** We appreciate the reviewer’s comments. OMVs might still rapidly cause severe  
594 systemic inflammatory response and antibody-mediated clearance. Thus, a "masking" strategy was  
595 adopted in which we used the highly biocompatible calcium phosphate (CaP) to encapsulate OMVs.  
596 Upon the microbial nanocomposite arrival at tumors through EPR effect, the slightly acidic pH of  
597 TME triggered the dissolution of CaP shells, thereby OMVs@P<sub>2</sub>O and Ads would be exposed and  
598 play their functions severally.

599 **Question 14:** Fig 4b: What do C, O, P, S, Ca, and Ca+P stand for?

600 **Response:** We appreciate the reviewer’s comments. C, O, P, S, Ca, and Ca+P represent element  
601 abbreviations, namely carbon, oxygen, phosphorus, sulphur, calcium and co-localization of calcium  
602 with phosphorus. The revised figure was removed to Figure S14.

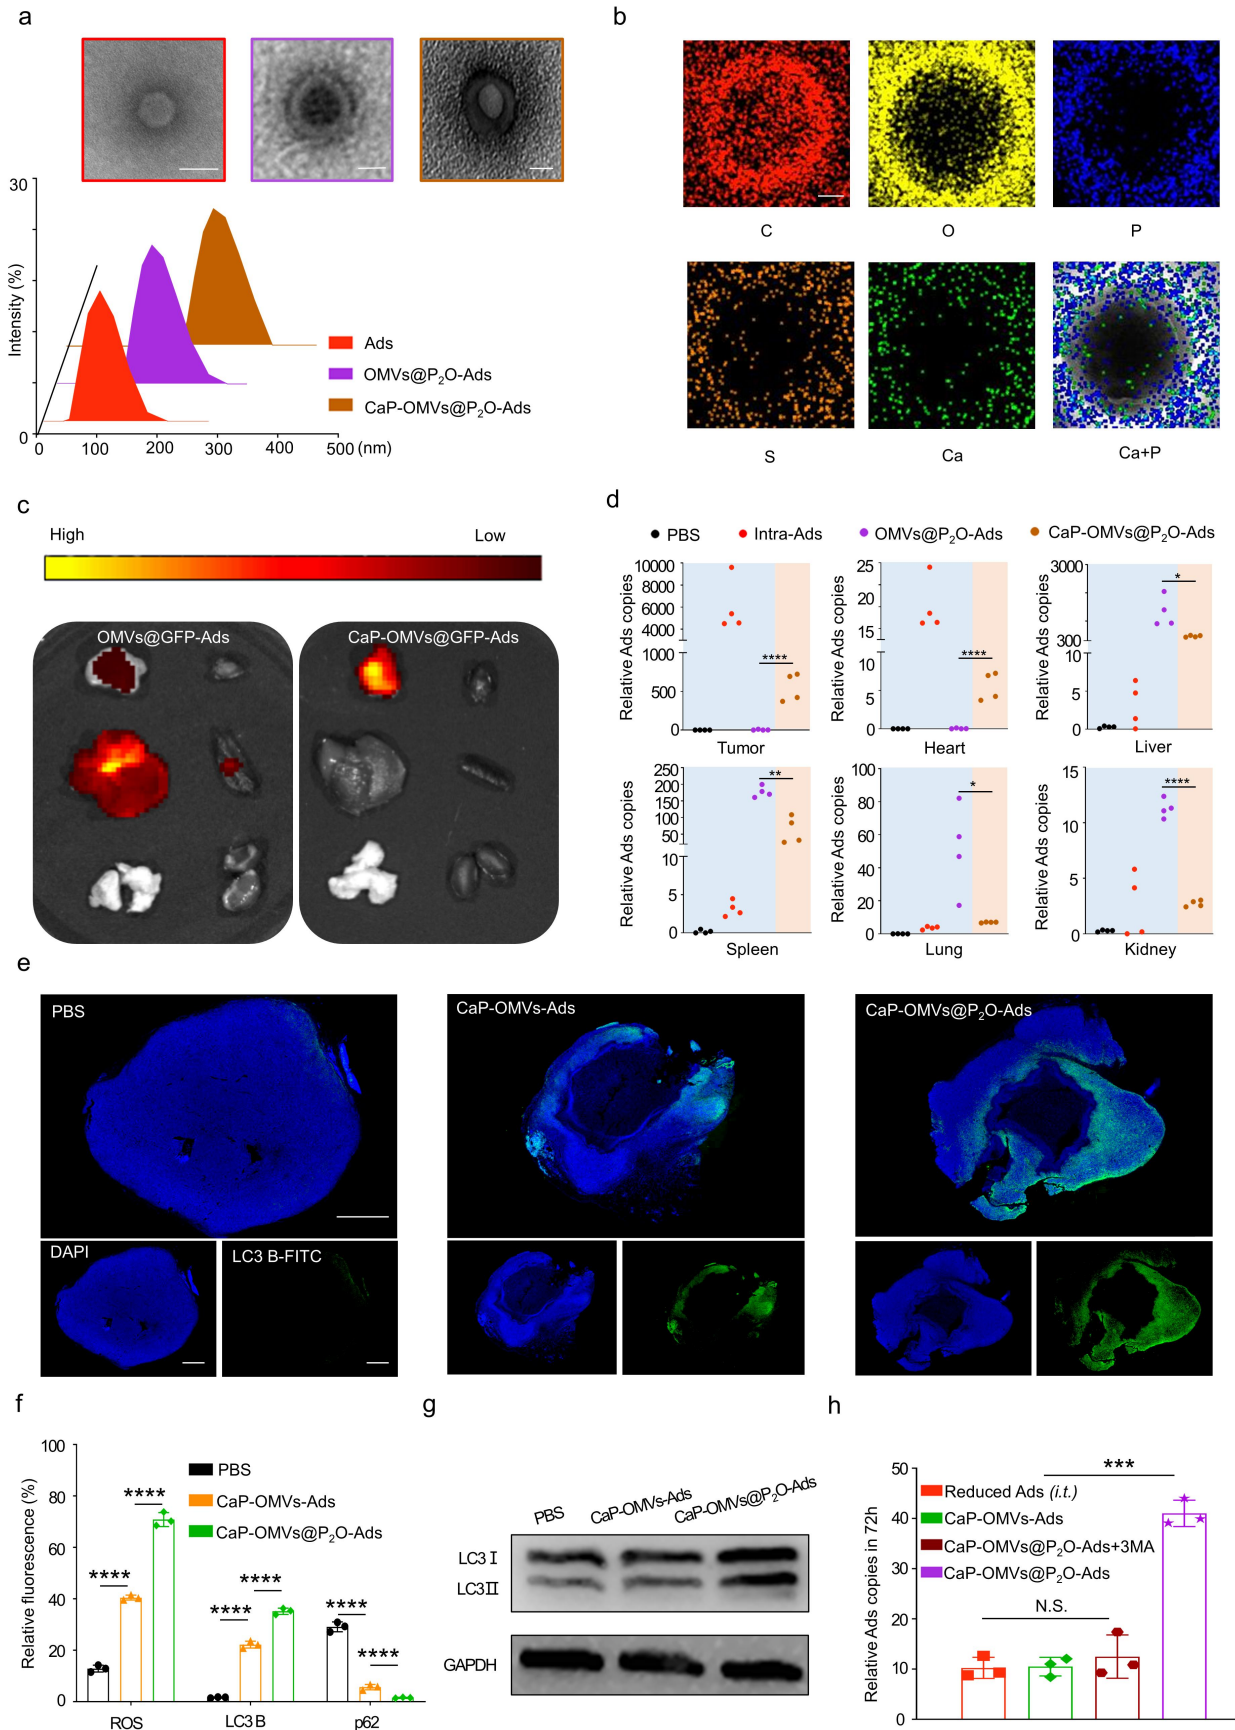

603 **Figure 4. Preparation and *in vivo* evaluation of the biom mineralized microbial nanocomposite.** (a) TEM and  
 604 size distribution images of Ads, OMVs@P<sub>2</sub>O-Ads, and CaP-OMVs@P<sub>2</sub>O-Ads. Scale bar=100 nm. (b) Energy

605 spectrum analysis image of the biom mineralized composite microbe. Scale bar=50 nm. (c) *In vivo* fluorescence  
 606 imaging of the multiple organs and tumors collected from the mice at 24 h post *i.v.* injection. From left to right:  
 607 tumor, heart, liver, spleen, lung, and kidney. (d) Quantitation of the biodistribution of relative Ads contents in  
 608 multiple organs and tumors after 24 h of different treatments by RT-qPCR (n=4). (e) Immunofluorescence images  
 609 of LC3 autophagic proteins in tumor tissues. Blue represents DAPI-stained tumor cells and the green represents  
 610 FITC-stained LC3 autophagic protein. Scale bar=2 mm. (f) Quantitative analysis of fluorescence intensity. (g) The  
 611 expression of autophagy-related protein LC3-I and LC3-II examined by western blot. (h) Quantitation of relative  
 612 Ads content in the tumor after 72 h of different treatments by RT-qPCR technique (n=3). \* $p < 0.05$ , \*\* $p < 0.01$ ,  
 613 \*\*\* $p < 0.001$ , \*\*\*\* $p < 0.0001$  versus control. \* $p < 0.05$ , \*\* $p < 0.01$ , \*\*\* $p < 0.001$ , \*\*\*\* $p < 0.0001$  versus control.

614 **Question 15:** Fig S22-23: Gating strategies should also be presented.

615 **Response:** We appreciate the reviewer's comments. Gating strategies had been presented in Figure  
 616 S30 in the revised manuscript.

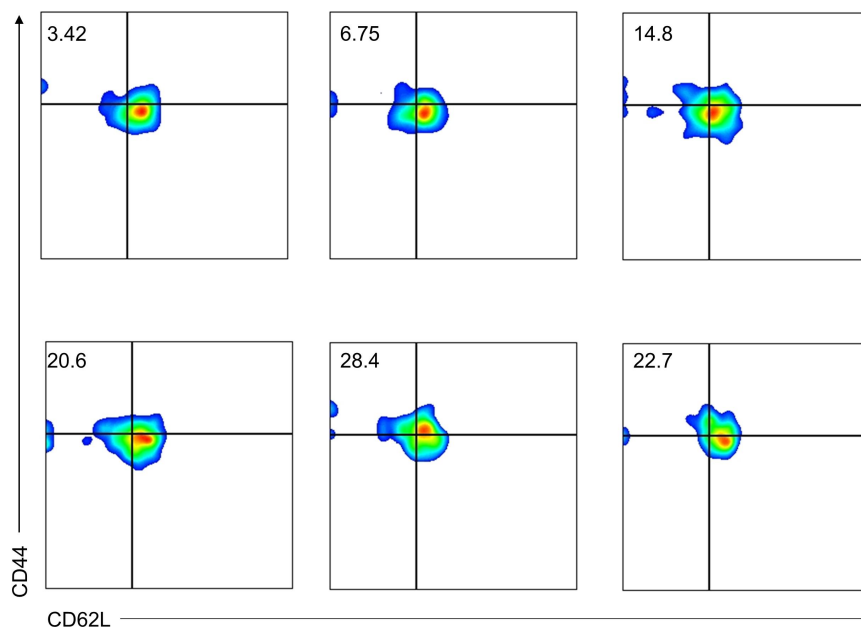

617 **Figure S30.** The gating strategy of effector memory T cells (CD3<sup>+</sup> CD8<sup>+</sup> CD62L<sup>-</sup> CD44<sup>+</sup>) in spleen (n=3). (G1:  
 618 PBS, G2: OMVs@P<sub>2</sub>O-Ads, G3: CaP-OMVs-Ads, G4: Intra-Ads, G5: CaP-OMVs@P<sub>2</sub>O-Ads, G6: Intra-Ads high  
 619 dose).

620 **Question 16:** Fig S9/S16/S17/S24/3c/: What do the dotted lines represent?

621 **Response:** We are sorry to make the reviewer confused. The dotted lines represent error bars here.  
 622 To make the figure information more intuitive for reviewers and readers, we replace the dotted lines  
 623 with the traditional error bars.

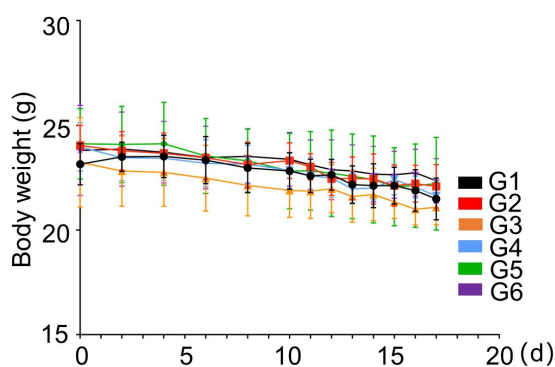

624 **Figure S13.** Body weight changes of TC-1-bearing mice after intratumoral administration of different  
 625 formulations (n=6). (G1: PBS, G2: Ads, G3: OMVs, G4: OMVs@P<sub>2</sub>O, G5: OMVs-Ads, G6: OMVs@P<sub>2</sub>O-Ads).

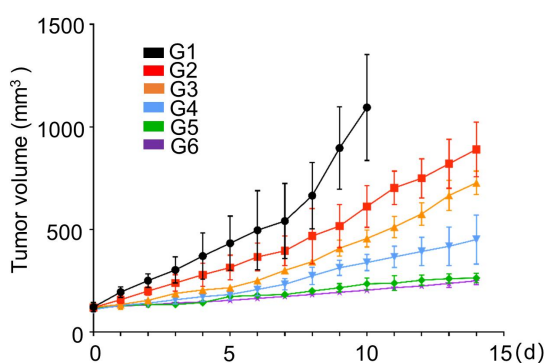

626 **Figure S19.** The tumor of TC-1-bearing mice model volume change for TC-1 xenograft tumor model during  
 627 different treatments (n=6). \*\*\*\*p<0.0001 versus control. (G1: PBS, G2: OMVs@P<sub>2</sub>O-Ads, G3: CaP-OMVs-Ads,  
 628 G4: Intra-Ads, G5: CaP-OMVs@P<sub>2</sub>O-Ads, G6: Intra-Ads high does).

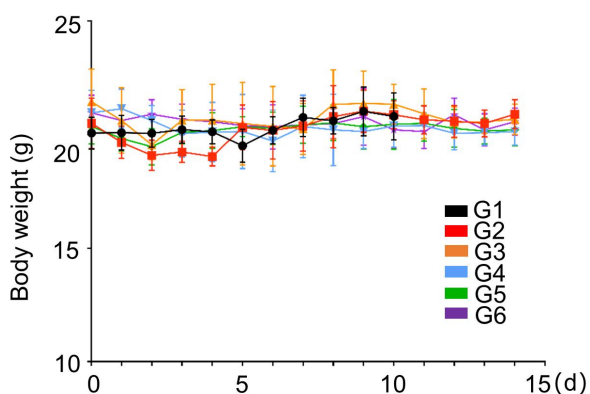

629 **Figure S20.** Body weight changes of TC-1-bearing mice after administration of different formulations (n=6). (G1:  
 630 PBS, G2: OMVs@P<sub>2</sub>O-Ads, G3: CaP-OMVs-Ads, G4: Intra-Ads, G5: CaP-OMVs@P<sub>2</sub>O-Ads, G6: Intra-Ads high  
 631 does).

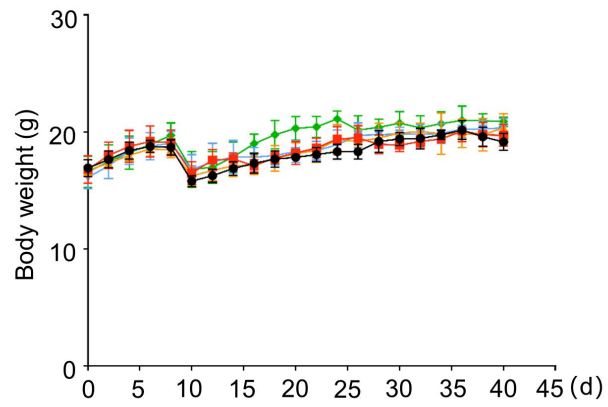

632 **Figure S34.** Body weight changes of TC-1-bearing mice after administration of different formulations (n=5). (G1:  
633 PBS, G2: OMVs@P<sub>2</sub>O-Ads, G3: CaP-OMVs-Ads, G4: Intra-Ads, G5: CaP-OMVs@P<sub>2</sub>O-Ads).



634 **Figure 3. *In vivo* oncolytic efficacy of the microbial nanocomposite.** (a) *In vivo* DIR fluorescent imaging of the  
635 microbial nanocomposite in TC-1-hCD46 xenograft tumor-bearing mice by IVIS. (b) Schematic illustration of the  
636 antitumor activity and immunology assessment experiments of the microbial nanocomposite using TC-1-hCD46  
637 xenograft tumor-bearing C57 female mice model. TC-1 cells ( $10^6$ ) were subcutaneously injected into the waist of  
638 female C57 mice, and the tumor-bearing mice were divided into six groups ( $n=6$ ). When the tumor reached  
639 100-150  $\text{mm}^3$ , the mice were injected intratumorally with PBS, Ads ( $7 \times 10^5$  PFU), OMVs, OMVs@P<sub>2</sub>O,  
640 OMVs-Ads ( $7 \times 10^5$  PFU), and OMVs@P<sub>2</sub>O-Ads ( $7 \times 10^5$  PFU). The drug was given every three days for four  
641 consecutive times, the tumor volume was measured with a vernier caliper, and mice were weighed daily. (c)  
642 **Tumor volume growth profiles of C57 mice bearing TC-1 xenografts.** (d) Images of representative tumors of  
643 different treated groups on the 18<sup>th</sup> day ( $n=6$ ). (e) Statistical graph of tumor weight of different treated groups  
644 on the 18<sup>th</sup> day ( $n=6$ ). (f-h) Images of concentration of main cytokines in serum. (i) The differential gene expression  
645 between the samples treated with OMVs@P<sub>2</sub>O-Ads and PBS, using the absolute value of logFC greater than 1 as

646 the threshold. (j) GSEA enriched pathways of the up-regulated genes in the samples treated with  
647 OMVs@P<sub>2</sub>O-Ads, showing immune-related terms. (k) Gene set enrichment analysis (GSEA) of the term  
648 “Activation of immune response”, and the genes included in this pathway are highlighted in (i) with light yellow  
649 brown. \* $p < 0.05$ , \*\* $p < 0.01$ , \*\*\* $p < 0.001$ , \*\*\*\* $p < 0.0001$  versus control. (G1: PBS, G2: Ads, G3: OMVs, G4:  
650 OMVs@P<sub>2</sub>O, G5: OMVs-Ads, G6: OMVs@P<sub>2</sub>O-Ads).

651 **Question 17:** Section 2.5: Some OV<sub>s</sub> in clinical trials, including vaccinia virus and reovirus, are  
652 systemically delivered. The authors should mention this and compare the CaP-OMVs technology  
653 with these intravenous OV<sub>s</sub>.

654 **Response:** We appreciate the reviewer’s comments. In the beginning of section 2.5, we mistakenly  
655 said "marketed product" instead of "clinical research stage". In the revised manuscript, this part was  
656 modified in section 2.5 as (page 19): “All marketed OV<sub>s</sub> products are delivered by intratumoral or  
657 topical administration rather than intravenous administration.”

658 We published a review article entitled "Emerging systemic delivery strategies of oncolytic  
659 viruses: A key step toward cancer immunotherapy" in 2021, which introduces the foundation of  
660 clinical trials of OVT to date<sup>1</sup>. Although, in clinical trials, there are cases of systemic delivery of  
661 vaccinia virus and reovirus products, it’s still necessary to develop the systemic Ads products due to  
662 its innate advantages. On the one hand, compared with RNA oncolytic virus such as reovirus, Ads  
663 possess higher genetic stability in the process of self-replication in tumor cells, which could ensure  
664 the ability of the virus to infect and kill tumor cells after repetitive replication, thereby maintaining  
665 a low toxicity and high efficiency cancer treatment. On the other hand, compared with vaccinia  
666 virus, Ads have the prospect of product transformation because of lower cost of production.

667 Herein, constructing the biomaterialized microbial nanocomposite *via* OMVs encapsulation and  
668 biomimetic mineralization technology, we successfully resolved the problem in Ads’ systemic  
669 delivery, including recognition and clearance of neutralizing antibodies, low replication efficiency  
670 in tumor cells and unsatisfactory capacity for immune activation in tumor site. Overall, we firmly  
671 believe that Ads-based systemic delivery possesses the development necessity and we have  
672 provided an ideal strategy in this manuscript.

## 673 References

674 1. Ban W, et al. Emerging systemic delivery strategies of oncolytic viruses: A key step toward

675 cancer immunotherapy. Nano Res 15, 4137-4153 (2022).

676 **Question 18:** Section 3: What dose “the oncolytic Ads extracted from *E. coli*” mean? Ads is grown  
677 in HEK293 cells?

678 **Response:** We are sorry to make the reviewer confused. In the revised manuscript, this part was  
679 modified in section 3 as (page 21): “The oncolytic Ads were encapsulated using the engineered  
680 OMVs extracted from *E. coli* and transfected with plasmid to express P<sub>2</sub>O.”



681 **Reviewer #3:** In the current study, the authors design and develop a modified oncolytic adenovirus  
682 to address the intrinsic drawbacks of the virus. They used biomineral bacterial outer membrane  
683 vesicles encapsulated adenovirus to stimulate autophagy and antitumor immunity. The integrated  
684 immunotherapy is timely and critical for improving the clinical applications of the oncologic  
685 adenovirus and will attract significant attentions from broad readership. There are some important  
686 issues the authors should consider to clarify or improve in the revised version.

687 **Question 1:** The logic to integrate various components is rather weak and it is recommended for the  
688 authors to clarify in the manuscript. Are these components being replaceable or necessary? It is a  
689 complicated system and it is hardly be treated as composite microbe. It is recommended to change  
690 the word with nanocomposite or nanosystem.

691 **Response:** We accept the reviewer's proposal to replace "composite microbe" with "microbial  
692 nanocomposite". Oncolytic virotherapy (OVT) is a novel type of immunotherapy that induces  
693 anti-tumor response through selective self-replication within cancer cells and oncolytic virus  
694 (OV)-mediated immunostimulation. However, there are some disadvantages impeding the clinical  
695 practice of commercial OVs, including the poor immune activation capacity and the neutralizing  
696 antibodies elimination. In our study, the engineered OMVs@P<sub>2</sub>O was applied to activate anti-tumor  
697 immunity and increasing the replication of Ads in tumor tissue through inducing overactivated  
698 autophagy of tumor cells. Besides, the biomineral calcium phosphate (CaP) shell was used to  
699 protect OMVs@P<sub>2</sub>O-Ads from neutralizing antibodies and immune cells. Overall, this Ads delivery  
700 platform described in our manuscript provides the unique insight for clinical applications of  
701 enhanced OVs-mediated cancer immunotherapy, and all of the various components are obligato  
702 and irreplaceable.

703 **Question 2:** How the adenovirus loaded into OMV? What is the efficacy and any improvement  
704 have been tried?

705 **Response:** We appreciate the reviewer's questions. In our manuscript, the adenovirus was entered  
706 into the OMV by continuous extrusion through the 200 nm filtration membrane. We demonstrated  
707 that the encapsulation efficiency of OMVs-Ads was more than 90% by fluorescence quenching  
708 experiments with heavy metal ions.

709 In addition to the extrusion method, we also tried the ultrasound method and the combination of

710 the two methods to encapsulate adenovirus in OMV. As shown in following Figure, the  
 711 encapsulation efficiency of OMVs-Ads obtained *via* the ultrasound method was lower than the  
 712 extrusion method, and there was no significant improvement observed in the combination group.  
 713 The experimental procedures for fluorescence quenching experiments were as follows. Overall, the  
 714 extrusion method was selected as the most appropriate preparation method of OMVs-Ads in the  
 715 manuscript.

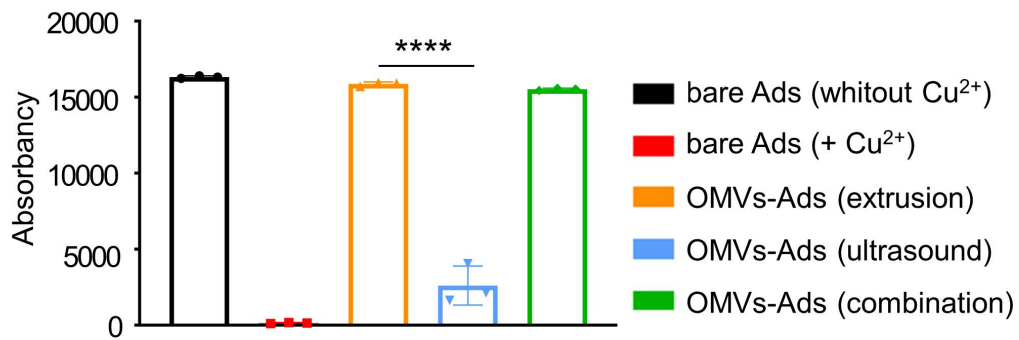

716 **Figure.** results of fluorescence quenching experiments for OMVs-Ads obtained by different preparation methods.

717 Method: “Excess Cy7 fluorescent dye was mixed with 10<sup>8</sup> Ads and incubated at 37 ° C for 3h. And  
 718 free Cy7 was filtered off by ultrafiltration method using a 30kDA ultrafiltration tube. 1mM Cu<sup>2+</sup>  
 719 solution was configured as fluorescence quenching agent. Ads-Cy7 was divided into 5 parts. The  
 720 extrusion method, the ultrasound method and the combination of the two methods were used  
 721 respectively to encapsulate adenovirus in OMV. 150 μL of bare Ads, bare Ads, and OMVs-Ads  
 722 (extrusion, ultrasound, and combination) were successively added to a black 96-well plate (n=3)  
 723 and designated G1 to G5. In G2, G3, G4 and G5, 50 μL of 1mM Cu<sup>2+</sup> solution was added and  
 724 shaken. The fluorescence intensity of each group was measured by microplate reader (wavelength  
 725 of excitation: 730; wavelength of emission: 770).”

726 **Question 3:** Autophagy-overactivated is not proper expression, since overactivated action infers to  
 727 uncontrolled process and may lead to severe side effects.

728 **Response:** We appreciate the reviewer’s comments. The original intention of using  
 729 “Autophagy-overactivated” is to express the following two meanings: One the one hand, there have  
 730 been many studies reported that host tumor cells would autophagy after being infected by Ads.

731 However, the clinical effect of Ads against tumor cells was not ideal. Herein, we proposed that more  
732 powerful autophagy induced by ROS could enhance intratumoral Ads replication to enhance tumor  
733 killing efficacy. Therefore, to distinguish between the two, we use “autophagy-overactivated” to  
734 refer to the more intense autophagy induced by ROS. On the other hand, the mildly activated  
735 autophagy is a self-protection mechanism for cells to cope with the harsh micro-environment, while  
736 the severe autophagy would lose cyto-protective function and lead to cell death by triggering  
737 autophagic cell death pathway. In our manuscript, we intended to enhance the anti-tumor ability of  
738 Ads *via* autophagy of tumor cells, which required us to induce strong autophagy in tumor cells  
739 instead of mildly activated autophagy. Therefore, to make clear to reviewers and readers the extent  
740 of autophagy referred to in our project, we used the term of “autophagy-overactivated”.

741 **Question 4:** Quantitative measurement of pyranose oxidase in critical *in vivo*. What is the  
742 contribution for this enzyme for immune activation?

743 **Response:** We appreciate the reviewer’s kind suggestion. The important role of pyranose oxidase *in*  
744 *vivo* is to promote the generation of ROS in the tumor microenvironment, thereby inducing more  
745 stronger autophagy and enhancing the antitumor efficacy of oncolytic viral immunotherapy.  
746 Therefore, we had evaluated the level of ROS at the tumor site instead of measuring the  
747 concentration of pyranose oxidase *in vivo* (Figure S16).

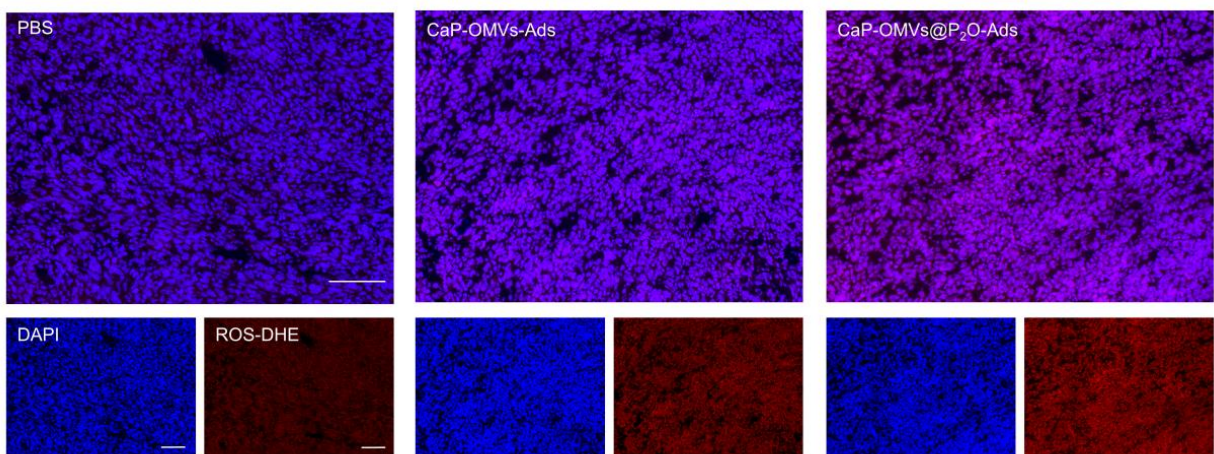

748 **Figure S16.** Immunofluorescence images of ROS in tumor tissues. Blue represents DAPI-stained tumor cells and  
749 red represents DHE. Scale bar=100  $\mu$ m.

750 **Question 5:** The scholarly presentation needs to further improve, such as no OV definition provided

751 in the manuscript.

752 **Response:** We appreciate the reviewer's comments. We are sorry for the confusion caused to the  
753 reviewer's reading due to the loopholes in scholarly expression. The revised manuscript was  
754 checked out carefully by ourselves and to better improve the readability of the manuscript, we had  
755 sent it for language revision by language revision by MogoEdit language editing service on  
756 23-Feb-2023. Futhermore, we have rechecked the expressive holes in the manuscript, such as no  
757 OV definition provided here, and the revised content has been added in the revised manuscript  
758 (page 4): “An attractive immunotherapeutic strategy is oncolytic viral biotherapy against cancer. It  
759 could selectively kill cancer cells and activate the systemic immune response using oncolytic  
760 viruses (OVs). Oncolytic adenoviruses (Ads) are commonly employed OVs due to their safety and  
761 efficacy.”

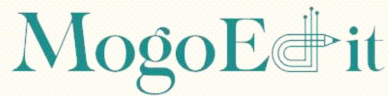

## CERTIFICATE OF ENGLISH EDITING

This is to certify that the manuscript entitled  
**Autophagy-overactivated microbial nanocomposite engineered from  
oncolytic adenoviruses for the cascade enhancement of cancer  
immunotherapy**  
commissioned to us has been carefully edited by a native English-speaking  
editor of MogoEdit, and the grammar, spelling, and punctuation have been  
verified and corrected where needed. Based on this review, we believe that the  
language in this paper meets academic journal requirements. Please contact us  
with any questions.

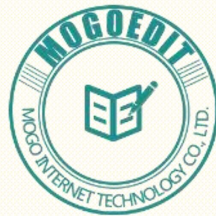

*Gang Zhang*

Dr. Gang Zhang  
Founder & CEO of MogoEdit

Date of Issue  
February 22, 2023

**Disclaimer:** The changes in the document may be accepted or rejected by the authors in their sole discretion after our editing. However, MogoEdit is not responsible for revisions made to the document after our edit on **February 22, 2023**.

MogoEdit is a professional English editing company who provides English language editing, translation, and publication support services to individuals and corporate customers worldwide. As a company invested by the affiliate fund of Chinese Academy of Science, MogoEdit is one of the leading language editing service providers in China, whose clients come from more than 1000 universities and research institutes.

MogoEdit Website: <http://en.mogoedit.com/>  
500+ native English editors: <http://en.mogoedit.com/editors>

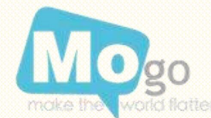

Mogo Internet Technology Co., LTD.  
No. 57, 3rd Keji Road, Xi'an 710075, PR China +86 02988317483 [support@mogoedit.com](mailto:support@mogoedit.com)

762

**Figure.** The certificate of MogoEdit language editing services on 23-Feb-2023.

763 **Question 6:** For the immune activation experiments, various critical steps are missing to generate a  
764 concrete conclusion of cascade antitumor activation.

765 **Response:** We appreciate the reviewer's comments. Oncolytic adenovirus (Ad) was an immune  
766 activation element attracting widespread attention recent years. However, the immune activation

767 capacity and anti-tumor ability of commercial Ads in clinical stage were unsatisfactory actually.  
768 Herein, to address the the clinical obstacles of Ads, the engineered OMVs@P<sub>2</sub>O have been  
769 constructed and introduced in our study. Concretely, when the microbial nanocomposite injected  
770 into the tumor, there would be a plenty of ROS producing through glucose enzymatic hydrolysis by  
771 P<sub>2</sub>O, then the excessive accumulation of ROS at the tumor site would sequentially trigger  
772 overactivated autophagy of tumor cells, thereby triggering autophagic immunogenic cells death and  
773 the production of autophagosomes. As reported in relative paper, due to the "imprisonment" effect  
774 of tumor stromal cells on Ads and the rapid death of infected tumor cells, there are no sufficient  
775 condition for the replication of Ads in tumor tissue. Here, a large number of autophagosomes  
776 provide a site for Ads to replicate, and then enhance the Ads-mediated immune response.

777 In our manuscript, as shown in Figure 2h, this result suggested that the engineered  
778 OMVs-generated ROS could promote autophagy, thereby improving the replication of Ads. After 48  
779 hours, compared with OMVs-Ads group and OMVs@P<sub>2</sub>O-Ads plus 3MA group (3MA is an  
780 autophagy inhibitor: 3-Methyladenine), the Ads replication ability of OMVs@P<sub>2</sub>O-Ads was  
781 increased by 3.74± 0.86 times. And in Figure S14, compared with the group without P<sub>2</sub>O (G3 and  
782 G5), the agents with P<sub>2</sub>O (G4 and G6) remarkably promote the immune activation in the tumor  
783 tissue. Concretely, compared with OMVs group, the proportion of CD8<sup>+</sup> T cells in OMVs@P<sub>2</sub>O  
784 group increased to 1.2 times; compared with OMVs-Ads group, the proportion of CD8<sup>+</sup> T cells in  
785 OMVs@P<sub>2</sub>O-Ads group increased to 1.24 times and compared with PBS group, the proportion of  
786 CD8<sup>+</sup> T cells in OMVs@P<sub>2</sub>O-Ads group increased to 6.15 times. Overall, the introduction of  
787 engineered OMVs@P<sub>2</sub>O could draw a concrete conclusion of cascade antitumor activation.



788 **Figure 2. Preparation and *in vitro* evaluation of the microbial nanocomposite.** (a) TEM and size distribution  
789 images of Ads, OMVs@P<sub>2</sub>O, and OMVs@P<sub>2</sub>O-Ads. Scale bar=100 nm. (b) CLSM images of the microbial  
790 nanocomposite. Ads were stained with DAPI dye (red) and OMVs carried a GFP marker (green). Scale bar=1 μm.  
791 (c) The expression of P<sub>2</sub>O was investigated by the SDS-PAGE method. (d) The ROS level assessment in TC-1

792 cells by flow cytometry. (e) TEM images of autophagosomes. Scale bar=1  $\mu\text{m}$ . (f) The expression of  
 793 autophagy-related protein LC3-I and LC3-II by western bolt analyses. (g) CLSM images of autophagosomes.  
 794 Cells were stained with EB dye (red) and autophagosomes were stained with MDC dye (blue). Scale bar=50  $\mu\text{m}$ .  
 795 (h) The Ads replication in TC-1 cells was quantified using real-time PCR at 0, 24, 36, and 48 h sequentially. 3MA  
 796 is an autophagy inhibitor: 3-Methyladenine. (i) Cytotoxicity of different formulations in TC-1 cells by CLSM.  
 797 Living cells were stained with Calcein (green) and dead cells were stained with PI (red). Scale bar=20  $\mu\text{m}$ . (j)  
 798 Schematic diagram of bridging ROS with oncolytic Ads replication. \* $p<0.05$ , \*\* $p<0.01$ , \*\*\* $p<0.001$ ,  
 799 \*\*\*\* $p<0.0001$  versus control. G1: PBS, G2: Ads, G3: OMVs, G4: OMVs@P<sub>2</sub>O, G5: OMVs-Ads, G6:  
 800 OMVs@P<sub>2</sub>O-Ads.

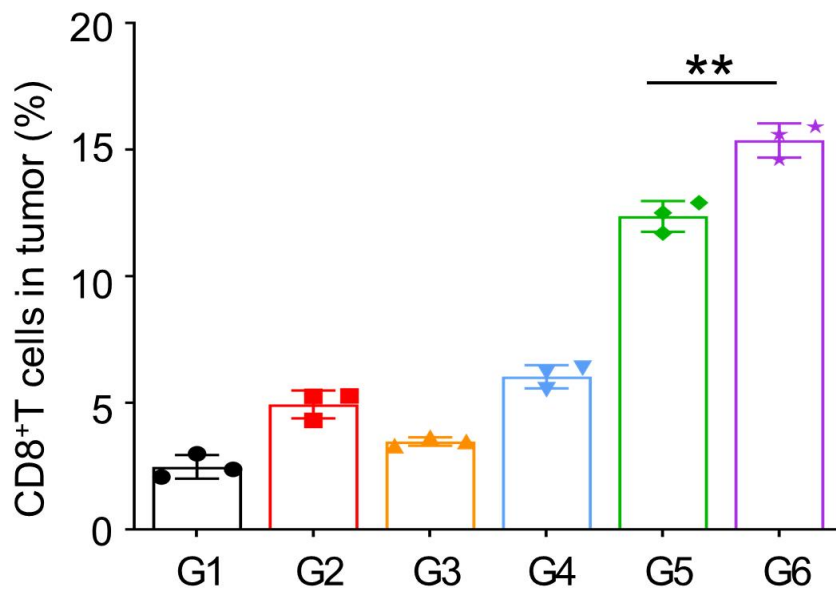

801 **Figure S14.** The infiltration of CD8<sup>+</sup>T cells in tumor of mice treated with different agents on the 18th day.



802 **Reviewer #4:** This is a meaningful work for the present autophagy-cascade-boosted  
803 immunotherapeutic method. The authors stated that OMVs@P<sub>2</sub>O promoted Ads replication and  
804 resulted in Ads-overactivated autophagy, further remolded immunosuppressive TME. However,  
805 several problems that must be clarified need to be solved.

806 **Question 1:** As we all known, oncolytic adenovirus enters tumor cells through CAR receptor to  
807 play an anti-tumor role. What mechanism does OMVs@P<sub>2</sub>O or OMVs@P<sub>2</sub>O-Ads enter tumor cells  
808 through? Does it have practical significance in tumor cells with high or low CAR expression?

809 **Response:** Thanks for reviewer's meaningful question. Human serotype 5 adenovirus (Ad5) is a  
810 non-enveloped virus and its internalization into cells primarily relies on the interaction between  
811 fiber knob of Ad and coxsackie adenovirus receptor (CAR) expressed on cell surface. Once Ad fiber  
812 binds with CAR, a RGD motif at the penton base of Ad interacts with cellular integrin ( $\alpha\beta 1$ ,  $\alpha\beta 3$ ,  
813 or  $\alpha\beta 5$ ) to induce clathrin-mediated Endocytosis. However, in our manuscript, the oncolytic virus  
814 used in this study is Ad11, which relies on CD46 receptor rather than CAR receptor for entry into  
815 cells. In addition, as is reported in related papers, the entry route of OMVs@P<sub>2</sub>O or  
816 OMVs@P<sub>2</sub>O-Ads is different from that of Ads<sup>1</sup>. Concretely, OMVs can bind to certain receptors,  
817 such as Toll-like receptor 2, and activate receptor-induced intracellular signaling in recipient cells.  
818 Besides, OMVs can also be taken up by recipient cells through direct membrane fusion or by using  
819 various endocytic routes, including macropinocytosis, phagocytosis, and endocytosis.

## 820 **References**

821 1. Li M, et al. Bacterial outer membrane vesicles as a platform for biomedical applications: An  
822 update. J Control Release 323, 253-268 (2020).

823 **Question 2:** The reason of the low intratumoral content of intravenous-delivered Ads is that the  
824 higher level of anti-adenovirus antibody in human body eliminates the exogenous injected Ads. Can  
825 OMVs@P<sub>2</sub>O or OMVs@P<sub>2</sub>O-Ads effectively avoid the elimination of neutralizing antibodies?  
826 Whether the expression level of anti-adenovirus antibody has been improved in the mouse model in  
827 advance? This is a very necessary experiment.

828 **Response:** We appreciate the reviewer's comments. The experiment of neutralizing antibody  
829 binding with OMVs@P<sub>2</sub>O-Ads has been conducted, and the result image and experimental method

830 are as follow. As shown in figure, OMVs@P<sub>2</sub>O-Ads possess abilities to protect 91.8% Ads from  
831 recognition and clearance by neutralizing antibodies.

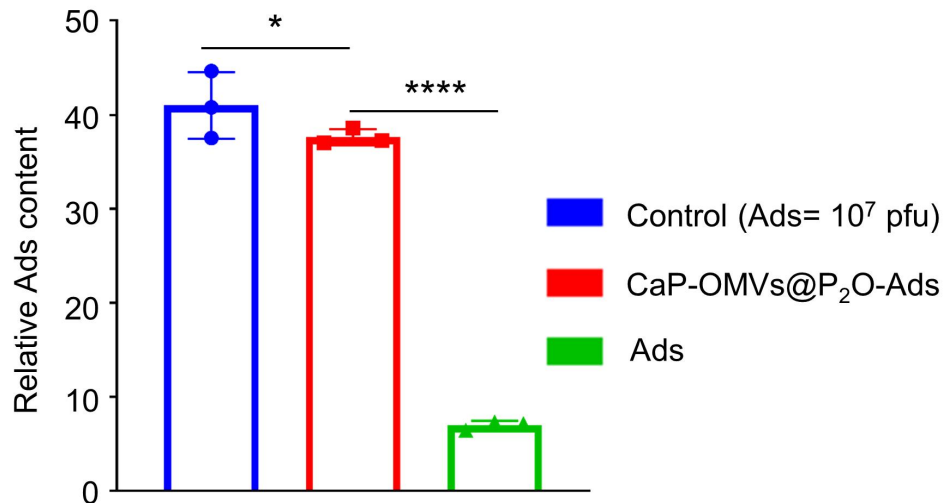

832 Figure. The result of neutralizing antibody binding with OMVs@P<sub>2</sub>O-Ads experiment.

833 **Method:** The serum containing neutralizing antibodies of ads was diluted as 1:100. Then the  
834 diluted neutralizing antibody was mixed with ads or OMVs@P<sub>2</sub>O-Ads (10<sup>7</sup> pfu/mL) and incubated  
835 for 1 h at 4 °C. Afterward, protein G-coated agarose beads (Beyotime, China) were added to the  
836 mixture and incubated for 1 h. The mixture was finally centrifuged at 6000 rpm for 1 min and the  
837 supernatant was collected. The number of ads remaining in the supernatant was determined by  
838 qPCR assay.

839 **Question 3:** Infection with oncolytic viruses leads to activation of type I IFN signaling pathways,  
840 which are crucial in oncolytic virus-mediated antitumor immunity. The authors stated that  
841 OMVs@P<sub>2</sub>O promoted Ads replication. Is this pathway activated to a greater extent by  
842 OMVs@P<sub>2</sub>O?

843 **Response:** We appreciate the reviewer's comments. As suggested by the reviewer, we have  
844 determined the content of type I IFN in the tumor tissue of mice after four different administrations  
845 (G1: PBS, G2: OMVs@P<sub>2</sub>O-Ads, G3: CaP-OMVs-Ads, G4: Intra-Ads, G5: CaP-OMVs@P<sub>2</sub>O-Ads,  
846 G6: Intra-Ads high does) *via* ELISA experiment. And the experimental result is as follows. As

847 shown in the figure, the concentration of type I IFN of G5 (CaP-OMVs@P<sub>2</sub>O-Ads) was evidently  
848 higher than G3 (CaP-OMVs-Ads), indicating that the presence of P<sub>2</sub>O could enhance the replication  
849 of Ads.

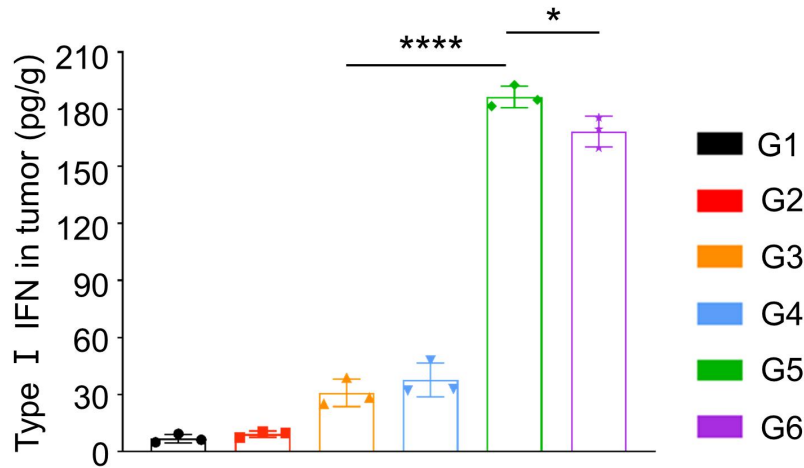

850 **Figure.** Images of concentration of type I IFN cytokines in tumor tissue.

851 **Question 4:** *In vivo* experiment on OMVs@P<sub>2</sub>O-Ads or CaP-OMVs@P<sub>2</sub>O-Ads regulating tumor  
852 immune microenvironment is not enough. The innate and adaptive immune cells, as well as the  
853 activation and exhausted markers of T cells, need to be detected.

854 **Response:** We appreciate the reviewer's comments. In this manuscript, we have performed a series  
855 of experiments on the investigation of tumor immune activation. First, to investigate the changes in  
856 gene expression after OMVs@P<sub>2</sub>O-Ads treatments, a transcriptomic analysis of the tumor  
857 xenografts was conducted to determine the expression of immune-related genes (Figure 3i-k). Then  
858 we investigated the content of M1-like macrophages (CD45<sup>+</sup>F4/80<sup>+</sup>CD80<sup>+</sup>), (CD45<sup>+</sup>F4/80<sup>+</sup>CD206<sup>+</sup>)  
859 M2-like macrophages and activated DC (CD45<sup>+</sup>CD11c<sup>+</sup>MHC-II<sup>+</sup>) at the tumor site (Figure S26-S29,  
860 Figure 5f and 5i). In addition, the amount of CD8<sup>+</sup> T cells (CD45<sup>+</sup>CD3<sup>+</sup>CD8<sup>+</sup>), IFN- $\gamma$ <sup>+</sup>CD8<sup>+</sup> T cells  
861 (CD45<sup>+</sup>CD3<sup>+</sup>CD8<sup>+</sup>IFN- $\gamma$ <sup>+</sup>) and Treg cells (CD45<sup>+</sup>CD3<sup>+</sup>CD4<sup>+</sup>Foxp3<sup>+</sup>) were measured (Figure 5c-e,  
862 g-h, S24 and S25). Furthermore, we performed T cells co-incubation experiment *in vitro* (Figure  
863 S32) and verified the dependence of CaP-OMVs@P<sub>2</sub>O-Ads on CD8<sup>+</sup> T cells in the process of  
864 anti-tumor by depleting CD8 T cells with antibodies (Figure S33). Besides, the detection of  
865 cytokines (Figure 3f-h) in serum and memory T cells (Figure S30 and S31) in spleen can also reflect  
866 the immune status of tumor to a certain extent.



867 **Figure 3. *In vivo* oncolytic efficacy of the microbial nanocomposite.** (a) *In vivo* DIR fluorescent imaging of the  
868 microbial nanocomposite in TC-1-hCD46 xenograft tumor-bearing mice by IVIS. (b) Schematic illustration of the  
869 antitumor activity and immunology assessment experiments of the microbial nanocomposite using TC-1-hCD46  
870 xenograft tumor-bearing C57 female mice model. TC-1 cells ( $10^6$ ) were subcutaneously injected into the waist of  
871 female C57 mice, and the tumor-bearing mice were divided into six groups ( $n=6$ ). When the tumor reached  
872 100-150  $\text{mm}^3$ , the mice were injected intratumorally with PBS, Ads ( $7 \times 10^5$  PFU), OMVs, OMVs@P<sub>2</sub>O,  
873 OMVs-Ads ( $7 \times 10^5$  PFU), and OMVs@P<sub>2</sub>O-Ads ( $7 \times 10^5$  PFU). The drug was given every three days for four  
874 consecutive times, the tumor volume was measured with a vernier caliper, and mice were weighed daily. (c)  
875 Tumor volume growth profiles of C57 mice bearing TC-1 xenografts. (d) Images of representative tumors of  
876 different treated groups on the 18<sup>th</sup> day ( $n=6$ ). (e) Statistical graph of tumor weight of different treated groups  
877 on the 18<sup>th</sup> day ( $n=6$ ). (f-h) Images of concentration of main cytokines in serum. (i) The differential gene expression  
878 between the samples treated with OMVs@P<sub>2</sub>O-Ads and PBS, using the absolute value of logFC greater than 1 as

879 the threshold. (j) GSEA enriched pathways of the up-regulated genes in the samples treated with  
 880 OMVs@P<sub>2</sub>O-Ads, showing immune-related terms. (k) Gene set enrichment analysis (GSEA) of the term  
 881 “Activation of immune response”, and the genes included in this pathway are highlighted in (i) with light yellow  
 882 brown. \**p*<0.05, \*\**p*<0.01, \*\*\**p*<0.001, \*\*\*\**p*<0.0001 versus control. (G1: PBS, G2: Ads, G3: OMVs, G4:  
 883 OMVs@P<sub>2</sub>O, G5: OMVs-Ads, G6: OMVs@P<sub>2</sub>O-Ads).

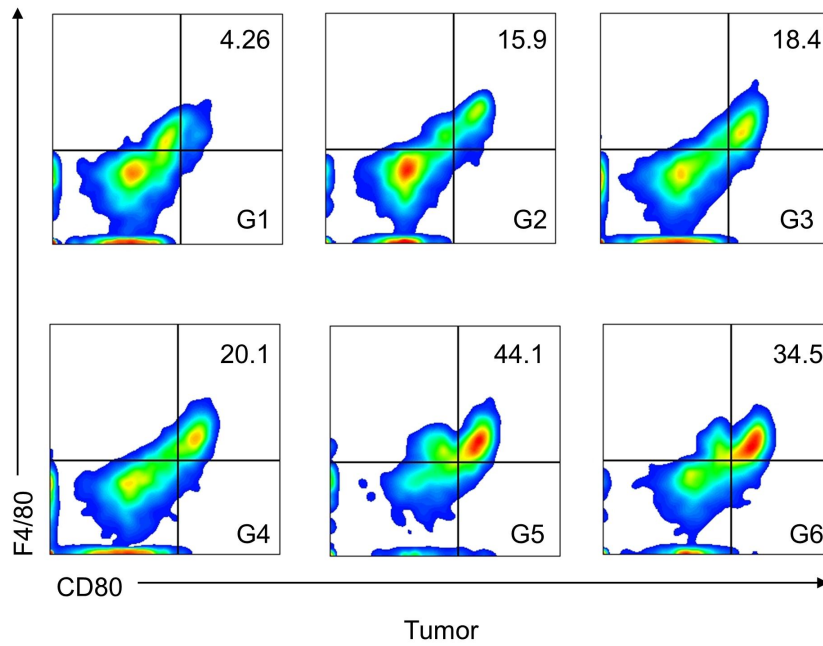

884 **Figure S26.** Representative flow cytometric evolution images of M1-like macrophages (CD45<sup>+</sup>F4/80<sup>+</sup>CD80<sup>+</sup>) in  
 885 tumor (n=3). (G1: PBS, G2: OMVs@P<sub>2</sub>O-Ads, G3: CaP-OMVs-Ads, G4: Intra-Ads, G5: CaP-OMVs@P<sub>2</sub>O-Ads,  
 886 G6: Intra-Ads high does)

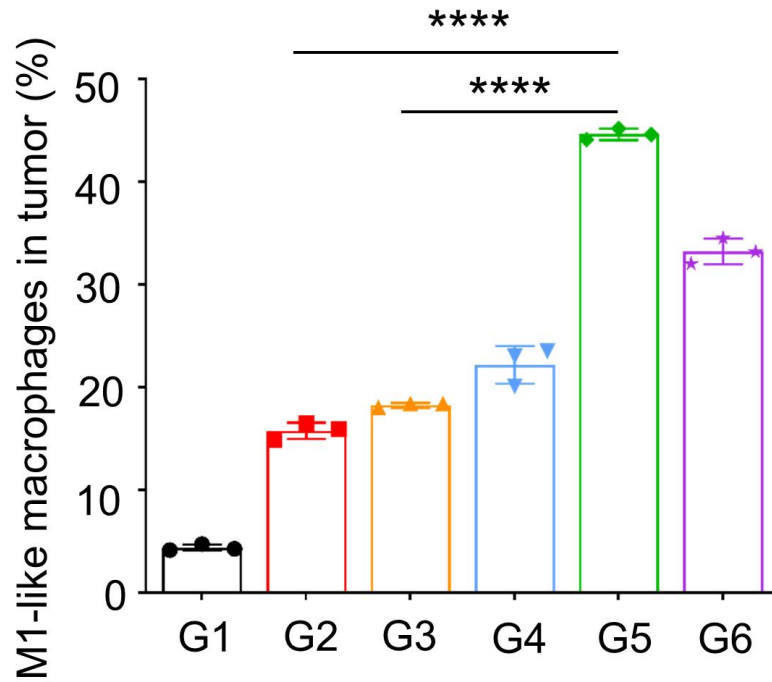

887 **Figure S27.** Relative quantification of M1-like macrophages (CD45<sup>+</sup>F4/80<sup>+</sup>CD80<sup>+</sup>) in tumor (n=3). (G1: PBS, G2:  
 888 OMVs@P<sub>2</sub>O-Ads, G3: CaP-OMVs-Ads, G4: Intra-Ads, G5: CaP-OMVs@P<sub>2</sub>O-Ads, G6: Intra-Ads high does)

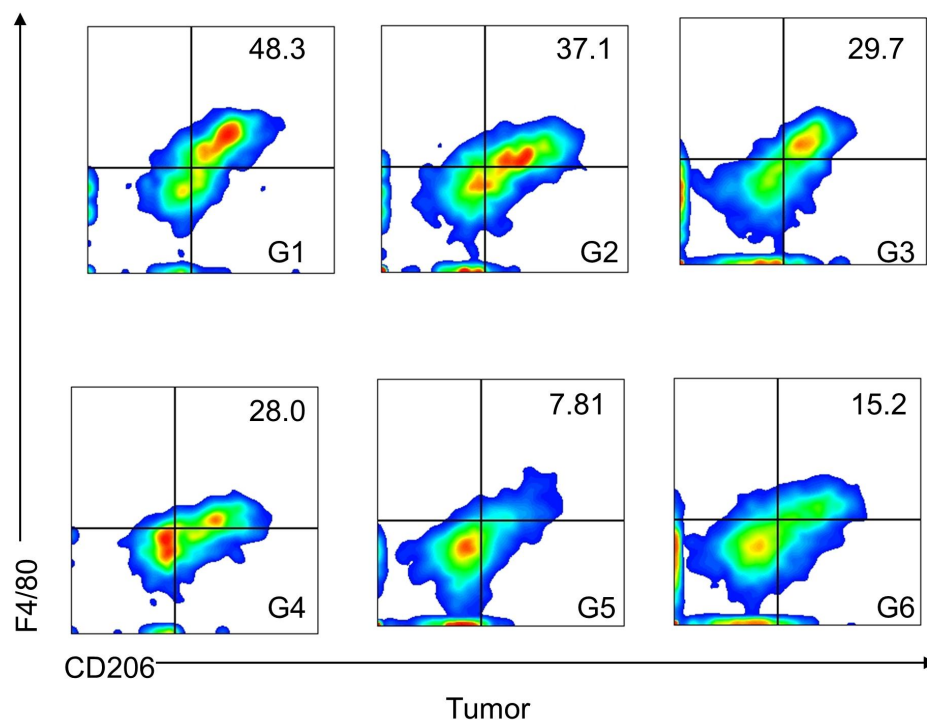

889 **Figure S28.** Representative flow cytometric evolution images of M2-like macrophages (CD45<sup>+</sup>F4/80<sup>+</sup>CD206<sup>+</sup>) in  
 890 tumor (n=3). (G1: PBS, G2: OMVs@P<sub>2</sub>O-Ads, G3: CaP-OMVs-Ads, G4: Intra-Ads, G5: CaP-OMVs@P<sub>2</sub>O-Ads,  
 891 G6: Intra-Ads high does)

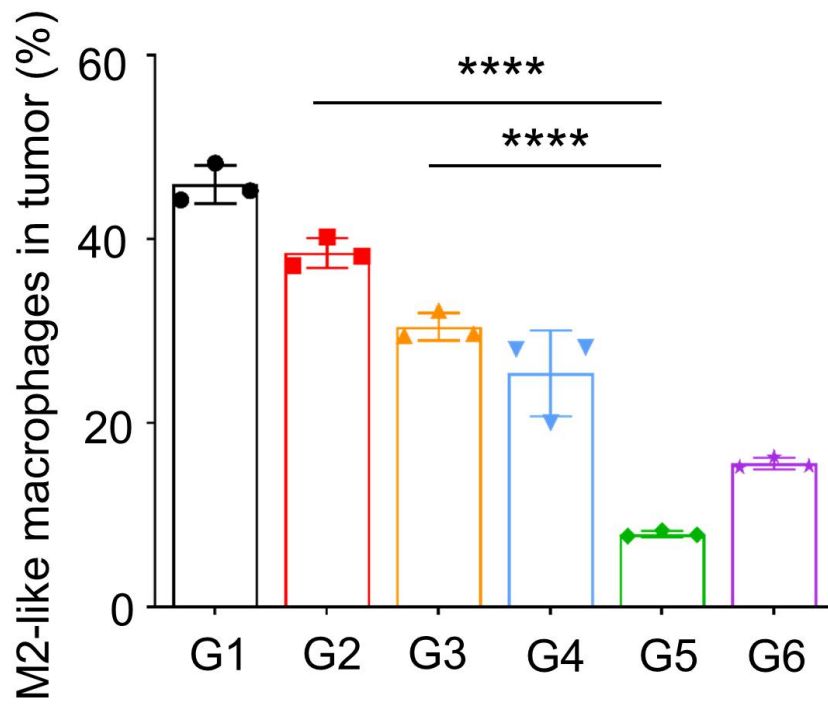

892 **Figure S29.** Relative quantification of M2-like macrophages (CD45<sup>+</sup>F4/80<sup>+</sup>CD206<sup>+</sup>) in tumor (n=3). (G1: PBS,  
 893 G2: OMVs@P<sub>2</sub>O-Ads, G3: CaP-OMVs-Ads, G4: Intra-Ads, G5: CaP-OMVs@P<sub>2</sub>O-Ads, G6: Intra-Ads high does)



894 **Figure 5. *In vivo* oncolytic efficacy and immuneactivation capacity of the biomaterialized microbial**  
 895 **nanocomposite.** (a) Schematic illustration of the antitumor activity and immunity investigation of the  
 896 biomaterialized microbial nanocomposite on TC-1-hCD46 xenograft tumor-bearing C57 female mice model. (b)  
 897 Individual tumor growth kinetics in different groups (n=6). (c) The immunofluorescence images of CD8<sup>+</sup> T cells  
 898 in tumor tissues. Scale bars=50 $\mu\text{m}$ . (d) Representative flow cytometric evolution images (g) as well as relative  
 899 quantification of CD8<sup>+</sup> T cells (CD45<sup>+</sup>CD3<sup>+</sup>CD8<sup>+</sup>) in the tumor (n=3). (e) Representative flow cytometric  
 900 evolution images (h) as well as relative quantification of Treg cells (CD45<sup>+</sup>CD3<sup>+</sup>CD4<sup>+</sup>Fcpx3<sup>+</sup>) in the tumor (n=3).  
 901 (f) Representative flow cytometric evolution images (i) and relative quantification of MHC-II<sup>+</sup> DC cells  
 902 (CD45<sup>+</sup>CD11c<sup>+</sup>MHC-II<sup>+</sup>) in the tumor (n=3). \* $p < 0.05$ , \*\* $p < 0.01$ , \*\*\* $p < 0.001$ , \*\*\*\* $p < 0.0001$  versus control. (G1:



903 PBS, G2: OMVs@P<sub>2</sub>O-Ads, G3: CaP-OMVs-Ads, G4: Intra-Ads, G5: CaP-OMVs@P<sub>2</sub>O-Ads, G6: Intra-Ads high  
904 does).

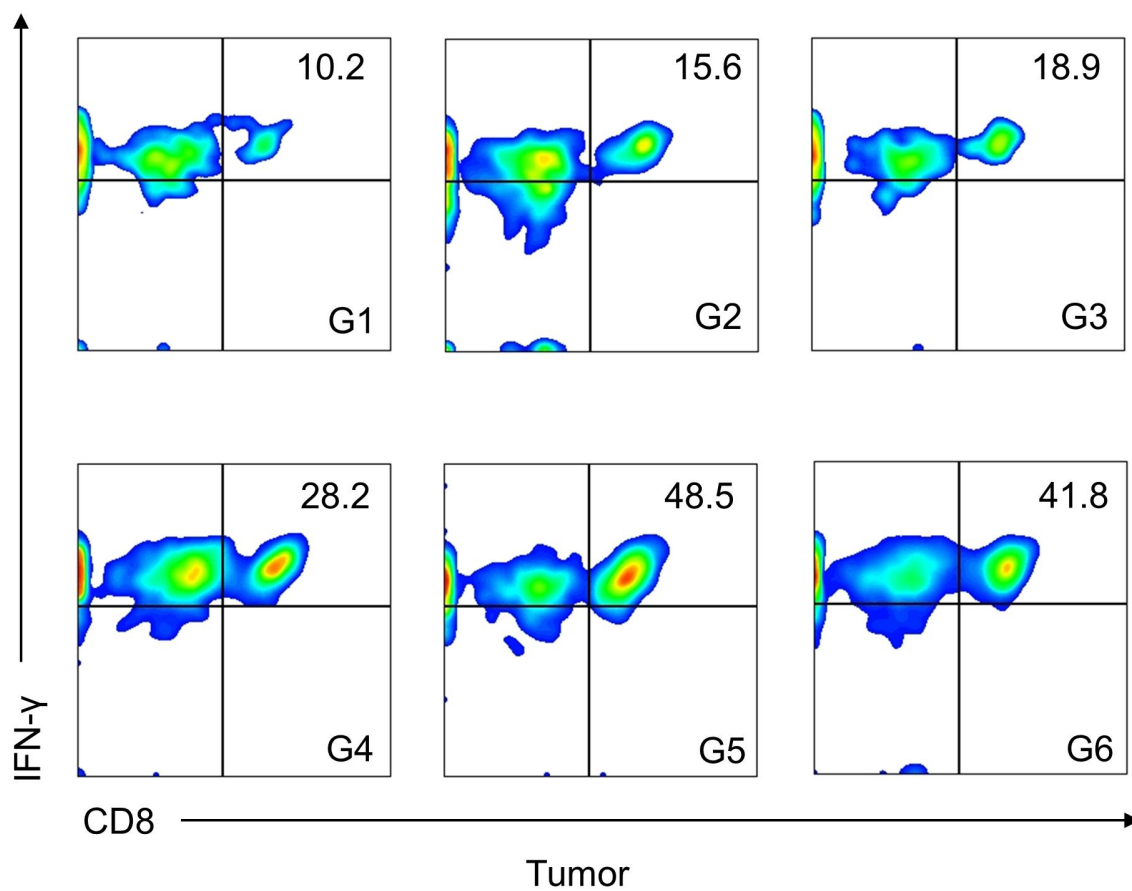

905 **Figure S24.** Representative flow cytometric evolution images of IFN- $\gamma$ <sup>+</sup>CD8<sup>+</sup> T cells (CD45<sup>+</sup>CD3<sup>+</sup>CD8<sup>+</sup>IFN- $\gamma$ <sup>+</sup>)  
906 in tumor (n=3). (G1: PBS, G2: OMVs@P<sub>2</sub>O-Ads, G3: CaP-OMVs-Ads, G4: Intra-Ads, G5:  
907 CaP-OMVs@P<sub>2</sub>O-Ads, G6: Intra-Ads high does)

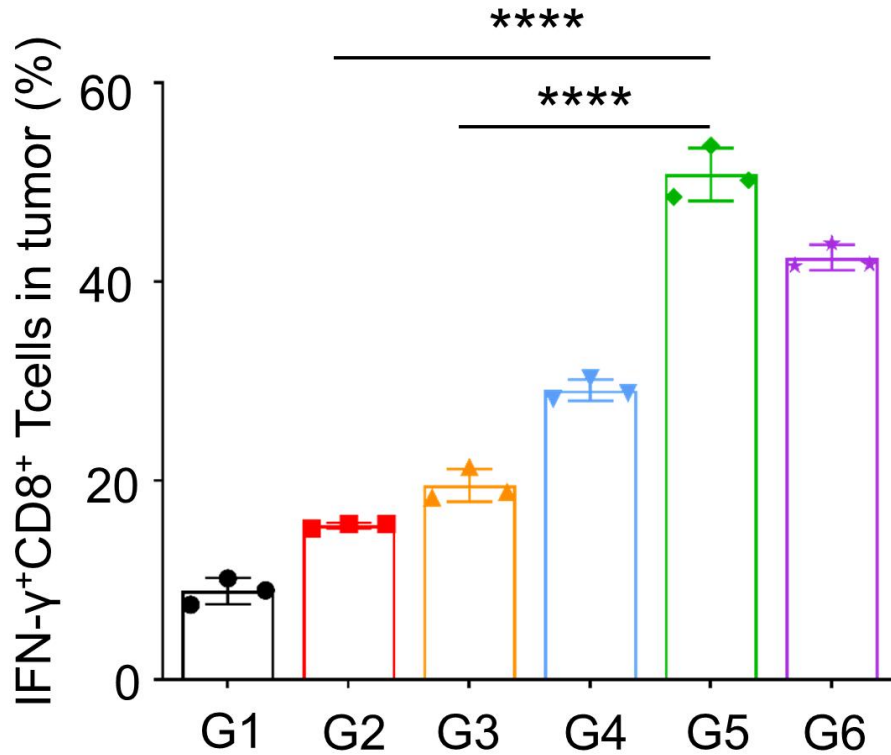

908 **Figure S25.** Relative quantification of IFN-γ<sup>+</sup>CD8<sup>+</sup> T cells (CD45<sup>+</sup>CD3<sup>+</sup>CD8<sup>+</sup>IFN-γ<sup>+</sup>) in tumor (n=3). (G1: PBS,  
 909 G2: OMVs@P<sub>2</sub>O-Ads, G3: CaP-OMVs-Ads, G4: Intra-Ads, G5: CaP-OMVs@P<sub>2</sub>O-Ads, G6: Intra-Ads high  
 910 does)

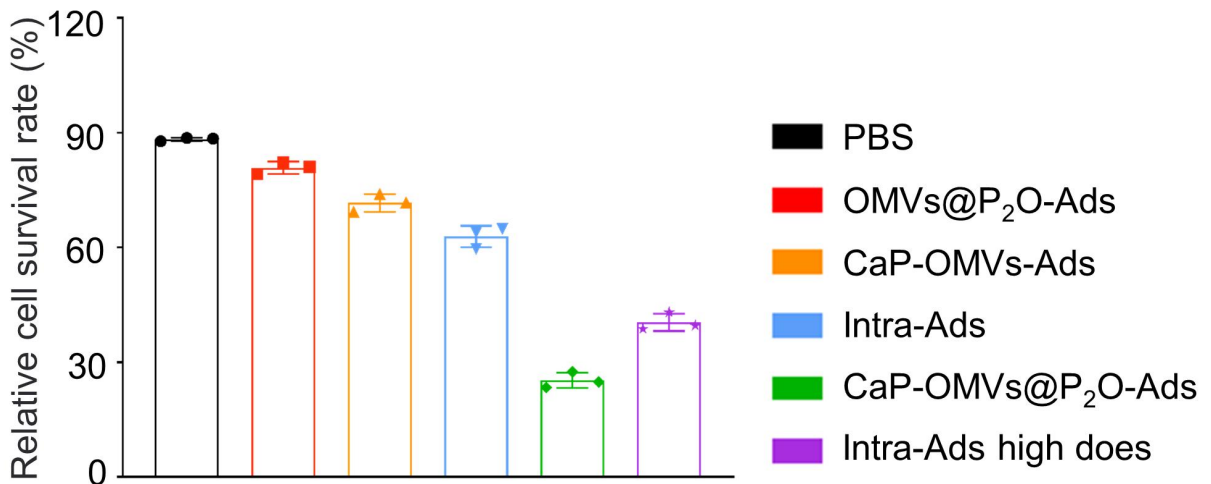

911 **Figure S32.** The experimental result of the co-culture assay. (It's worth noting here that PBS represents T cells  
 912 extracted from mice in the PBS group, and other groups as above.)

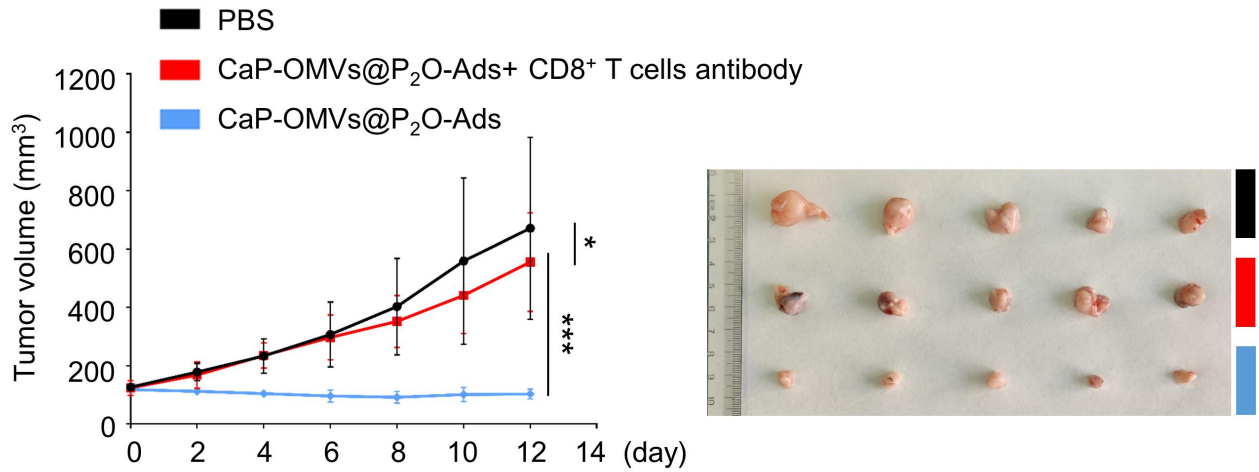

913 **Figure S33.** Tumor volume during the treatments and images of representative tumors of different treated groups  
 914 on the 12<sup>th</sup> day (n=5).

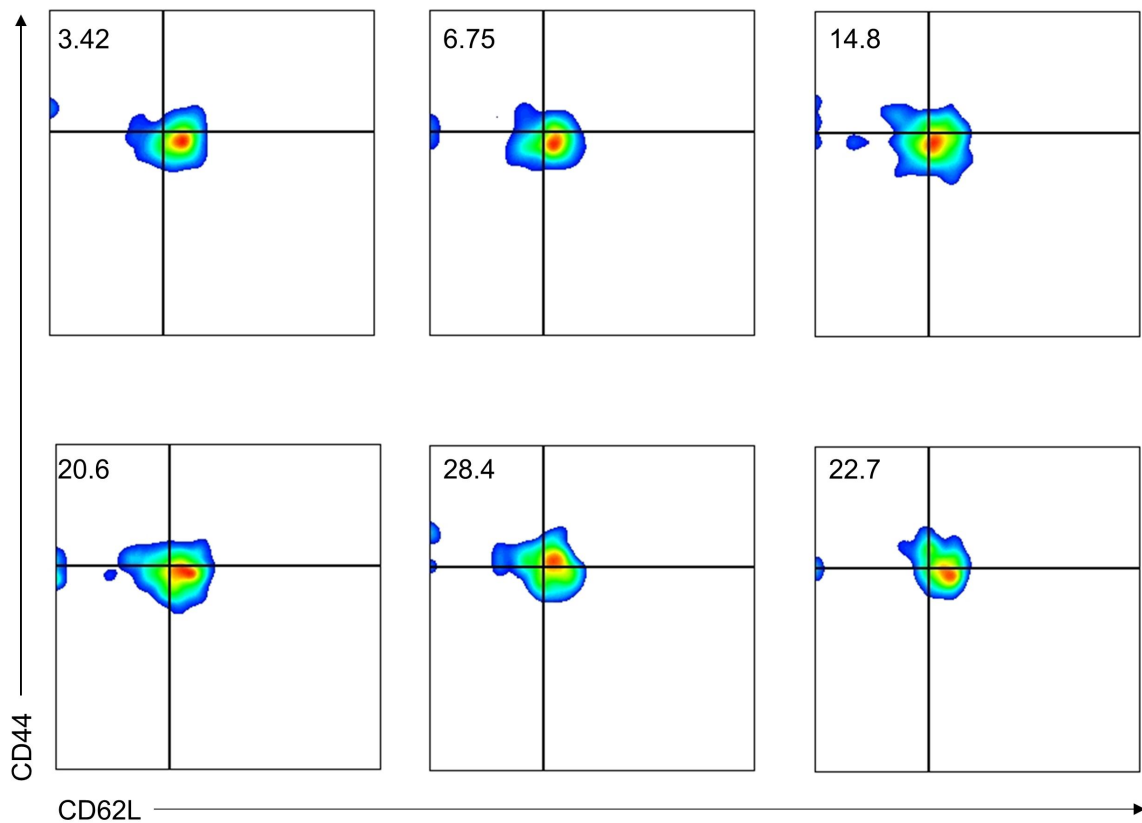

915 **Figure S30.** The gating strategy of effector memory T cells (CD3<sup>+</sup> CD8<sup>+</sup> CD62L<sup>-</sup> CD44<sup>+</sup>) in spleen (n=3). (G1:  
 916 PBS, G2: OMVs@P<sub>2</sub>O-Ads, G3: CaP-OMVs-Ads, G4: Intra-Ads, G5: CaP-OMVs@P<sub>2</sub>O-Ads, G6: Intra-Ads high  
 917 does).

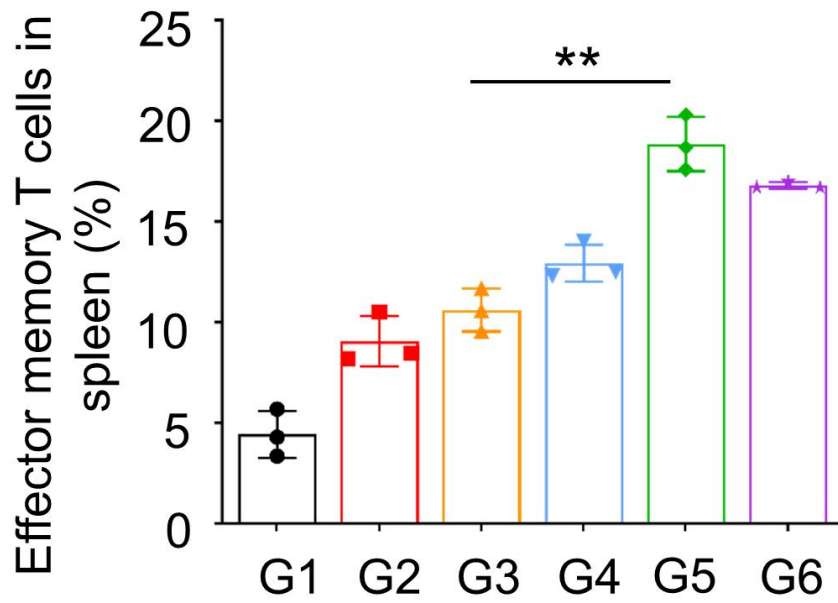

918 **Figure S31.** Relative quantification of effector memory T cells ( $CD3^+ CD8^+ CD62L^- CD44^+$ ) in spleen (n=3). (G1:  
919 PBS, G2: OMVs@P<sub>2</sub>O-Ads, G3: CaP-OMVs-Ads, G4: Intra-Ads, G5: CaP-OMVs@P<sub>2</sub>O-Ads, G6: Intra-Ads high  
920 does).

## **REVIEWERS' COMMENTS**

Reviewer #2 (Remarks to the Author):

The authors have addressed all my concerns by conducting additional experiments and analysis. The results are solid.

Reviewer #3 (Remarks to the Author):

Reviewer #4 (Remarks to the Author):

The revised manuscript, "Autophagy-overactivated microbial nanocomposite engineered from oncolytic adenoviruses for the cascade enhancement of cancer immunotherapy" are very effective in addressing all the reviewer's comments and concerns. The manuscript is clearly to be accepted.

## **Responses to the reviewers' comments**

**Reviewer #2:** The authors have addressed all my concerns by conducting additional experiments and analysis. The results are solid.

**Response:** Thanks for the reviewer's recognition and support of our work.

**Reviewer #4:** The revised manuscript, “Autophagy-overactivated microbial nanocomposite engineered from oncolytic adenoviruses for the cascade enhancement of cancer immunotherapy” are very effective in addressing all the reviewer’s comments and concerns. The manuscript is clearly to be accepted.

**Response:** We are truly grateful to your valuable comments and approval.
